# Supplementary material for: Projected effectiveness of mandatory industrial fortification of wheat flour, milk, and edible oil with multiple micronutrients among Mongolian adults
Source: PLoS One. 2018 Aug 2;13(8):e0201230. doi: 10.1371/journal.pone.0201230 (PMC6071971; doi:10.1371/journal.pone.0201230)
Supplement: S2 File — For assistance in secondary analysis of these de-identified data, readers are welcome to contact the corresponding author (sbromage@mail.harvard.edu). Participant codes and characteristics are represented by the variables "Person-Day Code", "Sex", "Region", "Locality", "Season", "Day of Observation", "Age in Years", "Day of Week", "Month", and "Survey Weight". Nutrient intakes are represented by "Folate (ug)", "Iron (mg)", "Niacin (mg)", "Retinol (ug)", "Riboflavin (mg)", "Thiamin (mg)", "Vitamin A (ug)", "Vitamin B12 (ug)", "Vitamin D (IU)", "Vitamin E (mg)", and "Zinc (mg)". Vehicle intakes are represented by "Flour (g)", "Milk (g)", and "Oil (g)". (XLSX) [file pone.0201230.s012.xlsx]

## Sheet: winter rural
Person-Day Code	Sex	Region	Locality	Season	Day of Observation	Age in Years	Day of Week	Month	Survey Weight	Folate (ug)	Iron (mg)	Niacin (mg)	Retinol (ug)	Riboflavin (mg)	Thiamin (mg)	Vitamin A (ug)	Vitamin B12 (ug)	Vitamin D (IU)	Vitamin E (mg)	Zinc (mg)	Flour (g)	Oil (g)	Milk (g)
10FNGN_S_1	Female	Bulgan	Rural	Summer	1	52	Thursday	August	0.620118	37.0402	6.43944	9.06254	69.9303	0.705439	0.214294	122.861	3.95499	13.2717	3.35589	9.62054	145.801	5.516	124.824
10FNGN_S_2	Female	Bulgan	Rural	Summer	2	52	Friday	August	0.620118	180.47	14.254	16.0288	1142.13	1.60743	1.58105	1204.73	7.39448	63.5623	6.22247	10.209	215.188	17.792	81.0396
10FNGN_S_3	Female	Bulgan	Rural	Summer	3	52	Saturday	August	0.620118	160.366	11.6353	12.3865	465.085	1.05703	0.727905	512.263	6.32676	23.1567	8.51969	10.2856	242.312	21.632	81.2956
10FNGN_W_1	Female	Bulgan	Rural	Winter	1	55	Monday	January	0.463341	112.094	10.307	9.65166	324.827	1.66771	0.623793	362.212	5.95474	36.9654	4.53636	13.3362	150.985	9.504	493.078
10FNGN_W_2	Female	Bulgan	Rural	Winter	2	55	Tuesday	January	0.579176	72.9297	6.31003	8.98034	46.9571	0.765842	0.215253	53.7084	3.95577	10.6535	1.07598	10.1089	118.761	0	97.2987
10FNGN_W_3	Female	Bulgan	Rural	Winter	3	55	Wedesday	January	0.579176	223.616	12.354	13.8495	148.588	1.12368	0.810152	157.703	3.78646	20.0939	5.60662	10.7454	258.345	19.888	142.289
11FNGN_S_1	Female	Bulgan	Rural	Summer	1	58	Thursday	August	0.620118	76.668	5.84759	8.81776	426.197	1.10654	0.444616	484.046	4.59943	36.4545	2.35786	10.4313	140.913	5.784	210.344
11FNGN_S_2	Female	Bulgan	Rural	Summer	2	58	Friday	August	0.620118	118.316	13.514	26.5969	913.946	2.14091	0.928566	1033.59	13.8318	86.1874	5.83983	27.1323	111.968	0	294.073
11FNGN_S_3	Female	Bulgan	Rural	Summer	3	58	Saturday	August	0.620118	151.73	17.6759	26.9726	4640.47	3.65996	1.35544	4678.99	56.1515	78.1434	6.09045	19.6399	9.8815	0	64.836
1FNGN_S_1	Female	Bulgan	Rural	Summer	1	42	Thursday	August	0.646912	137.013	17.5073	27.1286	2046.63	2.67977	1.21897	2092.69	30.5768	34.2642	4.13069	19.0075	176.777	3.696	138.651
1FNGN_S_2	Female	Bulgan	Rural	Summer	2	42	Friday	August	0.646912	92.727	13.6876	16.87	82.8629	1.46352	1.22683	140.974	4.71568	26.723	6.60231	12.9812	316.889	12.964	195.878
1FNGN_S_3	Female	Bulgan	Rural	Summer	3	42	Sunday	August	0.51753	82.3352	8.00879	9.85469	264.58	0.934989	0.918891	469.992	1.55694	27.2909	2.04084	5.33652	199.386	5.808	75.7906
1FNGN_W_1	Female	Bulgan	Rural	Winter	1	39	Monday	January	0.463221	72.3757	8.27803	10.985	291.8	1.62701	0.535852	379.894	6.08941	32.9337	3.60908	14.5038	94.298	11.304	355.882
1FNGN_W_2	Female	Bulgan	Rural	Winter	2	39	Tuesday	January	0.579026	298.24	14.9243	11.3651	94.2	0.963421	0.854798	120.835	3.90969	6.39986	6.62159	7.82389	248.287	23.848	0
1FNGN_W_3	Female	Bulgan	Rural	Winter	3	39	Wedesday	January	0.579026	151.884	15.2881	18.0417	3.45718	1.17837	0.704733	100.506	10.4344	1.24228	4.45058	23.7776	144.495	8.448	0
2FNGN_S_2	Female	Bulgan	Rural	Summer	2	37	Friday	August	0.646912	1.3494	0.154187	0.125666	100.74	0.108158	0.0246174	100.743	0.778198	4.62374	0.235921	0.509349	0.00669663	0	28.8055
2FNGN_S_3	Female	Bulgan	Rural	Summer	3	37	Saturday	August	0.646912	48.9258	7.7877	9.4534	443.951	1.09452	0.586265	485.074	4.51607	34.046	4.97872	8.55828	174.788	7.588	179.235
2FNGN_W_1	Female	Bulgan	Rural	Winter	1	37	Monday	January	0.463221	103.743	34.0722	30.1348	607.412	2.00861	1.22363	1752.02	14.7362	38.9124	12.7137	25.5411	545.756	15.372	152.63
2FNGN_W_2	Female	Bulgan	Rural	Winter	2	37	Tuesday	January	0.579026	65.7467	14.6244	12.5306	96.8011	1.06494	0.467451	201.896	7.03045	10.0632	10.5415	18.5408	351.985	18.48	89.6173
2FNGN_W_3	Female	Bulgan	Rural	Winter	3	37	Wedesday	January	0.579026	28.535	6.62042	6.65143	107.471	0.760508	0.264576	157.491	4.1254	11.4215	2.2127	10.2042	103.915	0	131.993
3FNGN_S_1	Female	Bulgan	Rural	Summer	1	32	Thursday	August	1.10244	99.4713	7.39115	8.32028	0	0.64184	0.627824	45.8002	1.56603	0.162039	3.23729	4.36278	192.868	8.504	0
3FNGN_S_2	Female	Bulgan	Rural	Summer	2	32	Friday	August	1.10244	81.6547	5.17678	6.6287	303.497	0.582432	0.478816	341.677	1.30164	22.7079	2.27743	4.64581	85.772	0	0
3FNGN_S_3	Female	Bulgan	Rural	Summer	3	32	Saturday	August	1.10244	205.878	16.615	23.6471	414.94	1.45504	1.17526	619.922	6.01229	47.1629	7.06951	17.5524	255.476	50.376	32.0062
3FNGN_W_1	Female	Bulgan	Rural	Winter	1	33	Monday	January	0.958557	243.083	21.3405	18.3343	47.5124	1.33005	1.14758	47.6801	6.38436	6.00361	5.82743	9.1815	280.305	20.856	95.5064
3FNGN_W_2	Female	Bulgan	Rural	Winter	2	33	Tuesday	January	1.1982	201.523	13.8546	10.3881	48.259	0.910817	0.7452	53.1743	3.79507	6.1488	5.4853	6.19646	276.201	20.812	97.3953
3FNGN_W_3	Female	Bulgan	Rural	Winter	3	33	Wedesday	January	1.1982	35.9725	10.0938	13.9569	93.4773	0.958831	0.39834	126.459	9.43551	9.51378	2.56691	21.9451	19.8209	4.776	55.0088
4FNGN_S_1	Female	Bulgan	Rural	Summer	1	32	Thursday	August	1.10244	148.688	9.64143	14.8894	160.353	1.11399	0.575311	186.918	6.98405	21.2522	4.03325	16.0032	142.511	0	0
4FNGN_S_2	Female	Bulgan	Rural	Summer	2	32	Friday	August	1.10244	137.593	10.0775	15.0956	0	0.815019	1.11679	144.244	4.49837	24.6285	5.38587	12.9911	183.997	8.82	0
4FNGN_S_3	Female	Bulgan	Rural	Summer	3	32	Saturday	August	1.10244	121.063	11.19	16.1226	0	0.851473	0.897589	127.336	5.19156	22.3379	6.79896	15.9316	246.529	11.928	0
4FNGN_W_1	Female	Bulgan	Rural	Winter	1	35	Monday	January	0.463221	85.9108	6.90378	8.51697	23.9426	0.543685	0.275728	50.4088	3.12986	7.18411	2.99291	8.10229	129.6	7.104	52.106
4FNGN_W_2	Female	Bulgan	Rural	Winter	2	35	Tuesday	January	0.579026	97.7694	11.0708	19.4213	20.797	0.963814	0.269732	31.2082	8.27154	15.5748	1.6447	20.1426	190.831	0	49.1615
4FNGN_W_3	Female	Bulgan	Rural	Winter	3	35	Wedesday	January	0.579026	135.544	16.3447	23.6866	28.203	1.16251	0.438912	28.776	9.59258	18.9166	3.33083	24.3582	356.964	5.104	61.7968
5FNGN_S_1	Female	Bulgan	Rural	Summer	1	56	Thursday	August	0.620118	58.1834	2.19031	5.13268	345.264	0.467156	0.270031	367.826	0.339187	31.8273	3.36474	1.98603	90.45	1.148	0
5FNGN_S_2	Female	Bulgan	Rural	Summer	2	56	Friday	August	0.620118	58.2137	4.12423	5.00236	714.933	0.757888	0.395373	763.356	1.76742	53.813	4.26363	5.91933	109.481	0	90.8975
5FNGN_S_3	Female	Bulgan	Rural	Summer	3	56	Saturday	August	0.620118	391.945	20.3557	33.1356	9328.37	6.14013	1.68433	9550.66	93.6649	43.0517	6.56205	22.0115	158.563	5.85	51.2099
5FNGN_W_1	Female	Bulgan	Rural	Winter	1	56	Monday	January	0.463341	53.0646	9.36618	13.89	25.7796	0.76111	0.291884	81.2866	5.87714	11.0456	3.46564	14.7461	191.093	10.12	60.9397
5FNGN_W_2	Female	Bulgan	Rural	Winter	2	56	Tuesday	January	0.579176	51.1978	3.34578	3.49559	174.049	0.529627	0.249409	196.098	1.76546	19.4671	2.35461	4.76251	103.085	2.2	76.8422
5FNGN_W_3	Female	Bulgan	Rural	Winter	3	56	Wedesday	January	0.579176	121.079	12.4834	17.8427	946.909	1.37922	0.367509	952.631	19.3533	10.0332	2.44314	17.1266	170.551	2.816	0
6FNGN_S_1	Female	Bulgan	Rural	Summer	1	59	Thursday	August	0.620118	222.068	36.882	43.3556	61.6505	2.53241	2.92559	203.879	24.1824	59.7097	4.81617	33.2151	345.423	1.8	0
6FNGN_S_2	Female	Bulgan	Rural	Summer	2	59	Friday	August	0.620118	62.1255	6.16193	7.01921	29.5182	0.45895	0.854045	52.2603	2.10756	23.1646	2.98109	7.52468	133.533	19.854	0
6FNGN_S_3	Female	Bulgan	Rural	Summer	3	59	Saturday	August	0.620118	102.629	17.7967	18.9106	70.0554	1.54158	1.69502	134.384	10.4009	31.8757	2.2883	14.3548	85.6585	0	0
6FNGN_W_1	Female	Bulgan	Rural	Winter	1	58	Monday	January	0.463341	116.061	26.0453	27.0189	0	1.39596	0.617999	93.5817	13.8113	8.32249	9.1817	29.713	512.634	11.536	0
6FNGN_W_2	Female	Bulgan	Rural	Winter	2	58	Tuesday	January	0.579176	128.177	32.0255	40.3717	0	1.99349	0.846287	108.385	21.7217	15.208	11.7251	49.762	440.957	14.896	0
6FNGN_W_3	Female	Bulgan	Rural	Winter	3	58	Wedesday	January	0.579176	103.602	27.8665	24.9217	0	1.28284	0.539927	73.5668	13.2561	6.36131	9.35637	24.4484	534.476	94.848	0
7FNGN_S_1	Female	Bulgan	Rural	Summer	1	52	Thursday	August	0.620118	65.262	6.12066	8.93901	171.543	1.13344	0.618064	215.508	2.91587	19.7255	1.1787	8.75213	176.511	6.768	105.364
7FNGN_S_2	Female	Bulgan	Rural	Summer	2	52	Friday	August	0.620118	127.17	14.3746	32.5933	280.016	2.37763	0.939137	290.873	13.103	35.7887	1.84546	32.1677	64.0746	0	113.814
7FNGN_S_3	Female	Bulgan	Rural	Summer	3	52	Saturday	August	0.620118	160.973	9.09918	10.4686	140.535	0.801486	0.630161	294.177	3.67826	16.5441	4.33832	9.667	143.722	16.814	77.711
7FNGN_W_1	Female	Bulgan	Rural	Winter	1	52	Monday	January	0.463341	85.6504	7.70705	10.3093	100.132	0.935108	0.342244	157.508	3.53294	12.7831	4.37255	11.0179	276.498	6.948	100.154
7FNGN_W_2	Female	Bulgan	Rural	Winter	2	52	Tuesday	January	0.579176	129.115	21.1264	23.9876	103.369	1.86693	0.863095	248.266	10.3627	11.8023	6.27174	30.5445	327.069	3.08	99.0911
7FNGN_W_3	Female	Bulgan	Rural	Winter	3	52	Wedesday	January	0.579176	31.028	6.25119	7.93679	99.3208	0.735205	0.400486	144.277	3.01197	9.7306	1.58329	8.96539	98.5177	6.312	81.2956
8FNGN_W_1	Female	Bulgan	Rural	Winter	1	57	Monday	January	0.463341	195.615	19.2397	16.2855	83.9823	1.21549	0.96644	111.292	7.9468	8.29263	5.55975	14.9855	284.181	12.496	0
8FNGN_W_2	Female	Bulgan	Rural	Winter	2	57	Tuesday	January	0.579176	117.849	6.38993	4.70496	120.199	0.422513	0.379185	146.532	1.50861	10.3833	4.89751	4.48762	152.45	13.836	6.04747
8FNGN_W_3	Female	Bulgan	Rural	Winter	3	57	Wedesday	January	0.579176	70.8077	13.7337	13.9097	0	0.801725	0.376814	70.0189	8.69562	0.799602	2.54562	14.5213	119.274	0	0
9FNGN_S_1	Female	Bulgan	Rural	Summer	1	53	Thursday	August	0.620118	12.0517	1.83723	2.88661	17.7099	0.267722	0.117844	62.864	1.59776	2.55085	0.437497	4.02466	0.00973243	6.96	41.8641
9FNGN_S_2	Female	Bulgan	Rural	Summer	2	53	Friday	August	0.620118	100.785	8.88214	11.6785	129.496	1.41307	0.479392	244.518	6.78369	16.7148	2.34021	17.1492	66.9676	13.8	260.167
9FNGN_S_3	Female	Bulgan	Rural	Summer	3	53	Saturday	August	0.620118	102.933	26.0788	20.4909	101.236	1.48865	0.599773	185.405	12.3496	11.7687	11.1914	20.9804	513.704	17.892	96.5306
9FNGN_W_1	Female	Bulgan	Rural	Winter	1	53	Monday	January	0.463341	217.6	9.69303	10.4956	41.1873	0.658078	0.633985	96.126	2.67896	6.70672	4.495	7.8686	177.489	22.928	7.15107
9FNGN_W_2	Female	Bulgan	Rural	Winter	2	53	Tuesday	January	0.579176	102.309	5.91683	9.11769	0	0.554608	0.171749	44.354	3.88094	4.91513	0.766668	8.87696	77.943	6.816	0
9FNGN_W_3	Female	Bulgan	Rural	Winter	3	53	Wedesday	January	0.579176	83.642	15.9514	17.4465	1270.09	0.898168	0.368426	1339.76	7.06462	119.534	10.3407	18.7549	313.139	10.052	35.7189
10MNGN_S_1	Male	Bulgan	Rural	Summer	1	52	Thursday	August	0.535823	66.5122	7.94195	10.794	0	0.66643	0.490301	105.815	4.72591	0.727375	1.63689	12.7174	73.4579	13.8	0
10MNGN_S_2	Male	Bulgan	Rural	Summer	2	52	Friday	August	0.535823	80.6984	7.96488	10.3189	107.37	1.15747	0.412403	200.441	5.91821	13.6869	2.11935	15.0453	68.6483	10.32	207.942
10MNGN_S_3	Male	Bulgan	Rural	Summer	3	52	Saturday	August	0.535823	86.2544	26.4295	20.6391	234.227	1.78129	0.660545	286.256	13.1788	24.4125	8.26369	18.568	451.202	9.604	218.154
10MNGN_W_1	Male	Bulgan	Rural	Winter	1	57	Monday	January	0.447622	178.319	17.7149	37.9114	4.83088	1.51975	0.609208	164.922	15.5946	22.4909	2.43286	37.6398	129.631	14.64	0
10MNGN_W_2	Male	Bulgan	Rural	Winter	2	57	Tuesday	January	0.559527	220.351	19.7589	33.7431	0	1.59678	0.53582	92.9601	13.6138	21.7892	2.85798	34.3946	359.771	14.232	0
10MNGN_W_3	Male	Bulgan	Rural	Winter	3	57	Wedesday	January	0.559527	209.128	28.0284	43.6946	5.17894	1.83342	0.612158	75.7955	17.7551	28.8468	4.69496	44.4208	596.06	0	0
1MNGN_S_1	Male	Bulgan	Rural	Summer	1	42	Thursday	August	0.710438	172.863	22.6803	37.075	2889.91	3.37743	1.38201	2941.71	46.3058	30.9283	4.22708	25.5548	196.117	4.06	81.0396
1MNGN_S_2	Male	Bulgan	Rural	Summer	2	42	Friday	August	0.710438	163.847	37.3051	38.9859	1704.4	3.41622	1.39436	1807.39	46.9694	47.252	10.2959	27.4128	351.301	17.024	203.559
1MNGN_S_3	Male	Bulgan	Rural	Summer	3	42	Sunday	August	0.56835	202.729	10.37	14.1135	16.7862	0.94207	1.21065	226.221	3.74417	24.5786	1.65244	11.9456	321.18	27.246	29.5737
1MNGN_W_1	Male	Bulgan	Rural	Winter	1	39	Monday	January	0.52755	133.809	29.6492	34.5505	3289.65	4.30285	1.07579	3427.14	61.2011	47.6949	5.31114	26.4177	72.0346	15.24	348.526
1MNGN_W_2	Male	Bulgan	Rural	Winter	2	39	Tuesday	January	0.659437	287.926	45.2377	49.3765	5382.8	5.65266	1.35886	5403.5	104.189	4.32273	6.21339	27.768	167.345	7.656	0
1MNGN_W_3	Male	Bulgan	Rural	Winter	3	39	Wedesday	January	0.659437	17.8615	0.637618	1.06034	4.31081	0.127907	0.0457831	6.30778	0.259425	0.590724	0.0865569	1.22317	12.4429	0	10.5412
2MNGN_S_1	Male	Bulgan	Rural	Summer	1	52	Thursday	August	0.535823	32.182	1.78696	3.45714	1.38129	0.201733	0.100386	6.68714	1.33802	2.11779	0.130529	3.63777	33.0663	0	4.19797
2MNGN_S_2	Male	Bulgan	Rural	Summer	2	52	Friday	August	0.535823	67.7229	4.9427	9.81918	3.45623	0.423675	0.186878	58.6684	3.7767	5.86735	0.5402	9.61684	157.41	8.808	0
2MNGN_S_3	Male	Bulgan	Rural	Summer	3	52	Saturday	August	0.535823	79.5798	8.13772	10.4324	0	0.514318	0.524691	57.5932	3.79724	15.9052	6.05561	10.5796	212.869	12.852	0
2MNGN_W_1	Male	Bulgan	Rural	Winter	1	52	Monday	January	0.447622	248.768	58.6749	75.1351	7274.87	8.11122	1.60818	7275.47	143.391	30.0938	6.56205	52.1768	278.398	0	240.942
2MNGN_W_2	Male	Bulgan	Rural	Winter	2	52	Tuesday	January	0.559527	114.286	15.7038	23.8265	17.335	1.12996	0.383999	67.5459	9.82609	15.5162	2.68333	24.8632	446.162	9.672	32.0062
2MNGN_W_3	Male	Bulgan	Rural	Winter	3	52	Wedesday	January	0.559527	92.2071	12.4722	20.759	144.96	1.11371	0.614177	304.695	11.2146	13.8414	4.24378	26.5863	15.7803	0	0
3MNGN_S_1	Male	Bulgan	Rural	Summer	1	42	Thursday	August	0.710438	176.865	8.53244	15.3962	4.67109	1.07998	0.44437	91.9437	4.4326	4.68535	1.33026	15.3881	247.438	11.904	0
3MNGN_S_2	Male	Bulgan	Rural	Summer	2	42	Friday	August	0.710438	376.462	23.011	25.3631	527.815	2.38087	1.92854	633.167	5.85312	131.408	7.24577	17.7278	423.903	31.514	0
3MNGN_S_3	Male	Bulgan	Rural	Summer	3	42	Saturday	August	0.710438	121.677	12.2661	14.182	255.19	1.07514	0.590195	338.261	3.62536	20.9636	8.99899	14.8832	310.455	15.12	0
3MNGN_W_1	Male	Bulgan	Rural	Winter	1	42	Monday	January	0.52755	89.7314	13.9772	15.0843	47.9865	1.21232	0.685034	48.3473	7.74911	13.6837	5.56449	17.8572	260.927	5.886	110.101
3MNGN_W_2	Male	Bulgan	Rural	Winter	2	42	Tuesday	January	0.659437	100.296	20.9185	19.2038	23.2883	1.33987	0.857144	131.121	8.94961	4.59666	13.2162	17.9329	371.976	20.148	55.0506
3MNGN_W_3	Male	Bulgan	Rural	Winter	3	42	Wedesday	January	0.659437	46.872	10.2162	9.76818	37.3696	0.820904	0.335378	146.171	5.42517	5.70113	9.95852	14.1637	217.991	20.84	88.337
4MNGN_S_1	Male	Bulgan	Rural	Summer	1	42	Thursday	August	0.710438	148.06	8.38797	11.5186	1319.17	1.28685	2.33871	1416.18	3.01378	141.746	8.63538	13.0183	59.6112	0	73.6142
4MNGN_S_2	Male	Bulgan	Rural	Summer	2	42	Friday	August	0.710438	238.901	21.9209	18.9735	138.427	1.88931	1.49653	176.925	2.63044	4.16231	22.4366	25.6104	816.858	10.05	66.9569
4MNGN_S_3	Male	Bulgan	Rural	Summer	3	42	Saturday	August	0.710438	65.1361	9.1003	8.47275	70.4761	0.885157	0.427467	128.372	4.06069	9.42998	3.31461	11.6061	330.604	2.91	156.446
4MNGN_W_1	Male	Bulgan	Rural	Winter	1	42	Monday	January	0.52755	36.6773	20.7244	20.012	72.6924	1.16198	0.571751	73.2712	9.97966	11.5439	1.91775	12.1245	30.3068	1.76	91.9403
4MNGN_W_2	Male	Bulgan	Rural	Winter	2	42	Tuesday	January	0.659437	446.998	41.3393	45.93	84.2446	2.62305	1.69067	84.8951	17.2835	26.9062	11.6339	36.8944	644.531	38.368	168.224
4MNGN_W_3	Male	Bulgan	Rural	Winter	3	42	Wedesday	January	0.659437	246.293	19.2739	15.5209	50.3022	1.30829	0.89843	50.7328	6.91865	7.28071	7.70312	18.4548	411.827	23.32	100.115
5MNGN_S_1	Male	Bulgan	Rural	Summer	1	42	Thursday	August	0.710438	137.419	10.3965	11.5065	678.852	1.25434	2.6281	721.029	3.10435	97.2033	4.23996	9.12383	127.226	0	75.4065
5MNGN_S_2	Male	Bulgan	Rural	Summer	2	42	Friday	August	0.710438	93.2677	7.11224	9.7049	384.988	1.07378	1.72754	439.197	3.4778	60.0707	2.09186	8.33357	58.9345	7.416	126.36
5MNGN_S_3	Male	Bulgan	Rural	Summer	3	42	Saturday	August	0.710438	65.4506	10.3317	12.8458	567.863	1.29069	0.682981	629.115	6.33496	41.8478	7.22268	12.0859	243.141	11.592	187.172
5MNGN_W_1	Male	Bulgan	Rural	Winter	1	42	Monday	January	0.52755	80.0781	29.3368	27.3007	280.263	1.56464	0.994037	326.691	11.986	18.3494	7.24717	19.7577	381.115	8.792	104.98
5MNGN_W_2	Male	Bulgan	Rural	Winter	2	42	Tuesday	January	0.659437	39.9527	7.3607	6.64565	221.12	0.837866	0.323404	271.042	4.78194	15.4	4.62404	10.5131	146.75	5.936	127.641
5MNGN_W_3	Male	Bulgan	Rural	Winter	3	42	Wedesday	January	0.659437	19.7651	4.61731	5.04605	37.0437	0.535985	0.238128	57.4025	2.88164	3.67499	1.74452	7.16278	34.6884	0	61.0678
6MNGN_S_1	Male	Bulgan	Rural	Summer	1	32	Thursday	August	1.35731	92.0546	16.7872	18.4951	3.64832	0.987569	1.17225	87.834	5.80993	14.4083	5.25449	12.3424	316.089	7.812	0
6MNGN_S_2	Male	Bulgan	Rural	Summer	2	32	Friday	August	1.35731	98.9737	17.983	21.9706	135.167	1.49399	0.789386	248.297	13.1048	58.728	6.70782	27.3187	61.672	22.008	32.0062
6MNGN_S_3	Male	Bulgan	Rural	Summer	3	32	Saturday	August	1.35731	122.387	9.402	17.1647	194.74	0.866834	0.817856	495.823	6.31221	32.744	3.0086	16.6391	106.45	32.22	32.0062
6MNGN_W_1	Male	Bulgan	Rural	Winter	1	32	Monday	January	1.0367	88.1285	17.6221	17.8135	15.5436	1.14833	0.483764	26.2658	8.83896	3.30819	3.13825	17.58	180.995	0	36.7431
6MNGN_W_2	Male	Bulgan	Rural	Winter	2	32	Tuesday	January	1.29587	145.013	22.5766	17.8253	52.0288	1.32408	0.71706	52.591	10.0392	8.5441	5.60345	16.7016	400.01	11.704	113.558
6MNGN_W_3	Male	Bulgan	Rural	Winter	3	32	Wedesday	January	1.29587	27.532	7.72282	9.57113	104.279	0.720512	0.29663	122.921	6.41854	10.449	2.1113	15.0756	54.9301	0	56.9239
7MNGN_S_1	Male	Bulgan	Rural	Summer	1	32	Thursday	August	1.35731	858.491	44.2569	58.6873	0	2.57396	3.37099	1006.63	11.2001	16.0922	22.4423	51.5956	2967.53	75.14	0
7MNGN_S_2	Male	Bulgan	Rural	Summer	2	32	Friday	August	1.35731	274.604	27.8095	44.1365	2.83059	3.91794	2.3415	617.197	16.1547	24.4657	16.1263	41.5278	567.141	45.084	0
7MNGN_S_3	Male	Bulgan	Rural	Summer	3	32	Saturday	August	1.35731	144.344	14.3586	18.8046	0	0.932091	0.321308	108.16	7.1312	11.1244	11.0444	18.8304	399.766	24.136	0
7MNGN_W_1	Male	Bulgan	Rural	Winter	1	32	Monday	January	1.0367	181.628	30.109	40.3212	124.78	1.84374	0.751866	134.337	16.5407	27.0339	4.96529	34.8199	405.282	2.816	0
7MNGN_W_2	Male	Bulgan	Rural	Winter	2	32	Tuesday	January	1.29587	358.079	23.8791	30.8994	128.544	1.69803	0.999045	157.022	11.1584	25.4524	8.07623	28.5766	474.493	19.184	15.7324
7MNGN_W_3	Male	Bulgan	Rural	Winter	3	32	Wedesday	January	1.29587	137.662	11.1326	15.1544	2385.95	2.10849	0.81103	2414.28	27.6149	40.8391	3.69879	8.27935	67.1381	0	0
8MNGN_S_1	Male	Bulgan	Rural	Summer	1	59	Thursday	August	0.535823	97.7834	8.03626	13.9517	117.82	1.32217	0.387976	207.122	6.19956	23.1224	1.17298	14.9565	297.735	14.28	265.267
8MNGN_S_2	Male	Bulgan	Rural	Summer	2	59	Friday	August	0.535823	117.653	14.3512	25.9073	767.583	2.24782	1.40163	898.864	8.5923	70.987	5.00192	21.5754	126.677	0	289.976
8MNGN_S_3	Male	Bulgan	Rural	Summer	3	59	Saturday	August	0.535823	257.77	34.6682	54.7665	6372.86	6.43321	1.98037	6409.68	89.24	70.0118	6.38628	39.9383	157.564	0	240.969
8MNGN_W_1	Male	Bulgan	Rural	Winter	1	59	Monday	January	0.447622	174.741	12.4064	15.5119	16.899	1.18521	0.287198	19.2471	7.75204	8.88965	2.36337	19.4614	245.278	0	45.0334
8MNGN_W_2	Male	Bulgan	Rural	Winter	2	59	Tuesday	January	0.559527	155.406	9.54954	14.3149	49.1244	1.29067	0.409923	127.123	7.16102	10.7144	1.66448	13.7386	62.086	0	119.071
8MNGN_W_3	Male	Bulgan	Rural	Winter	3	59	Wedesday	January	0.559527	324.443	19.4997	24.6359	54.06	1.41392	0.822661	61.7802	9.065	32.4157	6.93649	22.4221	413.888	20.392	0
9MNGN_S_1	Male	Bulgan	Rural	Summer	1	52	Thursday	August	0.535823	63.0708	6.77795	10.3058	33.2072	0.654377	0.707178	107.81	3.86227	21.3778	1.14455	10.4108	222.22	9.672	65.1645
9MNGN_S_2	Male	Bulgan	Rural	Summer	2	52	Friday	August	0.535823	131.932	19.1121	41.1654	205.069	2.07611	1.01915	245.765	16.5491	43.8143	2.46866	38.6616	120.376	0	145.436
9MNGN_S_3	Male	Bulgan	Rural	Summer	3	52	Saturday	August	0.535823	247.475	13.4381	15.0789	228.496	1.33067	0.968248	425.252	5.32943	27.1805	6.61835	13.835	217.816	25.808	172.705
9MNGN_W_1	Male	Bulgan	Rural	Winter	1	55	Monday	January	0.447622	103.428	16.4252	23.821	39.6839	1.32758	0.509247	145.016	11.2837	14.9131	4.72867	27.6833	247.334	2.8	83.9842
9MNGN_W_2	Male	Bulgan	Rural	Winter	2	55	Tuesday	January	0.559527	383.184	45.4787	46.6753	82.1267	2.97642	1.76976	196.283	20.2769	15.4394	14.1188	55.7526	884.539	22.088	32.1342
9MNGN_W_3	Male	Bulgan	Rural	Winter	3	55	Wedesday	January	0.559527	104.497	22.4661	25.5368	56.0838	1.51505	0.726083	71.6205	12.11	12.1535	3.72159	21.7694	133.55	6.6	127.256
10FDN_S_1	Female	Dornod	Rural	Summer	1	35	Monday	July	0.51753	117.216	22.9499	36.7284	274.716	2.47201	0.919893	298.605	18.1397	46.2664	5.11103	44.5422	352.988	0	271.302
10FDN_S_2	Female	Dornod	Rural	Summer	2	35	Tuesday	July	0.646912	121.254	17.234	15.7321	277.249	2.19582	0.708261	370.473	9.41516	17.9335	9.89341	23.5523	380.89	15.036	227.116
10FDN_S_3	Female	Dornod	Rural	Summer	3	35	Wedesday	July	0.646912	142.805	15.7687	26.9242	321.42	3.74802	1.3237	415.715	12.4318	15.9258	4.10453	31.4111	295.438	1.96	228.524
10FDN_W_1	Female	Dornod	Rural	Winter	1	35	Tuesday	January	0.579026	145.626	22.4029	22.5211	72.3112	1.50316	0.798295	180.824	11.693	6.99362	5.90461	30.9537	400.145	0	0
10FDN_W_2	Female	Dornod	Rural	Winter	2	35	Wedesday	January	0.579026	656.257	31.6625	50.8049	17635	7.97862	1.3455	17723	144.439	89.9886	11.9059	22.1826	361.078	20.37	23.6846
10FDN_W_3	Female	Dornod	Rural	Winter	3	35	Thursday	January	0.579026	159.976	18.9857	16.9599	119.424	1.62271	0.612367	182.498	9.38623	14.0563	6.87171	25.4703	519.381	5.94	149.789
1FDN_S_1	Female	Dornod	Rural	Summer	1	34	Monday	July	0.51753	174.01	20.6285	20.856	74.273	1.79074	1.01115	220.686	4.52782	6.77624	16.237	20.3982	540.113	38.02	100.755
1FDN_S_2	Female	Dornod	Rural	Summer	2	34	Tuesday	July	0.646912	156.647	15.4572	15.0709	219.774	1.97295	1.16441	550.423	3.68495	21.5742	5.10165	11.9613	313.64	53.792	323.808
1FDN_S_3	Female	Dornod	Rural	Summer	3	34	Wedesday	July	0.646912	18.6397	5.26182	6.27877	243.241	1.02809	0.305392	266.764	3.17333	18.768	1.60104	7.82935	101.057	15.9	235.882
1FDN_W_1	Female	Dornod	Rural	Winter	1	34	Tuesday	January	0.579026	84.6831	13.7608	9.66767	223.635	1.17165	0.672414	278.436	4.32481	20.4989	7.04138	6.87943	231.722	15.116	177.283
1FDN_W_2	Female	Dornod	Rural	Winter	2	34	Wedesday	January	0.579026	339.083	25.9085	22.1712	78.5466	1.59952	1.37325	160.013	8.98231	14.4829	11.4227	11.7699	366.239	48.852	126.601
1FDN_W_3	Female	Dornod	Rural	Winter	3	34	Thursday	January	0.579026	116.776	13.6568	16.2487	56.4343	1.31608	0.625169	56.4613	10.3563	7.02015	4.60485	23.7867	72.8	9.856	122.765
2FDN_S_1	Female	Dornod	Rural	Summer	1	54	Monday	July	0.496094	71.1098	4.55286	7.96692	277.992	1.4251	0.459647	325.317	3.66572	29.0851	2.15042	9.6356	29.8918	8.48	287.031
2FDN_S_2	Female	Dornod	Rural	Summer	2	54	Tuesday	July	0.620118	52.3479	3.69439	6.22153	333.713	1.4036	0.384447	373.848	4.16844	30.2794	1.70113	8.57227	32.2971	6.2	283.801
2FDN_S_3	Female	Dornod	Rural	Summer	3	54	Wedesday	July	0.620118	45.1313	5.52676	7.6602	1282.26	1.88852	0.43833	1287.55	16.6419	25.5856	1.36181	6.40867	24.2773	0	234.644
2FDN_W_1	Female	Dornod	Rural	Winter	1	54	Tuesday	January	0.579176	24.7302	4.87515	5.63772	85.7248	0.655904	0.284993	122.529	2.54892	11.6235	0.787239	4.66193	123.464	4.368	141.777
2FDN_W_2	Female	Dornod	Rural	Winter	2	54	Wedesday	January	0.579176	26.9773	4.04594	6.62945	51.1599	0.590144	0.174352	102.485	2.97386	10.4251	2.39848	7.14824	77.4751	9.356	120.75
2FDN_W_3	Female	Dornod	Rural	Winter	3	54	Thursday	January	0.579176	5.04272	1.19027	1.41216	42.2249	0.346238	0.0771983	48.0395	1.13569	5.7372	0.376108	2.5031	15.6353	0	99.1192
3FDN_S_1	Female	Dornod	Rural	Summer	1	54	Monday	July	0.496094	18.1388	4.69137	6.17661	218.551	1.34068	0.347964	258.456	3.24847	22.5539	1.57589	8.14648	79.3708	0	350.615
3FDN_S_2	Female	Dornod	Rural	Summer	2	54	Tuesday	July	0.620118	62.928	5.03604	5.49767	395.606	2.36802	0.461687	421.538	4.77915	31.0287	4.28512	9.68498	99.1198	5.572	459.064
3FDN_S_3	Female	Dornod	Rural	Summer	3	54	Wedesday	July	0.620118	97.7127	14.2658	20.7501	6632.84	5.11012	0.630948	6646.47	75.9848	39.8878	2.70821	16.0335	27.8011	2.85	383.846
3FDN_W_1	Female	Dornod	Rural	Winter	1	54	Tuesday	January	0.579176	37.9121	15.6983	16.9945	60.3132	1.09405	0.463362	90.2357	8.03266	10.5018	1.89388	12.6376	110.985	0.74	137.626
3FDN_W_2	Female	Dornod	Rural	Winter	2	54	Wedesday	January	0.579176	83.5622	4.51861	3.74645	58.0736	0.585114	0.339605	80.1923	1.54602	7.44005	2.12108	2.64763	63.7303	12.032	130.329
3FDN_W_3	Female	Dornod	Rural	Winter	3	54	Thursday	January	0.579176	170.646	16.173	12.2985	51.6261	0.981981	0.695317	81.8643	5.57296	7.47886	7.38364	7.78005	297.629	23	108.985
4FDN_S_1	Female	Dornod	Rural	Summer	1	49	Monday	July	0.496094	44.6805	6.94758	14.0847	200.461	1.11424	0.334772	229.399	6.03085	25.8058	1.84728	13.5071	45.1542	0	211.369
4FDN_S_2	Female	Dornod	Rural	Summer	2	49	Tuesday	July	0.620118	59.1828	9.37167	14.4171	367.321	1.28879	0.560289	413.054	9.05478	19.0602	1.7324	12.4854	130.33	0	173.601
4FDN_S_3	Female	Dornod	Rural	Summer	3	49	Wedesday	July	0.620118	55.6776	8.78808	12.4594	230.549	1.42973	0.55853	281.823	5.08151	29.8778	4.74047	12.2842	190.352	7.448	302.266
4FDN_W_1	Female	Dornod	Rural	Winter	1	49	Sunday	January	0.463341	187.951	36.0075	25.8137	132.899	2.16716	1.12357	301.687	14.2357	18.587	20.9331	17.2906	718.736	50.508	303.802
4FDN_W_2	Female	Dornod	Rural	Winter	2	49	Monday	January	0.463341	156.99	17.9722	16.3476	184.432	1.11832	0.694608	220.083	8.43994	14.6285	5.14241	12.5744	302.963	12.76	99.4265
4FDN_W_3	Female	Dornod	Rural	Winter	3	49	Tuesday	January	0.579176	132.897	10.7672	19.7769	293.013	1.44256	0.580643	332.299	8.32073	37.8397	4.51202	19.5753	62.2636	8.36	199.492
5FDN_S_1	Female	Dornod	Rural	Summer	1	51	Monday	July	0.496094	20.031	2.99813	3.27932	740.421	1.05746	0.362044	747.968	5.99002	35.7361	1.99941	5.21161	35.7296	0	251.208
5FDN_S_2	Female	Dornod	Rural	Summer	2	51	Tuesday	July	0.620118	20.4644	5.20968	5.96784	360.271	1.45587	0.361504	395.472	4.14632	28.6416	4.5977	8.47378	129.881	7.84	380.57
5FDN_S_3	Female	Dornod	Rural	Summer	3	51	Wedesday	July	0.620118	185.19	28.4438	46.22	3140.09	4.12179	1.12594	3158.86	64.0762	24.9691	4.81099	37.9986	95.8195	7.686	125.391
5FDN_W_1	Female	Dornod	Rural	Winter	1	51	Monday	January	0.463341	104.498	19.9842	24.262	2642.26	3.21925	0.777121	2664.51	48.2855	23.2661	3.14161	16.2955	77.5126	2.376	244.795
5FDN_W_2	Female	Dornod	Rural	Winter	2	51	Tuesday	January	0.579176	30.627	15.2786	14.4553	294.005	1.23252	0.492102	338.974	8.69163	17.7403	5.03766	11.361	212.631	7.168	173.08
5FDN_W_3	Female	Dornod	Rural	Winter	3	51	Wedesday	January	0.579176	188.681	38.3854	45.175	6000.86	5.98388	1.25746	6000.98	108.272	24.1972	5.38565	26.9316	35.5532	4.576	204.608
6FDN_S_1	Female	Dornod	Rural	Summer	1	34	Monday	July	0.51753	88.5469	16.4042	25.8552	1765.05	2.76233	0.756473	1839.58	33.4444	25.3408	3.33338	23.0747	135.753	0	210.755
6FDN_S_2	Female	Dornod	Rural	Summer	2	34	Tuesday	July	0.646912	91.917	20.4767	23.063	354.959	2.27314	1.16469	504.687	5.05293	30.9976	14.9089	22.0547	527.247	26.488	237.471
6FDN_S_3	Female	Dornod	Rural	Summer	3	34	Wedesday	July	0.646912	94.0294	11.8236	11.5154	200.55	2.00005	0.786822	240.792	12.6519	26.1567	4.16144	13.2	117.906	5.192	443.114
6FDN_W_1	Female	Dornod	Rural	Winter	1	34	Tuesday	January	0.579026	88.3791	16.4578	19.3094	1918.33	2.60122	1.06788	2272.64	29.4292	37.1857	3.84315	11.4159	145.026	0	213.939
6FDN_W_2	Female	Dornod	Rural	Winter	2	34	Wedesday	January	0.579026	74.3669	16.6264	15.1862	381.59	1.64375	1.12389	446.001	5.11925	36.3178	7.70895	7.88317	316.31	11.844	238.997
6FDN_W_3	Female	Dornod	Rural	Winter	3	34	Thursday	January	0.579026	83.1999	23.3275	26.3218	220.543	2.03763	0.994533	262.761	14.0908	26.5579	4.26058	26.3995	283.755	0	230.866
7FDN_S_1	Female	Dornod	Rural	Summer	1	50	Monday	July	0.496094	21.7488	5.99485	8.60623	162.317	1.24893	0.404828	206.477	2.91651	20.9668	4.3662	10.0366	123.545	7.448	257.128
7FDN_S_2	Female	Dornod	Rural	Summer	2	50	Tuesday	July	0.620118	85.9681	10.5997	12.2457	333.566	1.6675	0.744802	408.995	3.46817	35.8995	6.23717	13.0917	224.987	11.528	306.077
7FDN_S_3	Female	Dornod	Rural	Summer	3	50	Wedesday	July	0.620118	46.7837	7.14704	12.3525	91.9125	1.33293	0.722885	153.38	2.97337	12.5077	1.07759	11.3106	108.035	7.824	216.988
7FDN_W_1	Female	Dornod	Rural	Winter	1	50	Tuesday	January	0.579176	64.56	13.4903	9.83656	391.115	1.69747	0.581134	457.556	5.987	35.5193	9.25074	8.78212	217.911	13.336	356.933
7FDN_W_2	Female	Dornod	Rural	Winter	2	50	Wedesday	January	0.579176	102.572	10.2984	9.03351	397.64	1.55046	0.835996	441.186	3.67102	36.3932	4.19202	6.362	156.883	7.304	332.992
7FDN_W_3	Female	Dornod	Rural	Winter	3	50	Thursday	January	0.579176	38.966	14.3823	13.283	198.09	1.20392	0.527609	374.415	8.14088	23.3241	2.55781	9.40757	123.772	8.85	199.206
8FDN_S_1	Female	Dornod	Rural	Summer	1	41	Monday	July	0.51753	30.1835	3.32663	7.61044	175.759	1.01734	0.286891	176.236	5.10556	67.475	1.19741	3.61069	87.2281	0	351.389
8FDN_S_2	Female	Dornod	Rural	Summer	2	41	Tuesday	July	0.646912	38.1826	4.11881	4.15601	195.978	0.944921	0.489297	198.686	1.06666	21.9498	1.46368	3.37627	159.479	1.63	251.908
8FDN_S_3	Female	Dornod	Rural	Summer	3	41	Wedesday	July	0.646912	48.493	11.6003	16.9229	110.337	1.47446	0.586159	114.333	11.5455	12.1722	2.15473	11.8608	121.325	27.9	161.439
8FDN_W_1	Female	Dornod	Rural	Winter	1	41	Tuesday	January	0.579026	11.1569	3.92411	3.76972	48.0536	0.479773	0.161859	86.9363	2.47021	6.52014	0.621083	3.14425	26.5821	3.936	111.253
8FDN_W_2	Female	Dornod	Rural	Winter	2	41	Wedesday	January	0.579026	29.2066	12.0863	10.4479	107.776	1.25159	0.513052	124.533	6.16998	15.3338	1.57202	7.31525	164.872	2.544	254.769
8FDN_W_3	Female	Dornod	Rural	Winter	3	41	Thursday	January	0.579026	20.5794	9.50975	8.52356	83.9461	0.932311	0.314488	121.813	5.79018	11.9975	1.32265	6.61056	97.1173	4.392	198.438
9FDN_S_1	Female	Dornod	Rural	Summer	1	43	Monday	July	0.51753	43.148	14.4488	11.7421	177.424	1.8029	0.720117	237.686	6.43394	24.1634	6.952	8.56308	274.505	13.44	419.409
9FDN_S_2	Female	Dornod	Rural	Summer	2	43	Tuesday	July	0.646912	158.985	21.5589	21.7016	4854.55	6.0237	2.21752	5002.95	15.5467	287.148	14.515	22.6822	258.216	0	573.831
9FDN_S_3	Female	Dornod	Rural	Summer	3	43	Wedesday	July	0.646912	156.487	25.4547	37.3855	551.414	2.94266	1.51806	579.872	15.9169	55.6557	6.02084	34.0937	138.204	14.52	366.284
9FDN_W_1	Female	Dornod	Rural	Winter	1	43	Tuesday	January	0.579026	37.4001	7.08412	8.5252	270.74	0.935416	0.428787	300.447	5.35012	26.2091	1.85815	9.76305	65.737	7.2	172.429
9FDN_W_2	Female	Dornod	Rural	Winter	2	43	Wedesday	January	0.579026	164.088	18.544	27.493	3877.22	3.13714	0.494879	3947.66	38.6097	42.9075	8.28184	21.4416	239.622	14	224.811
9FDN_W_3	Female	Dornod	Rural	Winter	3	43	Thursday	January	0.579026	197.002	30.2956	45.7152	8377.81	6.88555	1.00457	8378.76	118.001	45.4154	3.76955	27.903	21.0032	0	238.126
10MDN_S_1	Male	Dornod	Rural	Summer	1	31	Monday	July	1.08585	108.216	15.431	22.9774	395.46	1.95655	1.39649	538.194	9.46778	668.549	3.26081	16.7497	129.836	25.684	198.95
10MDN_S_2	Male	Dornod	Rural	Summer	2	31	Tuesday	July	1.35731	78.4845	12.5795	16.1256	378.818	1.84646	0.670803	487.018	7.91517	37.9726	6.33772	17.8443	197.684	19.448	355.847
10MDN_S_3	Male	Dornod	Rural	Summer	3	31	Wedesday	July	1.35731	222.194	28.6185	46.5058	149.219	3.24023	2.5619	356.832	15.1186	47.3048	10.2295	40.6323	386.726	9.716	128.025
10MDN_W_1	Male	Dornod	Rural	Winter	1	31	Tuesday	January	1.29587	88.5648	15.8387	23.7523	183.329	2.22138	0.659137	294.108	9.97279	35.5216	8.82207	25.8555	479.791	15.176	433.824
10MDN_W_2	Male	Dornod	Rural	Winter	2	31	Wedesday	January	1.29587	55.4079	10.4966	16.267	153.432	1.63214	0.333223	153.855	8.125	31.2388	1.88323	18.6893	223.785	0	362.694
10MDN_W_3	Male	Dornod	Rural	Winter	3	31	Thursday	January	1.29587	78.5804	11.1826	26.5727	122.995	1.72856	0.449043	144.283	12.5315	32.766	1.44775	28.189	57.3137	0	290.744
1MDN_S_1	Male	Dornod	Rural	Summer	1	32	Monday	July	1.08585	119.652	18.5729	24.2532	172.085	2.08922	1.68337	241.871	5.27756	24.1814	2.75871	14.6916	347.375	0	231.084
1MDN_S_2	Male	Dornod	Rural	Summer	2	32	Tuesday	July	1.35731	127.773	19.5237	30.0117	98.171	2.05438	1.32843	199.943	10.633	25.406	2.73164	23.8449	320.423	0	213.801
1MDN_S_3	Male	Dornod	Rural	Summer	3	32	Wedesday	July	1.35731	191.287	32.0725	45.7986	110.84	2.9088	1.79724	182.443	16.2109	35.6818	3.81726	37.6923	602.117	83.7	250.544
1MDN_W_1	Male	Dornod	Rural	Winter	1	32	Tuesday	January	1.29587	120.664	13.6041	23.7344	3225.6	3.25078	0.621542	3242.99	45.4905	40.5748	2.66157	15.7953	30.455	0	227.069
1MDN_W_2	Male	Dornod	Rural	Winter	2	32	Wedesday	January	1.29587	73.6811	10.7379	14.3856	1705.16	2.24092	0.898661	1726.61	21.2194	36.15	2.62267	8.67669	100.682	0	239.15
2MDN_S_1	Male	Dornod	Rural	Summer	1	54	Monday	July	0.428658	85.3773	15.6261	16.8997	762.776	2.66713	1.11815	817.812	15.0562	54.6357	7.33244	14.1468	239.625	9.544	292.536
2MDN_S_2	Male	Dornod	Rural	Summer	2	54	Tuesday	July	0.535823	61.8363	9.30114	11.4575	1071.79	1.04545	0.525125	1090.34	4.35447	97.7968	4.43601	9.66266	152.964	0	166.558
2MDN_S_3	Male	Dornod	Rural	Summer	3	54	Wedesday	July	0.535823	461.175	24.8704	35.0887	7406.44	6.42494	2.0795	7415.62	82.0106	33.6078	2.67925	14.3712	232.582	3.384	296.214
2MDN_W_1	Male	Dornod	Rural	Winter	1	54	Tuesday	January	0.559527	316.126	25.752	48.8962	955.083	6.9967	2.2674	976.012	26.4089	142.389	7.07779	55.3715	154.261	13.992	1789.37
2MDN_W_2	Male	Dornod	Rural	Winter	2	54	Wedesday	January	0.559527	176.638	29.3404	30.7863	337.074	2.53474	1.01177	370.47	17.6371	38.318	6.39539	26.6987	412.347	11.176	402.125
2MDN_W_3	Male	Dornod	Rural	Winter	3	54	Thursday	January	0.559527	70.0752	12.4472	9.43657	299.736	1.42134	0.487076	300.015	7.46222	24.6909	3.14217	8.0808	185.881	5.72	324.03
3MDN_S_1	Male	Dornod	Rural	Summer	1	31	Monday	July	1.08585	93.2643	12.9494	16.4323	670.26	2.23286	1.22745	723.525	5.38329	63.4087	4.31998	13.3238	194.135	1.056	399.078
3MDN_S_2	Male	Dornod	Rural	Summer	2	31	Tuesday	July	1.35731	137.536	18.1491	23.5997	747.125	2.3219	1.17567	838.817	8.50879	74.4026	10.1178	22.4562	387.613	13.068	350.715
3MDN_S_3	Male	Dornod	Rural	Summer	3	31	Wedesday	July	1.35731	91.0231	16.2386	24.0931	142.959	1.47836	0.430424	187.856	10.4113	29.7807	6.33606	25.4385	385.783	9.296	184.466
3MDN_W_1	Male	Dornod	Rural	Winter	1	31	Tuesday	January	1.29587	241.316	16.4014	19.7119	881.042	2.02045	1.56824	987.69	6.2432	63.7975	8.51061	14.6322	280.349	14.344	231.782
3MDN_W_2	Male	Dornod	Rural	Winter	2	31	Wedesday	January	1.29587	301.834	56.8026	50.563	1930.73	4.13926	2.37578	2132.64	29.1621	95.6835	16.7518	39.5638	587.957	0	289.592
3MDN_W_3	Male	Dornod	Rural	Winter	3	31	Thursday	January	1.29587	50.8294	7.56481	8.85047	340.63	0.953765	0.952395	346.415	0.542542	32.3198	1.56654	2.20398	146.288	0	100.371
4MDN_S_1	Male	Dornod	Rural	Summer	1	51	Monday	July	0.428658	232.87	30.815	48.234	4913.44	6.89163	1.57489	5183.5	88.7004	31.8374	4.34934	38.2103	108.574	0	303.894
4MDN_S_2	Male	Dornod	Rural	Summer	2	51	Tuesday	July	0.535823	122.056	13.8704	23.3661	1221.29	6.22256	1.51264	1305.46	19.305	95.3597	3.42623	29.0148	122.093	0	1419.15
4MDN_S_3	Male	Dornod	Rural	Summer	3	51	Wedesday	July	0.535823	112.051	10.0979	15.5539	490.305	2.95724	0.990385	536.878	8.04003	39.9591	2.85405	17.3043	162.835	0	335.297
4MDN_W_1	Male	Dornod	Rural	Winter	1	51	Tuesday	January	0.559527	73.8798	22.6799	23.4851	74.7933	1.60341	0.851447	98.5658	11.524	16.3468	2.96646	17.1408	349.45	0	176.802
4MDN_W_2	Male	Dornod	Rural	Winter	2	51	Wedesday	January	0.559527	173.958	39.7792	43.2351	230.412	3.29691	2.53407	295.216	14.9735	28.7767	7.38712	25.0642	686.754	7.812	295.455
4MDN_W_3	Male	Dornod	Rural	Winter	3	51	Thursday	January	0.559527	63.6733	22.8347	19.7711	118.05	1.64408	1.06098	118.508	9.4456	13.5346	2.71589	10.8483	357.606	0	186.02
5MDN_S_1	Male	Dornod	Rural	Summer	1	45	Monday	July	0.428658	104.865	15.4773	19.7951	209.723	2.49743	1.24591	380.931	8.65926	28.3267	3.23295	22.3195	167.024	19.632	478.375
5MDN_S_2	Male	Dornod	Rural	Summer	2	45	Tuesday	July	0.535823	123.552	20.5969	22.3142	432.018	3.05284	1.70483	526.411	9.32973	39.1879	4.44307	21.4839	346.82	0	560.654
5MDN_S_3	Male	Dornod	Rural	Summer	3	45	Wedesday	July	0.535823	77.841	11.2829	15.33	227.902	2.42827	0.968574	273.032	7.13913	30.5995	2.37728	17.7176	247.556	0	531.91
5MDN_W_1	Male	Dornod	Rural	Winter	1	45	Tuesday	January	0.559527	310.698	42.4765	41.1024	1577.99	4.79729	2.65986	1682.07	32.2821	44.9172	16.957	23.5493	479.675	40.26	240.046
5MDN_W_2	Male	Dornod	Rural	Winter	2	45	Wedesday	January	0.559527	218.789	26.511	39.6149	802.826	2.46742	1.29388	1064.88	19.9962	79.7501	8.33177	39.8347	463.159	5.456	190.257
5MDN_W_3	Male	Dornod	Rural	Winter	3	45	Thursday	January	0.559527	84.0204	4.58933	5.18593	519.097	0.768053	0.421505	540.746	3.51702	32.6839	3.61229	5.59095	72.71	6.688	135.194
6MDN_S_1	Male	Dornod	Rural	Summer	1	42	Monday	July	0.56835	31.7482	5.77648	12.6735	404.115	3.06632	0.502737	404.234	9.09541	60.5969	1.30321	17.9941	0.148457	0	948.471
6MDN_S_2	Male	Dornod	Rural	Summer	2	42	Tuesday	July	0.710438	54.5091	9.95309	15.1286	541.725	3.88417	0.899562	606.095	8.85457	75.9084	5.92297	19.9669	159.5	14.932	1148.13
6MDN_S_3	Male	Dornod	Rural	Summer	3	42	Wedesday	July	0.710438	207.86	27.2426	37.8913	2113	5.25719	1.9434	2194.68	38.0864	64.2967	8.4663	30.167	332.578	9.604	775.317
6MDN_W_1	Male	Dornod	Rural	Winter	1	42	Tuesday	January	0.659437	284.291	8.21119	8.68543	12.1738	0.930575	0.517272	185.175	1.32341	1.08249	3.41927	3.16607	97.7545	11.88	19.2037
6MDN_W_2	Male	Dornod	Rural	Winter	2	42	Wedesday	January	0.659437	101.471	11.4905	9.39121	208.314	1.82212	0.594988	251.911	5.76375	28.8304	6.42097	9.02224	215.748	16.744	490.435
6MDN_W_3	Male	Dornod	Rural	Winter	3	42	Thursday	January	0.659437	4.42065	0.818054	0.67839	229.652	0.876171	0.163966	235.974	1.33023	23.878	0.885442	2.34842	0.482353	0	303.212
7MDN_S_1	Male	Dornod	Rural	Summer	1	35	Monday	July	0.56835	145.409	22.619	29.7943	144.767	2.76157	1.46177	259.823	11.6261	20.1553	5.83785	28.8512	282.077	7.128	314.3
7MDN_S_2	Male	Dornod	Rural	Summer	2	35	Tuesday	July	0.710438	250.629	21.4515	23.9453	436.04	3.12336	0.966119	612.881	9.66733	58.4158	7.22032	23.6153	388.042	86.7	696.966
7MDN_S_3	Male	Dornod	Rural	Summer	3	35	Wedesday	July	0.710438	181.9	26.3717	33.8066	173.813	3.2997	1.84111	313.271	7.48059	25.6031	12.4045	29.5095	588.423	32.436	405.198
7MDN_W_1	Male	Dornod	Rural	Winter	1	35	Tuesday	January	0.659437	597.084	34.2523	30.5246	81.2259	2.27681	1.95583	160.504	10.6742	13.1984	17.5143	22.7292	604.069	63.088	148.253
7MDN_W_2	Male	Dornod	Rural	Winter	2	35	Wedesday	January	0.659437	969.82	58.2781	55.558	957.124	5.1177	5.80326	1042.08	4.84593	84.7215	23.462	20.67	1294.76	92.976	376.392
7MDN_W_3	Male	Dornod	Rural	Winter	3	35	Thursday	January	0.659437	76.7159	33.5488	31.8533	489.787	2.81869	1.53357	509.332	14.6376	45.3867	4.83531	19.0941	248.972	0	393.932
8MDN_S_1	Male	Dornod	Rural	Summer	1	39	Monday	July	0.56835	517.769	37.9951	39.4304	750.816	4.2226	2.02893	918.023	16.1291	88.8928	27.7826	37.5188	916.745	79.088	904.917
8MDN_S_2	Male	Dornod	Rural	Summer	2	39	Tuesday	July	0.710438	343.934	20.8897	19.2216	527.914	2.69255	1.31911	737.421	7.02314	62.6634	14.9005	17.4098	464.631	45.828	600.347
8MDN_S_3	Male	Dornod	Rural	Summer	3	39	Wedesday	July	0.710438	374.302	32.7518	64.0821	377.833	5.50779	2.9751	1897.05	23.2582	55.982	9.69481	59.0058	240.204	21.564	203.346
8MDN_W_1	Male	Dornod	Rural	Winter	1	39	Tuesday	January	0.659437	100.15	18.703	15.2501	228.313	1.67279	0.47252	301.218	9.42957	111.148	9.18177	13.9893	354.955	42.794	147.868
8MDN_W_2	Male	Dornod	Rural	Winter	2	39	Wedesday	January	0.659437	168.711	9.80296	12.9438	42.1029	0.829165	0.594906	70.607	4.3374	10.8162	4.03193	11.1202	183.983	14.52	87.8249
8MDN_W_3	Male	Dornod	Rural	Winter	3	39	Thursday	January	0.659437	53.6657	11.2244	10.3807	344.933	1.17477	0.410716	362.008	6.42711	29.3805	4.13501	16.7038	223.049	0	151.697
9MDN_S_1	Male	Dornod	Rural	Summer	1	49	Tuesday	July	0.535823	365.996	44.999	76.5513	7598.8	8.6526	2.27732	7606.56	133.118	64.4052	5.72744	48.2781	135.165	0	322.267
9MDN_S_2	Male	Dornod	Rural	Summer	2	49	Wedesday	July	0.535823	299.484	39.714	63.4778	1966.95	5.0588	2.80674	1988.65	44.8066	33.3071	5.87261	39.3225	316.566	11.088	271.498
9MDN_W_1	Male	Dornod	Rural	Winter	1	49	Tuesday	January	0.559527	89.9039	17.9987	18.1248	240.527	1.48193	0.853902	240.82	8.92112	16.6566	3.40527	14.9129	174.04	4.488	180.072
9MDN_W_2	Male	Dornod	Rural	Winter	2	49	Wedesday	January	0.559527	172.209	25.8047	23.2787	426.608	2.42502	1.36153	476.141	9.67547	51.2082	9.55319	14.7527	336.168	22.624	404.976
9MDN_W_3	Male	Dornod	Rural	Winter	3	49	Thursday	January	0.559527	60.4253	19.9448	16.91	232.415	1.81874	0.758033	289.425	9.47637	27.8878	8.2565	17.3498	397.313	12.208	302.927
10FKHN_S_1	Female	Khovd	Rural	Summer	1	30	Saturday	July	1.10244	52.8069	3.99002	5.34386	43.3164	0.594499	0.3106	58.7876	1.40603	5.8949	1.64379	5.1475	75.4495	4.576	98.707
10FKHN_S_2	Female	Khovd	Rural	Summer	2	30	Sunday	July	0.88195	69.6477	6.03354	6.96677	44.9021	0.712173	0.366418	60.2877	2.35231	6.05904	2.09493	7.37091	83.9193	4.4	101.652
10FKHN_S_3	Female	Khovd	Rural	Summer	3	30	Monday	July	0.88195	57.0609	4.65109	5.68702	123.885	0.60068	0.401087	135.568	1.9077	18.6926	1.92165	5.10489	38.008	5.162	70.6696
1FKHN_S_1	Female	Khovd	Rural	Summer	1	45	Saturday	July	0.620118	188.875	24.1907	27.3125	47.6377	2.10966	1.70701	186.071	4.10461	7.0945	14.7203	20.1088	612.976	38.448	104.596
1FKHN_S_2	Female	Khovd	Rural	Summer	2	45	Sunday	July	0.496094	117.509	8.08346	9.40119	71.8688	0.957057	0.734517	82.7642	1.82987	10.4964	3.16037	6.56113	153.478	11.582	115.23
1FKHN_S_3	Female	Khovd	Rural	Summer	3	45	Monday	July	0.496094	284.288	12.0513	10.7352	154.051	1.10355	0.983192	196.451	2.41249	17.7202	6.83017	7.20616	235.923	35.144	156.195
1FKHN_W_1	Female	Khovd	Rural	Winter	1	45	Tuesday	January	0.579176	122.13	16.851	19.9921	123.601	2.02252	1.08156	165.739	6.04219	12.1223	8.19929	20.7226	282.788	7.784	176.418
1FKHN_W_2	Female	Khovd	Rural	Winter	2	45	Wedesday	January	0.579176	74.4775	12.3339	11.3609	281.735	1.3984	0.867602	405.084	4.77553	13.6373	4.24254	11.0459	180.676	2.024	127.385
1FKHN_W_3	Female	Khovd	Rural	Winter	3	45	Thursday	January	0.579176	316.649	18.4916	16.7039	170.382	1.67531	1.12772	246.557	3.82728	12.1003	13.9252	14.1532	470.039	42.516	141.851
2FKHN_S_1	Female	Khovd	Rural	Summer	1	40	Saturday	July	0.646912	30.9782	4.8823	4.06284	61.4161	0.627298	0.21972	88.1539	2.22952	8.41517	3.72354	6.0718	195.016	7.264	145.18
2FKHN_S_2	Female	Khovd	Rural	Summer	2	40	Sunday	July	0.51753	76.6142	7.76005	14.4197	701.632	1.48076	0.698104	745.095	6.32498	89.7081	4.39945	16.0557	155.082	2.09	261.731
2FKHN_S_3	Female	Khovd	Rural	Summer	3	40	Monday	July	0.51753	227.996	17.0511	21.1637	2864.92	2.87457	0.885099	2868.55	41.8567	16.2717	5.01748	13.1438	150.747	16.368	107.336
2FKHN_W_1	Female	Khovd	Rural	Winter	1	40	Tuesday	January	0.579026	988.632	42.6982	33.3378	61.7037	2.5896	3.02402	94.1983	4.42367	5.96377	23.2782	20.147	931.683	98.384	8.26844
2FKHN_W_2	Female	Khovd	Rural	Winter	2	40	Wedesday	January	0.579026	332.32	16.2888	13.5683	10.8625	1.1358	0.92013	76.9454	3.16584	0.6393	9.56179	11.7993	362.941	31.088	0
2FKHN_W_3	Female	Khovd	Rural	Winter	3	40	Thursday	January	0.579026	311.85	17.8122	14.3146	22.7658	1.23129	0.897666	47.7214	4.93482	1.13212	9.31177	14.9616	403.12	29.54	0
3FKHN_S_1	Female	Khovd	Rural	Summer	1	52	Saturday	July	0.620118	194.76	9.5979	9.80972	136.619	1.3775	0.738558	151.134	3.53112	20.0212	4.92924	8.51587	180.031	18.744	302.266
3FKHN_S_2	Female	Khovd	Rural	Summer	2	52	Sunday	July	0.496094	289.673	18.2947	21.0758	229.81	1.72847	1.05551	243.195	7.24761	32.303	7.73774	18.6787	388.836	24.552	235.615
3FKHN_S_3	Female	Khovd	Rural	Summer	3	52	Monday	July	0.496094	255.957	11.0411	8.68536	182.696	1.27092	0.88035	182.759	2.63158	17.4373	10.0363	6.35425	224.477	27.104	247.216
3FKHN_W_1	Female	Khovd	Rural	Winter	1	52	Tuesday	January	0.579176	180.003	10.7355	9.18412	91.0244	1.16642	0.667612	124.432	4.01568	11.506	4.68015	10.489	205.038	15.224	199.204
3FKHN_W_2	Female	Khovd	Rural	Winter	2	52	Wedesday	January	0.579176	141.647	8.96372	6.73742	66.8691	0.629832	0.372817	113.587	2.78405	6.42298	6.67033	8.24346	232.485	16.74	13.6892
3FKHN_W_3	Female	Khovd	Rural	Winter	3	52	Thursday	January	0.579176	119.068	5.43003	4.44139	46.1728	0.479064	0.251333	77.6821	1.84891	4.28297	2.0393	5.41096	103.936	4.4	8.98992
4FKHN_S_1	Female	Khovd	Rural	Summer	1	54	Saturday	July	0.620118	191.664	17.4738	28.9861	798.94	2.18809	0.842264	977.528	23.5609	24.6086	3.89355	26.89	149.953	7.744	170.017
4FKHN_S_2	Female	Khovd	Rural	Summer	2	54	Sunday	July	0.496094	171.32	17.3298	26.0205	2219.6	3.23115	0.833614	2278.87	40.9634	30.9569	4.01669	21.495	102.69	14.896	331.518
4FKHN_S_3	Female	Khovd	Rural	Summer	3	54	Monday	July	0.496094	374.62	26.1408	46.5102	99.488	2.37869	1.31758	119.778	18.5156	36.0576	7.93026	43.3858	253.38	28.952	172.476
4FKHN_W_1	Female	Khovd	Rural	Winter	1	54	Tuesday	January	0.579176	131.093	7.04975	7.99749	42.426	0.692274	0.39096	46.7669	2.79194	8.87827	2.84271	7.13118	146.676	10.384	91.9217
4FKHN_W_2	Female	Khovd	Rural	Winter	2	54	Wedesday	January	0.579176	503.162	35.4112	59.8122	8173.13	6.89287	1.1468	8185.18	86.1179	77.8768	6.52181	40.5937	111.934	14.872	268.98
4FKHN_W_3	Female	Khovd	Rural	Winter	3	54	Thursday	January	0.579176	168.726	16.2026	13.7584	122.858	1.77056	0.626438	123.345	8.19339	17.7239	5.22842	20.4392	335.108	9.768	282.55
5FKHN_S_1	Female	Khovd	Rural	Summer	1	24	Saturday	July	1.10244	373.241	23.8699	15.7721	27.4126	1.40908	1.22374	52.3602	2.25145	4.50989	8.20442	9.73604	438.297	20.24	37.7673
5FKHN_S_2	Female	Khovd	Rural	Summer	2	24	Sunday	July	0.88195	184.502	8.74428	10.0512	230.832	1.29086	0.56509	296.652	3.92565	64.06	3.83089	9.23699	115.595	19.424	110.229
5FKHN_S_3	Female	Khovd	Rural	Summer	3	24	Monday	July	0.88195	401.476	18.2126	12.8931	329.849	1.75216	1.34386	357.839	3.14068	26.5576	10.0504	9.48881	340.629	39.776	184.996
5FKHN_W_1	Female	Khovd	Rural	Winter	1	24	Tuesday	January	1.1982	271.556	11.4185	9.28177	126.903	1.21131	0.91471	137.209	2.04914	11.8878	6.69274	6.41761	278.889	27.544	184.942
5FKHN_W_2	Female	Khovd	Rural	Winter	2	24	Wedesday	January	1.1982	174.853	19.3299	25.7124	76.0548	1.39923	0.658818	122.911	10.3781	46.8153	4.44491	22.7984	427.422	100.87	136.346
5FKHN_W_3	Female	Khovd	Rural	Winter	3	24	Thursday	January	1.1982	224.932	20.0916	21.6164	89.4321	1.7197	0.959542	182.441	9.47663	17.0148	11.5099	23.6981	391.521	30.164	192.805
6FKHN_S_1	Female	Khovd	Rural	Summer	1	40	Saturday	July	0.646912	54.1617	11.2657	9.76864	113.744	1.23838	0.340138	181.708	5.3833	17.4778	6.5707	13.4518	217.839	11.621	263.695
6FKHN_S_2	Female	Khovd	Rural	Summer	2	40	Sunday	July	0.51753	339.265	20.4334	18.0687	593.447	2.30471	1.75575	655.329	4.16456	32.2714	13.7594	12.0962	362.22	26.646	299.194
6FKHN_S_3	Female	Khovd	Rural	Summer	3	40	Monday	July	0.51753	173.006	20.299	17.1393	234.744	2.23908	1.1119	339.019	7.66843	29.0028	14.033	19.8846	453.961	31.436	384.788
6FKHN_W_1	Female	Khovd	Rural	Winter	1	40	Tuesday	January	0.579026	117.78	10.3152	7.87561	170.412	0.886481	0.481812	186.146	4.71677	11.9752	3.63423	6.82382	174.975	10.12	136.09
6FKHN_W_2	Female	Khovd	Rural	Winter	2	40	Wedesday	January	0.579026	146.41	9.28965	6.45735	94.1287	0.899078	0.561742	114.721	2.66274	12.894	5.60523	4.28423	192.612	19.408	176.062
6FKHN_W_3	Female	Khovd	Rural	Winter	3	40	Thursday	January	0.579026	97.0388	10.6514	9.38601	24.9957	0.728978	0.360386	28.9422	5.02993	4.67736	2.58002	9.70813	191.843	5.192	55.5553
7FKHN_S_1	Female	Khovd	Rural	Summer	1	28	Saturday	July	1.10244	235.261	14.1897	12.758	303.283	2.6613	1.41691	348.281	4.92994	36.9797	6.8913	11.7781	243.549	21.1552	546.319
7FKHN_S_2	Female	Khovd	Rural	Summer	2	28	Sunday	July	0.88195	316.307	21.9587	25.7275	3416.56	3.56448	1.23652	3432.23	47.4265	22.5897	10.7463	16.1128	226.859	25.888	197.591
7FKHN_S_3	Female	Khovd	Rural	Summer	3	28	Monday	July	0.88195	96.3363	3.60774	10.6308	12.8136	0.566343	0.249677	81.9689	2.40292	4.30596	0.809099	6.50478	25.3143	11.136	22.2763
7FKHN_W_1	Female	Khovd	Rural	Winter	1	28	Tuesday	January	1.1982	137.456	20.9326	26.4916	63.1268	2.23952	1.41603	63.7421	4.95855	10.5583	4.26294	22.1604	480.69	4.224	145.82
7FKHN_W_2	Female	Khovd	Rural	Winter	2	28	Wedesday	January	1.1982	163.547	9.79414	9.62405	34.9499	0.835304	0.525448	69.3607	4.40263	4.42054	3.94176	11.7405	168.802	10.472	56.3308
7FKHN_W_3	Female	Khovd	Rural	Winter	3	28	Thursday	January	1.1982	206.733	21.1773	24.5973	1745.91	2.79828	1.0338	1830.26	27.8817	17.7113	12.1319	20.1665	389.599	30.712	179.363
8FKHN_S_1	Female	Khovd	Rural	Summer	1	33	Saturday	July	1.10244	129.989	5.18029	3.38277	201.275	0.633371	0.494134	205.685	0.695417	23.43	3.73806	2.09994	103.378	13.992	118.679
8FKHN_S_2	Female	Khovd	Rural	Summer	2	33	Sunday	July	0.88195	130.635	6.87093	5.08752	528.492	1.44329	0.765706	539.666	1.74986	59.3884	5.26676	5.86419	337.385	11.846	366.791
8FKHN_S_3	Female	Khovd	Rural	Summer	3	33	Monday	July	0.88195	85.4456	20.5491	19.5508	116.989	1.31437	0.45957	185.484	9.65983	17.2492	8.91634	25.38	477.46	84.516	97.5548
9FKHN_S_1	Female	Khovd	Rural	Summer	1	44	Saturday	July	0.646912	157.74	18.2746	19.7126	644.062	3.70248	2.25104	645.463	5.21894	54.6444	3.58555	9.66889	325.589	6.424	747.271
9FKHN_S_2	Female	Khovd	Rural	Summer	2	44	Sunday	July	0.51753	133.858	9.10554	10.1875	633.136	2.81975	0.944124	705.186	4.44478	62.4013	4.40641	12.0809	196.852	21.032	698.039
9FKHN_S_3	Female	Khovd	Rural	Summer	3	44	Monday	July	0.51753	58.8242	9.14283	11.3321	514.186	2.4864	1.06128	573.68	3.38237	49.8109	2.15525	9.56712	177.944	9.024	538.562
9FKHN_W_1	Female	Khovd	Rural	Winter	1	44	Tuesday	January	0.579026	213.79	15.0518	21.4889	1825.6	2.22225	0.710833	1833.9	34.5952	4.64838	3.84183	15.5262	88.4381	11.88	0
9FKHN_W_2	Female	Khovd	Rural	Winter	2	44	Wedesday	January	0.579026	113.627	5.53886	6.05827	22.962	0.584255	0.338487	28.0791	1.53425	1.28007	3.02062	5.42014	105.665	7.04	4.01786
9FKHN_W_3	Female	Khovd	Rural	Winter	3	44	Thursday	January	0.579026	217.596	8.25738	6.80353	5.94	0.631625	0.557935	6.03245	0.849125	0.358164	4.18486	4.56617	181.102	17.424	0
10MKHN_S_1	Male	Khovd	Rural	Summer	1	52	Saturday	July	0.535823	139.975	7.38431	6.38414	1414.78	1.38064	0.825367	1448.91	8.94549	74.242	6.36229	8.50138	139.15	17.114	216.49
10MKHN_S_2	Male	Khovd	Rural	Summer	2	52	Sunday	July	0.428658	109.375	19.1329	26.6417	523.915	2.98924	1.19759	620.445	15.6502	57.6853	6.58174	39.1704	269.359	16.478	588.242
10MKHN_S_3	Male	Khovd	Rural	Summer	3	52	Monday	July	0.428658	167.712	11.0102	10.5483	372.326	1.8647	0.857401	402.63	5.85325	46.4381	5.89821	13.5524	146.676	15.928	498.241
10MKHN_W_1	Male	Khovd	Rural	Winter	1	52	Tuesday	January	0.559527	238.491	43.2529	35.9627	155.38	2.8209	1.43109	155.912	18.9918	21.7702	8.02335	22.803	430.173	19.536	351.556
10MKHN_W_2	Male	Khovd	Rural	Winter	2	52	Wedesday	January	0.559527	379.422	32.0731	26.078	368.083	2.52676	1.60266	388.613	12.9558	27.7976	10.4048	16.4466	388.291	35.931	352.836
10MKHN_W_3	Male	Khovd	Rural	Winter	3	52	Thursday	January	0.559527	154.835	9.54464	10.4744	142.654	1.6319	0.639425	163.279	5.21892	19.1575	4.1529	15.1784	431.796	5.83	337.217
1MKHN_S_1	Male	Khovd	Rural	Summer	1	38	Saturday	July	0.710438	246.377	15.9597	17.6622	272.848	1.29801	0.955911	355.047	5.7336	38.1859	7.25902	15.1969	307.379	21.12	130.457
1MKHN_S_2	Male	Khovd	Rural	Summer	2	38	Sunday	July	0.56835	263.936	11.2601	7.77174	614.475	1.13762	1.0783	637.662	1.39715	71.0666	8.99964	4.94122	227.226	28.88	141.467
1MKHN_S_3	Male	Khovd	Rural	Summer	3	38	Monday	July	0.56835	255.832	16.8166	16.6655	353.643	1.92782	1.03227	422.438	6.05415	44.3058	12.3045	15.3611	400.454	36.826	363.59
1MKHN_W_1	Male	Khovd	Rural	Winter	1	38	Tuesday	January	0.659437	91.3103	6.67418	5.88759	4.61401	0.450161	0.278329	54.9598	2.08628	0.96869	2.39832	6.65159	183.423	3.96	0
1MKHN_W_2	Male	Khovd	Rural	Winter	2	38	Wedesday	January	0.659437	333.884	17.97	16.8752	44.8194	1.7268	0.969034	135.398	3.16384	5.93312	13.9953	15.1601	466.255	38.144	91.4096
1MKHN_W_3	Male	Khovd	Rural	Winter	3	38	Thursday	January	0.659437	216.958	20.2094	29.1783	97.0454	1.96793	0.613421	97.7477	12.3397	31.3272	4.38993	30.2762	440.655	7.128	223.659
2MKHN_S_1	Male	Khovd	Rural	Summer	1	32	Saturday	July	1.35731	173.853	27.6438	42.2885	5846.23	5.51987	0.958978	5896.95	87.415	48.4843	7.32291	31.2896	154.08	8.4	266.675
2MKHN_S_2	Male	Khovd	Rural	Summer	2	32	Sunday	July	1.08585	69.2574	7.86804	12.2465	433.713	1.48892	0.408502	452.005	6.25856	36.65	3.05915	14.7357	159.762	0	146.46
2MKHN_S_3	Male	Khovd	Rural	Summer	3	32	Monday	July	1.08585	89.3327	14.1164	28.1709	190.807	1.55416	0.597258	199.195	11.821	25.7264	4.06429	27.4735	162.129	0	160.671
2MKHN_W_1	Male	Khovd	Rural	Winter	1	32	Tuesday	January	1.29587	509.351	23.4243	35.5187	118.138	2.75127	1.33123	155.123	8.60594	13.0179	10.1422	22.8755	385.322	28.62	137.242
2MKHN_W_2	Male	Khovd	Rural	Winter	2	32	Wedesday	January	1.29587	38.208	5.22844	7.17894	28.4957	0.626158	0.25283	50.3096	3.39528	3.57378	1.73236	9.76768	75.0131	2.664	56.2028
2MKHN_W_3	Male	Khovd	Rural	Winter	3	32	Thursday	January	1.29587	261.436	28.0102	35.0213	238.076	3.5679	1.50222	330.283	14.4493	28.9426	9.94914	41.96	400.27	14.576	511.781
3MKHN_S_1	Male	Khovd	Rural	Summer	1	47	Saturday	July	0.535823	248.41	10.8821	8.15601	379.449	2.31712	1.04816	389.687	2.94067	44.3687	6.72787	7.17746	197.03	26.664	763.205
3MKHN_S_2	Male	Khovd	Rural	Summer	2	47	Sunday	July	0.428658	185.81	11.4481	12.329	538.861	2.52296	1.16591	615.807	4.19208	60.1166	6.06278	13.7468	429.103	25.349	644.755
3MKHN_S_3	Male	Khovd	Rural	Summer	3	47	Monday	July	0.428658	80.979	11.216	9.52395	560.621	3.35215	0.946163	600.38	4.96655	64.0151	3.93265	12.9848	475.933	9.324	998.441
3MKHN_W_1	Male	Khovd	Rural	Winter	1	47	Tuesday	January	0.559527	236.524	16.3813	26.622	1908.92	2.699	0.778473	1931.66	37.3941	4.96674	3.4123	21.3772	53.573	7.128	0
3MKHN_W_2	Male	Khovd	Rural	Winter	2	47	Wedesday	January	0.559527	426.421	37.8608	56.2681	5735.68	6.15703	1.40599	5764.18	107.075	14.7316	6.75108	40.7914	159.14	13.64	0
3MKHN_W_3	Male	Khovd	Rural	Winter	3	47	Thursday	January	0.559527	232.109	7.8877	6.29161	142.241	1.09492	0.592552	144.488	1.39465	15.2819	4.19418	5.13396	162.566	15.928	145.825
4MKHN_S_1	Male	Khovd	Rural	Summer	1	33	Monday	July	0.56835	119.009	8.17092	11.7214	132.596	0.773732	0.502163	218.9	4.08582	16.2205	3.29438	10.6757	118.716	16.56	80.3995
4MKHN_S_2	Male	Khovd	Rural	Summer	2	33	Tuesday	July	0.710438	166.037	17.9879	25.6349	211.428	1.62017	0.750386	743.196	10.4201	29.6902	9.52917	26.1147	274.426	18.884	134.17
4MKHN_S_3	Male	Khovd	Rural	Summer	3	33	Wedesday	July	0.710438	290.374	18.7459	23.8144	338.371	1.79223	1.22208	1149.02	7.91458	45.2712	8.75582	21.3357	275.479	39.976	198.799
4MKHN_W_1	Male	Khovd	Rural	Winter	1	33	Tuesday	January	0.659437	57.7391	10.1697	9.11267	87.0244	1.08118	0.437526	196.591	3.77056	10.1689	6.56773	11.317	340.042	10.574	165.152
4MKHN_W_2	Male	Khovd	Rural	Winter	2	33	Wedesday	January	0.659437	305.177	22.7612	24.8249	282.686	2.1275	1.21121	327.788	9.70284	28.8333	10.7511	24.2195	595.488	31.376	267.595
4MKHN_W_3	Male	Khovd	Rural	Winter	3	33	Thursday	January	0.659437	412.665	19.6641	13.6749	90.9754	1.408	1.36738	118.122	3.27603	10.13	10.3938	6.88961	381.003	44.264	174.626
5MKHN_S_1	Male	Khovd	Rural	Summer	1	28	Saturday	July	1.35731	537.116	28.8988	37.7422	108.393	2.43877	1.8762	173.543	12.642	21.7951	11.8382	26.3468	428.954	45.232	156.19
5MKHN_S_2	Male	Khovd	Rural	Summer	2	28	Sunday	July	1.08585	406.778	35.1908	49.9757	794.23	3.74335	2.7914	880.011	10.2027	80.9167	11.5794	24.2493	402.364	38.072	531.729
5MKHN_S_3	Male	Khovd	Rural	Summer	3	28	Monday	July	1.08585	228.162	33.0712	63.666	847.185	3.76677	2.57756	886.299	21.4123	74.4001	12.9506	50.9831	296.048	0	263.603
5MKHN_W_1	Male	Khovd	Rural	Winter	1	28	Tuesday	January	1.29587	554.537	30.2907	30.0741	521.04	3.20088	2.10972	528.161	6.37705	53.5241	15.7243	25.1538	629.574	52.8	374.094
5MKHN_W_2	Male	Khovd	Rural	Winter	2	28	Wedesday	January	1.29587	406.026	22.3323	16.5861	1081.37	2.07211	1.46866	1164.7	5.65208	100.925	13.9418	14.9823	417.995	39.491	312.922
5MKHN_W_3	Male	Khovd	Rural	Winter	3	28	Thursday	January	1.29587	566.551	32.2977	27.038	133.523	2.40616	1.89748	192.332	8.43754	20.9549	19.5839	23.3817	739.229	69.22	270.388
6MKHN_S_1	Male	Khovd	Rural	Summer	1	36	Saturday	July	0.710438	372.187	34.1575	46.8273	120.899	5.21356	3.12849	162.974	17.9303	60.6676	9.46243	42.5272	671.227	27.124	244.399
6MKHN_S_2	Male	Khovd	Rural	Summer	2	36	Sunday	July	0.56835	85.4812	9.23224	14.5013	322.837	1.4938	0.588825	439.081	8.22762	29.9744	2.92329	17.8593	82.5138	17.388	278.326
6MKHN_S_3	Male	Khovd	Rural	Summer	3	36	Monday	July	0.56835	130.891	19.5924	20.6826	654.169	2.88358	1.7768	730.14	7.65219	55.3931	8.73163	19.76	387.64	11.172	248.357
6MKHN_W_1	Male	Khovd	Rural	Winter	1	36	Tuesday	January	0.659437	150.595	22.8448	19.1717	1035.27	3.3033	1.00208	1717.35	11.6595	105.029	9.96977	28.4749	412.939	100.61	637.496
6MKHN_W_2	Male	Khovd	Rural	Winter	2	36	Wedesday	January	0.659437	403.645	38.4327	54.8544	148.617	3.25183	1.63132	211.979	24.8727	42.5636	11.2699	59.445	523.596	28.072	255.446
6MKHN_W_3	Male	Khovd	Rural	Winter	3	36	Thursday	January	0.659437	167.871	20.6994	28.0993	553.431	2.34602	0.675716	576.141	13.4793	69.5919	5.80777	32.0818	398.937	4.664	343.778
7MKHN_S_1	Male	Khovd	Rural	Summer	1	27	Saturday	July	1.35731	202.782	23.7232	35.4443	331.542	2.12311	1.16434	579.27	13.7826	42.7448	13.5939	33.5302	496.251	50.572	201.63
7MKHN_S_2	Male	Khovd	Rural	Summer	2	27	Sunday	July	1.08585	217.638	17.0026	30.429	211.138	2.44842	0.848295	313.772	10.0017	37.2496	9.37268	25.4209	335.915	20.664	394.266
7MKHN_S_3	Male	Khovd	Rural	Summer	3	27	Monday	July	1.08585	294.129	45.0924	71.3861	8486.46	8.31309	2.38814	8529.8	125.788	70.5555	6.17805	47.8656	216.423	0	213.241
7MKHN_W_1	Male	Khovd	Rural	Winter	1	27	Tuesday	January	1.29587	270.311	15.772	13.6103	305.598	1.3465	0.926035	353.171	6.95163	30.4083	8.2634	14.486	327.249	26.376	121.365
7MKHN_W_2	Male	Khovd	Rural	Winter	2	27	Wedesday	January	1.29587	245.67	25.5668	21.4582	204.349	1.71955	0.999656	351.14	10.8674	15.0237	17.023	28.2195	581.317	37.26	93.0739
7MKHN_W_3	Male	Khovd	Rural	Winter	3	27	Thursday	January	1.29587	345.198	33.3444	34.4462	61.2134	2.39158	1.23541	83.753	16.6057	13.9833	12.0818	42.7274	647.776	27.928	85.9045
8MKHN_S_1	Male	Khovd	Rural	Summer	1	47	Saturday	July	0.535823	322.3	12.3979	12.6176	138.928	1.65882	1.09044	173.983	2.32107	17.2371	7.25149	7.19892	231.47	36.728	303.162
8MKHN_S_2	Male	Khovd	Rural	Summer	2	47	Sunday	July	0.428658	195.244	11.6331	16.652	218.726	2.42346	1.09674	342.451	4.59934	20.1298	5.03749	17.1569	155.533	32.08	343.106
8MKHN_S_3	Male	Khovd	Rural	Summer	3	47	Monday	July	0.428658	72.9216	8.94449	11.506	191.027	1.7717	0.500385	242.348	5.37733	29.7542	5.88744	13.3565	221.894	12.952	448.726
8MKHN_W_1	Male	Khovd	Rural	Winter	1	47	Tuesday	January	0.559527	290.232	10.9742	9.12859	9.9019	0.836706	0.751485	40.2566	1.16001	0.320564	5.61659	6.0473	226.177	22.44	0
8MKHN_W_2	Male	Khovd	Rural	Winter	2	47	Wedesday	January	0.559527	417.453	28.3175	29.1878	14.8154	1.84822	1.35302	70.6147	9.16011	7.76481	10.4971	28.028	602.904	31.416	0
8MKHN_W_3	Male	Khovd	Rural	Winter	3	47	Thursday	January	0.559527	289.352	10.7121	8.94453	9.53222	0.899357	0.771592	40.5652	1.16624	0.327727	5.3698	6.08206	218.427	21.208	0
9MKHN_S_1	Male	Khovd	Rural	Summer	1	46	Saturday	July	0.535823	209.492	18.3565	26.0353	146.529	2.16904	0.898357	226.004	11.1303	20.7179	9.63622	29.5342	396.731	21.9	181.411
9MKHN_S_2	Male	Khovd	Rural	Summer	2	46	Sunday	July	0.428658	303.588	20.5644	20.1318	551.309	2.4553	1.27257	721.367	9.19033	130.65	11.1326	23.2711	289.215	46.342	193.445
9MKHN_S_3	Male	Khovd	Rural	Summer	3	46	Monday	July	0.428658	171.251	10.2881	12.0237	42.5861	0.888743	0.48961	42.8202	4.28151	11.2994	3.70442	10.9742	222.855	12.76	90.3854
9MKHN_W_1	Male	Khovd	Rural	Winter	1	46	Tuesday	January	0.559527	286.494	17.8579	12.3336	99.2422	1.20353	0.983528	149.79	4.11657	8.18438	11.7751	11.6566	385.515	38.336	111.894
9MKHN_W_2	Male	Khovd	Rural	Winter	2	46	Wedesday	January	0.559527	423.613	25.4534	18.9059	214.299	1.81378	1.24058	224.384	7.42485	18.3312	11.2146	21.3176	504.41	32.032	97.5548
9MKHN_W_3	Male	Khovd	Rural	Winter	3	46	Thursday	January	0.559527	171.822	26.4383	25.171	118.735	2.23635	0.953149	221.192	15.028	15.8038	12.2799	36.6783	379.909	21.376	262.963
10FWN_S_1	Female	Khuvsgul	Rural	Summer	1	32	Monday	July	0.88195	59.2506	6.74216	12.246	375.52	1.71404	0.512927	495.711	6.0778	44.7013	2.07915	13.9074	206.905	19.2	536.404
10FWN_S_2	Female	Khuvsgul	Rural	Summer	2	32	Tuesday	July	1.10244	114.265	13.0744	27.2289	271.019	2.27364	0.921942	299.839	10.7173	33.9945	1.63524	26.4854	157.158	4.992	184.868
10FWN_S_3	Female	Khuvsgul	Rural	Summer	3	32	Wedesday	July	1.10244	155.666	25.1181	31.0717	160.009	1.77591	0.942431	254.951	10.5931	32.0022	4.79734	28.136	495.383	118.8	95.3784
10FWN_W_1	Female	Khuvsgul	Rural	Winter	1	32	Wedesday	February	1.1982	60.7925	8.14726	7.07611	44.3154	0.682232	0.32293	66.6372	4.02693	6.29411	2.45416	7.85038	130.862	4.488	101.139
10FWN_W_2	Female	Khuvsgul	Rural	Winter	2	32	Thursday	February	1.1982	72.9175	12.925	17.7247	139.358	1.09663	0.599498	168.038	6.65942	20.2086	2.6703	17.1016	265.45	0	79.2473
10FWN_W_3	Female	Khuvsgul	Rural	Winter	3	32	Friday	February	1.1982	36.3337	6.92481	6.53049	190.284	0.766978	0.476964	230.768	2.33691	16.1745	4.5824	6.59902	160.941	7.084	103.572
1FWN_S_1	Female	Khuvsgul	Rural	Summer	1	30	Monday	July	0.88195	138.881	16.5689	24.2872	110	1.64312	0.887394	120.066	8.66532	25.0116	3.41921	21.5953	321.466	5.632	184.099
1FWN_S_2	Female	Khuvsgul	Rural	Summer	2	30	Tuesday	July	1.10244	81.1139	9.8977	15.5598	161.829	1.49217	0.731977	201.548	5.01544	16.6767	3.17093	13.9588	159.418	4.508	93.458
1FWN_S_3	Female	Khuvsgul	Rural	Summer	3	30	Wedesday	July	1.10244	102.381	9.84949	11.7742	252.97	1.75569	1.15392	272.272	1.51602	19.2142	2.39623	7.35328	261.794	3.52	141.839
1FWN_W_1	Female	Khuvsgul	Rural	Winter	1	30	Wedesday	February	1.1982	105.62	13.7076	14.9723	139.689	1.17728	0.792724	176.588	5.00731	18.6713	6.11879	13.3108	316.135	12.652	114.07
1FWN_W_2	Female	Khuvsgul	Rural	Winter	2	30	Thursday	February	1.1982	105.168	15.2974	13.3497	27.9309	1.12553	0.968362	87.8377	3.81272	3.79192	5.83059	11.132	290.432	11.812	57.099
1FWN_W_3	Female	Khuvsgul	Rural	Winter	3	30	Friday	February	1.1982	110.872	11.7074	10.83	71.982	1.10317	0.6859	135.365	4.44476	9.27134	3.87346	11.675	214.82	7.656	152.085
2FWN_S_1	Female	Khuvsgul	Rural	Summer	1	52	Monday	July	0.496094	141.158	22.6703	33.3107	3825.02	3.9654	1.53833	3830.63	43.8903	37.4212	3.5578	17.2188	152.466	0	217.898
2FWN_S_2	Female	Khuvsgul	Rural	Summer	2	52	Tuesday	July	0.620118	66.1348	8.5181	9.34538	399.099	1.39921	0.92144	409.444	2.30862	38.6534	2.02569	6.47805	147.052	0	211.195
2FWN_S_3	Female	Khuvsgul	Rural	Summer	3	52	Wedesday	July	0.620118	155.039	18.2508	32.2868	3369.13	3.80621	1.50213	3431.24	36.3186	41.5497	3.39242	16.6203	130.648	10.448	302.906
2FWN_W_1	Female	Khuvsgul	Rural	Winter	1	52	Wedesday	February	0.579176	102.775	8.60655	10.7483	0	0.659839	0.450918	15.416	2.78391	4.52797	2.74241	7.83492	178.827	3.416	0
2FWN_W_2	Female	Khuvsgul	Rural	Winter	2	52	Thursday	February	0.579176	145.281	11.2618	14.7274	40.7355	1.26223	0.994574	55.9092	2.41446	7.86225	2.58837	9.53446	148.07	0	0
2FWN_W_3	Female	Khuvsgul	Rural	Winter	3	52	Friday	February	0.579176	134.889	14.0539	13.6446	31.71	1.14902	1.03606	58.6356	2.99004	2.61063	2.03611	9.66713	283.717	39.15	0
3FWN_S_1	Female	Khuvsgul	Rural	Summer	1	50	Monday	July	0.496094	70.5009	10.8304	10.4157	404.397	2.42719	0.927517	454.388	4.7378	38.1825	6.37065	12.6157	242.784	10.136	484.081
3FWN_S_2	Female	Khuvsgul	Rural	Summer	2	50	Tuesday	July	0.620118	103.807	14.6543	16.0697	565.375	3.2152	1.69929	607.83	4.57366	54.247	3.20917	12.6847	256.995	0	592.967
3FWN_S_3	Female	Khuvsgul	Rural	Summer	3	50	Wedesday	July	0.620118	67.8085	7.33462	9.30922	501.091	2.86925	1.03015	556.01	4.35084	48.3966	2.02067	10.9779	83.4593	7.68	647.195
3FWN_W_1	Female	Khuvsgul	Rural	Winter	1	50	Wedesday	February	0.579176	122.964	13.5318	13.2672	344.67	2.07346	0.842669	375.486	6.46543	38.7017	6.56786	15.7673	286.304	12.912	451.287
3FWN_W_2	Female	Khuvsgul	Rural	Winter	2	50	Thursday	February	0.579176	277.862	15.9631	13.5503	611.761	2.22124	1.51836	660.271	3.47888	52.8055	9.09894	10.1286	298.702	25.08	411.727
3FWN_W_3	Female	Khuvsgul	Rural	Winter	3	50	Friday	February	0.579176	577.052	28.6451	33.5147	2852.7	3.60046	2.02313	2868.92	28.1246	39.5669	10.3926	17.5175	383.814	36.432	91.4096
4FWN_S_1	Female	Khuvsgul	Rural	Summer	1	36	Monday	July	0.51753	57.7445	27.601	21.2688	135.679	2.05052	0.504545	215.451	24.0695	17.3459	3.05595	13.1527	79.3658	0	261.554
4FWN_S_2	Female	Khuvsgul	Rural	Summer	2	36	Tuesday	July	0.646912	132.286	15.4832	17.0391	219.01	1.99932	0.808487	253.926	10.5627	31.5446	4.50711	13.6821	163.951	11.152	428.2
4FWN_S_3	Female	Khuvsgul	Rural	Summer	3	36	Wedesday	July	0.646912	61.2387	9.53205	16.9284	61.2202	1.38079	0.908025	107.758	4.32234	13.7544	2.08188	15.3511	91.1805	1.232	140.443
4FWN_W_1	Female	Khuvsgul	Rural	Winter	1	36	Wedesday	February	0.579026	107.895	13.0106	31.2412	167.811	2.80548	1.99672	234.309	5.70082	17.4248	6.82451	11.8871	258.572	12.068	109.021
4FWN_W_2	Female	Khuvsgul	Rural	Winter	2	36	Thursday	February	0.579026	127.971	15.2946	11.629	166.008	0.872168	0.408715	215.358	6.38352	16.1531	9.82268	11.3522	294.169	10.88	20.3113
4FWN_W_3	Female	Khuvsgul	Rural	Winter	3	36	Friday	February	0.579026	80.1347	9.04082	8.67292	20.0819	0.635979	0.300893	324.873	3.86504	4.92503	9.8978	10.5638	191.548	8.888	36.9991
5FWN_S_1	Female	Khuvsgul	Rural	Summer	1	42	Monday	July	0.51753	93.6669	12.4679	14.5665	481.779	2.46212	1.40693	531.016	3.71572	38.7065	2.858	10.906	219.615	0	231.597
5FWN_S_2	Female	Khuvsgul	Rural	Summer	2	42	Tuesday	July	0.646912	67.3762	7.93255	10.7251	400.672	2.06455	0.839463	477.986	2.85323	30.9667	2.63455	11.2136	238.619	8.4	298.169
5FWN_S_3	Female	Khuvsgul	Rural	Summer	3	42	Wedesday	July	0.646912	73.7812	10.8027	13.2441	428.068	1.57998	1.43786	471.655	1.3804	42.0641	2.06732	5.81669	173.885	5.088	181.411
5FWN_W_1	Female	Khuvsgul	Rural	Winter	1	42	Wedesday	February	0.579026	190.298	23.5002	29.4426	207.282	1.6871	1.08353	276.193	9.33731	32.3605	8.0835	25.085	547.949	76.346	11.7471
5FWN_W_2	Female	Khuvsgul	Rural	Winter	2	42	Thursday	February	0.579026	203.634	16.9832	22.9731	125.566	1.60334	1.26956	171.621	5.76836	22.8998	2.6871	15.7729	325.544	13.05	17.9819
5FWN_W_3	Female	Khuvsgul	Rural	Winter	3	42	Friday	February	0.579026	203.486	17.5065	20.7038	185.834	1.64713	1.39091	238.499	5.15447	27.5968	6.49384	12.5018	418.231	11.396	34.3314
6FWN_S_1	Female	Khuvsgul	Rural	Summer	1	42	Monday	July	0.51753	101.951	8.1246	9.87306	667.648	2.04662	0.759436	702.911	6.00073	63.2822	4.38151	11.2962	116.949	7.04	514.915
6FWN_S_2	Female	Khuvsgul	Rural	Summer	2	42	Tuesday	July	0.646912	77.4327	10.8327	14.3203	365.546	1.66835	0.632519	377.572	9.34604	40.8508	4.47332	21.2496	80.2284	2.992	256.433
6FWN_S_3	Female	Khuvsgul	Rural	Summer	3	42	Wedesday	July	0.646912	63.7713	12.0335	14.6035	198.791	1.38647	0.413371	204.365	6.08913	21.8848	3.43306	17.0607	208.821	2.64	258.61
6FWN_W_1	Female	Khuvsgul	Rural	Winter	1	42	Wedesday	February	0.579026	57.3783	7.79873	7.48136	96.3158	0.72053	0.258354	137.812	4.41685	9.20503	2.3556	11.3972	140.189	0	68.6212
6FWN_W_2	Female	Khuvsgul	Rural	Winter	2	42	Thursday	February	0.579026	140.227	7.58084	6.63615	45.8408	0.59076	0.370469	76.5977	2.88413	4.445	3.05786	8.08762	136.532	7.216	9.19424
6FWN_W_3	Female	Khuvsgul	Rural	Winter	3	42	Friday	February	0.579026	338.3	18.2229	14.0248	9.54	1.07776	0.980762	68.4336	4.59832	0.619007	11.0189	13.651	394.513	35.852	0
7FWN_S_1	Female	Khuvsgul	Rural	Summer	1	40	Monday	July	0.51753	220.21	23.6157	33.8713	4454.71	4.77135	1.6551	4472.01	59.5973	61.405	5.31662	22.8056	112.2	6.688	336.961
7FWN_S_2	Female	Khuvsgul	Rural	Summer	2	40	Tuesday	July	0.646912	124.078	15.7853	34.3929	205.3	2.0935	1.00784	239.475	14.1972	41.553	2.01128	33.7418	81.6264	0	148.253
7FWN_S_3	Female	Khuvsgul	Rural	Summer	3	40	Wedesday	July	0.646912	185.83	23.6109	33.1451	258.505	2.54864	1.12736	262.22	12.9095	48.3805	5.09564	31.6284	504.647	7.392	368.839
7FWN_W_1	Female	Khuvsgul	Rural	Winter	1	40	Wedesday	February	0.579026	218.134	15.1088	13.5077	127.824	1.38853	0.573547	243.395	6.90456	10.6969	6.47813	18.2985	287.649	10.768	72
7FWN_W_2	Female	Khuvsgul	Rural	Winter	2	40	Thursday	February	0.579026	198.935	14.3488	12.6954	37.2252	1.19651	0.53802	140.9	6.37009	4.74642	4.64351	17.0297	252.539	6.248	64.7805
7FWN_W_3	Female	Khuvsgul	Rural	Winter	3	40	Friday	February	0.579026	248.366	16.9532	16.7522	219.361	2.05621	0.831246	225.233	10.2018	22.2217	6.4041	24.1933	209.654	14.784	274.613
8FWN_S_1	Female	Khuvsgul	Rural	Summer	1	40	Monday	July	0.51753	149.584	15.9146	39.3374	38.9054	2.93926	2.1131	141.641	6.809	11.235	6.21313	17.0952	266.161	7.168	34.5667
8FWN_S_2	Female	Khuvsgul	Rural	Summer	2	40	Tuesday	July	0.646912	135.657	20.1806	27.2618	4149.67	3.37929	0.576069	4164.36	58.8046	16.1669	3.29715	17.6178	59.9049	0	16.3872
8FWN_S_3	Female	Khuvsgul	Rural	Summer	3	40	Wedesday	July	0.646912	82.4466	10.7089	27.4545	43.5856	2.08489	1.4876	129.578	3.91634	23.5397	8.89531	12.0538	297.274	17.948	56.7533
8FWN_W_1	Female	Khuvsgul	Rural	Winter	1	40	Wedesday	February	0.579026	109.815	10.7671	9.23254	227.19	0.98092	0.772194	294.928	2.2036	0.257615	4.94755	10.017	274.362	37.076	0
8FWN_W_2	Female	Khuvsgul	Rural	Winter	2	40	Thursday	February	0.579026	67.7146	9.47293	9.37121	25.1579	0.820429	0.548811	75.4134	3.68475	4.96257	3.62783	9.88595	184.036	4.9	51.2099
8FWN_W_3	Female	Khuvsgul	Rural	Winter	3	40	Friday	February	0.579026	84.3986	8.77336	9.31013	1.36762	0.610664	0.231188	41.7109	4.59853	2.78075	4.52487	12.3605	208.807	7.812	4.15641
9FWN_S_1	Female	Khuvsgul	Rural	Summer	1	43	Monday	July	0.51753	65.0361	9.92473	15.7175	42.3433	0.867633	0.311864	111.398	6.5162	14.5527	4.54363	15.9901	197.148	7.984	94.6102
9FWN_S_2	Female	Khuvsgul	Rural	Summer	2	43	Tuesday	July	0.646912	120.518	7.98845	12.0936	421.226	2.40886	0.895126	454.295	4.84581	23.3663	2.2171	13.3134	154.148	0.88	71.2653
9FWN_S_3	Female	Khuvsgul	Rural	Summer	3	43	Wedesday	July	0.646912	35.8157	7.14868	9.17474	60.3095	0.692409	0.166339	65.1528	4.2465	14.3991	1.1031	10.1345	161.059	42	111.515
9FWN_W_1	Female	Khuvsgul	Rural	Winter	1	43	Wedesday	February	0.579026	47.3482	17.7156	16.9314	107.761	1.48286	0.513022	174.669	10.3531	17.7701	2.7761	15.4594	237.025	6.912	250.928
9FWN_W_2	Female	Khuvsgul	Rural	Winter	2	43	Thursday	February	0.579026	34.2062	7.2125	8.39282	588.689	0.859741	0.373567	697.523	4.26661	54.1264	3.22888	10.643	49.2315	12.288	150.813
9FWN_W_3	Female	Khuvsgul	Rural	Winter	3	43	Friday	February	0.579026	71.2079	16.2102	17.934	310.893	1.52872	0.651247	322.595	8.84436	33.3404	4.34156	22.4492	337.001	0	173.857
10MWN_S_1	Male	Khuvsgul	Rural	Summer	1	46	Monday	July	0.428658	99.717	13.6811	18.7606	338.997	1.99258	1.11707	342.842	6.71981	30.4552	2.30615	15.2049	277.999	0	168.993
10MWN_S_2	Male	Khuvsgul	Rural	Summer	2	46	Tuesday	July	0.535823	79.9633	13.8213	15.8969	173.931	1.49354	0.975856	228.447	4.38628	24.6577	7.36044	11.7324	299.803	11.508	201.127
10MWN_S_3	Male	Khuvsgul	Rural	Summer	3	46	Wedesday	July	0.535823	149.605	24.4817	33.2907	280.324	3.88269	2.65911	363.154	9.84376	41.5825	3.4102	26.482	449.623	92.07	120.087
10MWN_W_1	Male	Khuvsgul	Rural	Winter	1	46	Wedesday	February	0.559527	76.4643	9.58652	12.894	730.902	1.92418	1.01713	924.354	6.22354	63.3439	5.52011	16.8064	47.9172	21.48	377.161
10MWN_W_2	Male	Khuvsgul	Rural	Winter	2	46	Thursday	February	0.559527	72.3611	24.2646	17.9675	602.482	1.70073	0.810038	756.692	10.4249	48.8948	16.1953	13.3474	461.181	27.72	235.565
10MWN_W_3	Male	Khuvsgul	Rural	Winter	3	46	Friday	February	0.559527	75.7812	22.9546	17.8168	391.955	1.89895	0.612031	423.573	11.057	34.9526	6.2647	28.9135	480.312	130.5	241.198
1MWN_S_1	Male	Khuvsgul	Rural	Summer	1	58	Monday	July	0.428658	370.86	36.1069	58.4601	7980.54	6.76222	1.70034	7990.75	93.8206	37.2562	5.76727	32.5493	96.215	0	32.1342
1MWN_S_2	Male	Khuvsgul	Rural	Summer	2	58	Tuesday	July	0.535823	163.893	14.6753	20.9448	241.649	1.42591	0.821343	279.634	6.83525	30.9817	2.76825	18.2894	279.745	38.7	67.725
1MWN_S_3	Male	Khuvsgul	Rural	Summer	3	58	Wedesday	July	0.535823	157.959	24.0117	29.9279	652.648	2.4014	2.45672	738.721	4.96018	67.328	4.55773	15.5665	442.144	0	124.568
1MWN_W_1	Male	Khuvsgul	Rural	Winter	1	58	Wedesday	February	0.559527	234.973	16.3986	22.5688	771.931	1.8095	1.10094	865.595	8.2069	68.4015	8.97907	21.4314	231.268	16.544	206.504
1MWN_W_2	Male	Khuvsgul	Rural	Winter	2	58	Thursday	February	0.559527	150.108	19.5705	21.6302	182.193	1.94003	1.38529	273.797	5.63555	23.6758	8.99721	17.0445	433.967	18.664	211.113
1MWN_W_3	Male	Khuvsgul	Rural	Winter	3	58	Friday	February	0.559527	154.308	15.3002	20.7442	281.797	1.97091	0.846862	314.15	7.42239	36.7169	7.00976	21.8892	295.999	14.144	266.931
2MWN_S_1	Male	Khuvsgul	Rural	Summer	1	56	Monday	July	0.428658	82.9973	10.8413	16.1148	435.176	3.19236	1.10389	512.673	5.67778	37.1034	3.32931	19.0921	142.254	8.112	521.716
2MWN_S_2	Male	Khuvsgul	Rural	Summer	2	56	Tuesday	July	0.535823	103.797	13.6664	15.8303	367.313	2.43725	1.31169	372.648	3.8562	43.073	3.61906	12.4271	281.984	5.28	538.159
2MWN_S_3	Male	Khuvsgul	Rural	Summer	3	56	Wedesday	July	0.535823	92.9292	14.0941	18.326	1127.75	2.63542	1.40664	1248.15	4.54795	92.9462	7.39393	17.7384	362.283	9.168	517.03
2MWN_W_1	Male	Khuvsgul	Rural	Winter	1	56	Wedesday	February	0.559527	129.502	9.75139	12.4592	613.255	1.82948	1.02653	656.209	2.85896	45.708	3.96993	8.94014	170.761	3.52	228.904
2MWN_W_2	Male	Khuvsgul	Rural	Winter	2	56	Thursday	February	0.559527	77.906	14.1351	12.0558	792.387	1.77433	0.97753	826.843	5.72649	67.314	5.27967	9.04737	234	1.848	322.939
2MWN_W_3	Male	Khuvsgul	Rural	Winter	3	56	Friday	February	0.559527	62.5647	8.50562	11.3745	363.445	1.3841	0.794037	480.578	5.07583	40.895	2.59046	12.049	87.7011	16.704	228.761
3MWN_S_1	Male	Khuvsgul	Rural	Summer	1	42	Monday	July	0.56835	254.268	17.0791	20.2454	364.179	2.19786	1.69051	390.313	4.40301	40.5871	6.57043	13.3985	269.736	21.208	305.211
3MWN_S_2	Male	Khuvsgul	Rural	Summer	2	42	Tuesday	July	0.710438	191.901	16.0972	15.7461	270.37	1.98022	1.28835	329.886	3.14489	30.0295	10.1877	11.91	387.073	28.04	309.692
3MWN_S_3	Male	Khuvsgul	Rural	Summer	3	42	Wedesday	July	0.710438	129.761	19.0531	23.4447	611.459	2.61074	2.25323	666.29	2.48467	60.5112	3.76663	10.5355	353.236	0	284.983
3MWN_W_1	Male	Khuvsgul	Rural	Winter	1	42	Wedesday	February	0.659437	172.475	15.24	15.6559	73.5054	1.60389	0.937102	132.179	6.65946	10.4108	4.36946	17.5019	254.857	6.072	168.865
3MWN_W_2	Male	Khuvsgul	Rural	Winter	2	42	Thursday	February	0.659437	162.589	35.4448	40.3374	228.774	3.07827	1.16293	232.909	20.2444	43.8234	7.41994	50.6968	752.877	0	314.429
3MWN_W_3	Male	Khuvsgul	Rural	Winter	3	42	Friday	February	0.659437	196.301	24.5382	23.5813	105.515	2.15531	1.22389	201.269	11.8903	13.6623	6.74426	28.4996	440.071	12.76	219.946
4MWN_S_1	Male	Khuvsgul	Rural	Summer	1	30	Monday	July	1.08585	136.984	18.1595	29.0923	268.161	1.81401	1.20221	478.38	9.35787	39.9319	5.52636	24.532	484.117	37.108	172.577
4MWN_S_2	Male	Khuvsgul	Rural	Summer	2	30	Tuesday	July	1.35731	132.138	15.2084	18.2095	556.082	2.35106	1.73367	594.829	3.83173	65.0603	3.13836	10.0344	273.874	1.3	120.727
4MWN_S_3	Male	Khuvsgul	Rural	Summer	3	30	Wedesday	July	1.35731	143.426	18.5729	30.2317	427.048	1.78643	1.72736	564.707	7.32757	49.6574	3.24467	20.2564	271.092	15.6	52.8742
4MWN_W_1	Male	Khuvsgul	Rural	Winter	1	30	Wedesday	February	1.29587	166.128	24.7153	21.1881	896.001	1.53521	1.40006	968.79	5.9997	82.4259	9.8813	8.54125	439.856	12.376	10.2486
4MWN_W_2	Male	Khuvsgul	Rural	Winter	2	30	Thursday	February	1.29587	151.084	38.6076	31.6334	101.976	1.85251	1.37763	135.988	14.9276	11.9757	7.68405	16.6393	621.41	7	0
4MWN_W_3	Male	Khuvsgul	Rural	Winter	3	30	Friday	February	1.29587	161.986	27.4717	26.087	442.267	1.76621	1.71578	486.674	8.24356	40.8173	4.49241	10.5923	420.325	0	0
5MWN_S_1	Male	Khuvsgul	Rural	Summer	1	32	Monday	July	1.08585	83.0024	16.6376	17.5282	325.219	1.82739	1.3351	423.643	5.32568	34.4864	2.43608	9.89172	492.048	15.672	258.651
5MWN_S_2	Male	Khuvsgul	Rural	Summer	2	32	Tuesday	July	1.35731	110.985	17.1115	22.2768	360.537	1.88194	1.71524	396.171	5.33578	41.6982	2.21549	11.5148	248.916	5.184	183.401
5MWN_S_3	Male	Khuvsgul	Rural	Summer	3	32	Wedesday	July	1.35731	230.198	35.3099	65.3333	8488.78	6.73588	1.50217	8490.51	105.009	79.0858	5.62679	34.478	37.397	0	130.969
5MWN_W_1	Male	Khuvsgul	Rural	Winter	1	32	Wedesday	February	1.29587	107.539	28.1926	25.2464	33.6206	1.70309	1.22852	95.1839	11.2956	6.05621	4.21594	18.4041	460.822	0	68.7492
5MWN_W_2	Male	Khuvsgul	Rural	Winter	2	32	Thursday	February	1.29587	157.782	37.2682	33.4222	62.33	2.04694	0.936958	181.338	24.9267	28.775	11.5078	35.9264	400.467	14	0
5MWN_W_3	Male	Khuvsgul	Rural	Winter	3	32	Friday	February	1.29587	301.888	61.4316	80.2277	20.1471	5.34594	4.04361	32.7609	37.3389	2.77576	10.5331	89.9058	457.513	0	47.6252
6MWN_S_1	Male	Khuvsgul	Rural	Summer	1	37	Monday	July	0.56835	121.726	19.2524	25.0457	190.896	2.04351	0.978095	321.1	11.2691	27.156	5.02248	27.5689	262.453	0.5	231.341
6MWN_S_2	Male	Khuvsgul	Rural	Summer	2	37	Tuesday	July	0.710438	252.446	23.0746	40.7625	6249.2	4.61722	1.05204	6262.32	57.0692	66.3101	2.62815	21.6738	152.651	0	241.326
6MWN_S_3	Male	Khuvsgul	Rural	Summer	3	37	Wedesday	July	0.710438	69.3621	14.3926	19.5109	222.744	1.84703	0.576255	314.916	10.6571	30.5879	3.96477	25.5585	187.336	0	329.023
6MWN_W_1	Male	Khuvsgul	Rural	Winter	1	37	Wedesday	February	0.659437	239.045	31.8717	28.0142	246.056	2.35186	0.999757	359.205	15.2495	23.6798	16.2917	40.9248	757.426	22.652	110.418
6MWN_W_2	Male	Khuvsgul	Rural	Winter	2	37	Thursday	February	0.659437	110.826	7.70296	9.2378	782.886	2.1315	0.73136	1885.62	2.33034	59.8948	7.35724	10.3784	227.287	0	209.269
6MWN_W_3	Male	Khuvsgul	Rural	Winter	3	37	Friday	February	0.659437	210.016	18.4966	22.8875	274.39	1.81235	0.807459	397.881	11.2065	32.0147	10.2765	28.2247	322.235	16.212	132.121
7MWN_S_1	Male	Khuvsgul	Rural	Summer	1	46	Monday	July	0.428658	75.5574	10.0761	10.4613	13.3891	0.689127	0.236319	65.0371	5.06307	5.07883	3.3821	13.246	214.934	28.156	25.861
7MWN_S_2	Male	Khuvsgul	Rural	Summer	2	46	Tuesday	July	0.535823	171.724	26.069	30.0285	1475.64	2.57142	2.45694	1534.89	10.819	74.0059	8.90374	13.1979	500.755	9.072	49.0334
7MWN_S_3	Male	Khuvsgul	Rural	Summer	3	46	Wedesday	July	0.535823	94.7776	12.1561	14.9225	105.998	1.1128	0.519633	299.917	6.9888	18.9303	7.16975	17.5765	198.677	20.822	115.493
7MWN_W_1	Male	Khuvsgul	Rural	Winter	1	46	Wedesday	February	0.559527	149.031	20.8776	22.5732	2.99833	1.47217	0.891535	43.8754	9.36663	5.71646	3.99036	25.0297	422.252	0	0
7MWN_W_2	Male	Khuvsgul	Rural	Winter	2	46	Thursday	February	0.559527	222.429	26.0539	39.5973	75.62	2.15763	1.47903	76.2091	18.2398	186.483	10.4437	30.8282	480.506	20.75	80.6555
7MWN_W_3	Male	Khuvsgul	Rural	Winter	3	46	Friday	February	0.559527	170.669	17.8719	26.6019	47.9	1.13635	0.650178	146.9	16.1073	201.782	19.0098	22.9321	380.712	46.042	0
8MWN_S_1	Male	Khuvsgul	Rural	Summer	1	39	Monday	July	0.56835	126.967	18.0926	23.2245	443.955	1.66774	1.15242	602.683	5.02029	19.7354	11.7116	22.5894	520.236	55.7	47.8812
8MWN_S_2	Male	Khuvsgul	Rural	Summer	2	39	Tuesday	July	0.710438	122.478	16.0751	25.5293	2502.58	2.69071	0.746226	2670.09	31.634	12.5903	2.45093	18.1665	312.843	17.52	103.956
8MWN_S_3	Male	Khuvsgul	Rural	Summer	3	39	Wedesday	July	0.710438	149.096	12.5637	18.3313	172.978	1.1539	0.778037	352.722	6.06146	21.3847	4.88606	16.0501	146.211	4.224	89.8733
8MWN_W_1	Male	Khuvsgul	Rural	Winter	1	39	Wedesday	February	0.659437	108.731	12.2477	9.95516	146.037	1.61272	0.723298	199.639	5.72165	38.5083	8.06462	11.6775	275.147	20.052	297.913
8MWN_W_2	Male	Khuvsgul	Rural	Winter	2	39	Thursday	February	0.659437	127.33	21.2299	21.4595	382.913	1.96708	0.853706	532.057	9.53505	33.328	10.4536	21.3617	379.607	24.608	191.269
8MWN_W_3	Male	Khuvsgul	Rural	Winter	3	39	Friday	February	0.659437	255.454	15.1488	12.7928	94.4697	1.3616	0.970299	172.941	4.79618	11.6315	7.22503	12.8582	271.991	30.184	195.494
9MWN_S_1	Male	Khuvsgul	Rural	Summer	1	52	Monday	July	0.428658	181.472	24.9392	47.6893	2714.82	4.56262	1.26111	2720.15	55.1235	50.9572	3.09991	41.9463	76.3677	0	296.735
9MWN_S_2	Male	Khuvsgul	Rural	Summer	2	52	Tuesday	July	0.535823	48.9207	9.43667	11.0052	238.077	1.11821	0.753792	312.05	4.04103	23.2297	6.99803	12.174	240.341	12.18	177.361
9MWN_S_3	Male	Khuvsgul	Rural	Summer	3	52	Wedesday	July	0.535823	209.65	14.6146	30.4365	58.1604	1.71789	0.397468	67.6093	7.98597	19.2326	2.01631	19.9663	316.104	86.1	184.21
9MWN_W_1	Male	Khuvsgul	Rural	Winter	1	53	Wedesday	February	0.559527	106.538	56.7005	42.7061	501.163	3.54496	1.33238	615.366	29.8116	42.9354	17.4715	30.6761	928.272	25.284	720.121
9MWN_W_2	Male	Khuvsgul	Rural	Winter	2	53	Thursday	February	0.559527	140.611	9.34152	12.1794	565.522	2.42071	0.750515	590.675	8.50031	51.718	4.49771	14.3818	152.21	11.44	921.852
9MWN_W_3	Male	Khuvsgul	Rural	Winter	3	53	Friday	February	0.559527	64.4788	24.4126	23.4547	283.332	2.83433	0.769517	307.827	15.3833	41.9611	3.80853	21.8589	339.855	0	878.451
10FUMH_S_1	Female	Omnogobi	Rural	Summer	1	37	Friday	July	0.646912	33.7019	4.97502	6.5145	34.9658	0.563113	0.222973	67.0497	2.16973	5.69578	0.994229	6.6807	180.696	4.416	60.4276
10FUMH_S_2	Female	Omnogobi	Rural	Summer	2	37	Saturday	July	0.646912	25.6868	3.71311	5.24844	218.079	0.982007	0.321853	274.921	2.27259	18.2074	1.19733	6.50016	85.5757	9.096	198.591
10FUMH_S_3	Female	Omnogobi	Rural	Summer	3	37	Sunday	August	0.51753	41.3813	4.55847	6.04568	137.233	0.775611	0.418165	194.987	3.10114	9.87113	1.03427	7.13762	18.1654	7.776	94.5151
10FUMH_W_1	Female	Omnogobi	Rural	Winter	1	37	Tuesday	January	0.579026	20.468	17.5325	18.0496	6.46171	0.917579	0.55899	6.46171	7.80684	0.862424	1.2981	10.3652	0.246	0	15.3477
10FUMH_W_2	Female	Omnogobi	Rural	Winter	2	37	Wedesday	January	0.579026	60.7107	5.31749	5.95476	1.8	0.395545	0.300884	7.90407	1.09815	0.233286	1.77825	5.41893	106.794	23.73	0
10FUMH_W_3	Female	Omnogobi	Rural	Winter	3	37	Thursday	January	0.579026	97.3788	16.2893	13.4238	65.7575	0.80201	0.583951	147.824	5.63492	5.20952	3.30907	9.74071	341.228	13.736	0
1FUMH_S_1	Female	Omnogobi	Rural	Summer	1	32	Friday	August	1.10244	56.7502	5.08658	5.72084	245.918	1.20318	0.424084	272.707	2.47338	20.5116	3.73637	7.33598	96.0357	7.26	90.8135
1FUMH_S_2	Female	Omnogobi	Rural	Summer	2	32	Saturday	August	1.10244	86.6294	13.7067	14.7509	716.358	1.51044	1.33473	729.057	5.40503	48.9787	3.907	10.4496	222.74	0	98.9283
1FUMH_S_3	Female	Omnogobi	Rural	Summer	3	32	Sunday	August	0.88195	113.469	9.23129	13.0321	22.9726	0.651745	0.395275	72.4427	4.80674	10.5752	5.43529	12.0958	187.224	14.14	6.68968
1FUMH_W_1	Female	Omnogobi	Rural	Winter	1	32	Tuesday	March	1.1982	236.842	20.9895	31.9038	520.038	1.94879	1.02237	578.219	11.6782	60.1804	11.1677	30.4962	309.318	28.132	167.693
1FUMH_W_2	Female	Omnogobi	Rural	Winter	2	32	Wedesday	March	1.1982	187.736	26.8373	50.0102	271.155	3.83793	1.16537	308.722	9.57577	27.6304	11.4258	49.2501	219.465	17.28	89.5527
1FUMH_W_3	Female	Omnogobi	Rural	Winter	3	32	Thursday	March	1.1982	201.874	11.031	10.5139	291.703	1.22261	0.775044	313.753	3.01261	29.3033	5.8712	8.79648	186.758	20.328	200.048
2FUMH_S_1	Female	Omnogobi	Rural	Summer	1	32	Sunday	August	0.88195	40.7466	3.58004	6.23214	306.359	0.877488	0.396013	378.446	3.07189	24.146	1.77707	7.03199	16.2879	12.928	163.103
2FUMH_S_2	Female	Omnogobi	Rural	Summer	2	32	Monday	August	0.88195	296.766	21.1644	27.8914	397.227	2.91427	1.83493	469.956	9.45822	24.8425	7.83246	23.8723	325.638	23.496	187.812
2FUMH_S_3	Female	Omnogobi	Rural	Summer	3	32	Tuesday	September	1.10244	397.64	19.7087	19.7288	176.114	2.44036	1.5475	176.286	3.86559	12.0845	10.0361	16.7204	385.651	39.688	203.451
2FUMH_W_1	Female	Omnogobi	Rural	Winter	1	32	Monday	March	0.958557	42.8115	6.51575	10.5046	407.089	0.960618	0.610702	465.636	3.97972	25.9495	2.41069	9.30437	75.9562	0	93.458
2FUMH_W_2	Female	Omnogobi	Rural	Winter	2	32	Tuesday	March	1.1982	26.2591	7.26697	9.20139	40.4359	0.991951	0.321057	82.1112	2.25622	5.74974	4.35332	9.71016	164.245	8.4	96.4325
2FUMH_W_3	Female	Omnogobi	Rural	Winter	3	32	Wedesday	March	1.1982	238.781	29.4147	38.8542	4578.99	5.31787	1.23751	4584.82	79.0598	12.9453	6.25949	27.3871	141.15	13.2	87.5323
3FUMH_S_1	Female	Omnogobi	Rural	Summer	1	42	Saturday	August	0.646912	94.78	6.52143	7.96203	318.264	1.41266	0.832855	415.633	2.71078	37.7768	6.58822	8.94739	148.419	8.96	110.681
3FUMH_S_2	Female	Omnogobi	Rural	Summer	2	42	Sunday	August	0.51753	85.3614	6.13759	9.02525	270.196	1.33588	0.619215	398.36	2.87727	21.5937	1.39464	8.5756	91.744	5.75	88.4867
3FUMH_S_3	Female	Omnogobi	Rural	Summer	3	42	Monday	August	0.51753	230.907	23.7928	42.7939	449.807	2.1805	1.16215	886.163	11.1748	89.8095	8.51302	24.0568	156.453	7.304	92.5618
3FUMH_W_1	Female	Omnogobi	Rural	Winter	1	42	Saturday	February	0.579026	79.1449	16.2738	30.3227	119.437	1.56946	0.751382	130.138	12.5906	24.1067	2.56436	25.9025	76.3645	0	131.481
3FUMH_W_2	Female	Omnogobi	Rural	Winter	2	42	Sunday	February	0.463221	49.2353	8.98027	10.8778	55.7291	0.917598	0.529631	64.72	5.0745	14.3856	1.7845	9.86761	95.8737	2.288	130.055
3FUMH_W_3	Female	Omnogobi	Rural	Winter	3	42	Monday	March	0.463221	28.4944	5.7219	9.91774	218.76	1.15038	0.59408	227.075	3.8658	21.1633	2.27979	11.4996	115.841	0	191.21
4FUMH_S_1	Female	Omnogobi	Rural	Summer	1	47	Tuesday	September	0.620118	153.962	18.9462	23.2486	1035.13	2.88803	2.49333	1121.54	10.0483	151.085	11.7844	22.7631	372.251	11.2	441.827
4FUMH_S_2	Female	Omnogobi	Rural	Summer	2	47	Wedesday	September	0.620118	35.8633	5.29696	9.19365	199.413	1.03278	0.371414	285.133	3.69325	22.7917	1.8061	9.98318	58.5166	7.704	264.012
4FUMH_S_3	Female	Omnogobi	Rural	Summer	3	47	Thursday	September	0.620118	14.0383	2.76283	4.17137	123.153	0.587364	0.21388	145.973	1.33811	11.7855	1.21831	4.78368	134.485	0	112.988
4FUMH_W_1	Female	Omnogobi	Rural	Winter	1	46	Sunday	February	0.463341	22.9617	3.20059	6.56096	46.3717	0.678909	0.284177	98.3694	2.40985	6.51151	0.679474	7.42695	17.176	7.032	109.78
4FUMH_W_2	Female	Omnogobi	Rural	Winter	2	46	Monday	March	0.463341	159.861	16.3965	15.884	64.5854	1.77891	0.763694	106.841	3.4301	8.77367	4.91917	15.0106	318.055	78.074	141.467
4FUMH_W_3	Female	Omnogobi	Rural	Winter	3	46	Tuesday	March	0.579176	172.811	13.3991	13.722	150.157	1.05638	0.650362	171.247	4.94104	13.7646	4.93296	12.5743	272.807	15.048	106.708
5FUMH_S_1	Female	Omnogobi	Rural	Summer	1	57	Sunday	September	0.496094	24.0011	2.55923	3.22022	146.281	0.478642	0.194805	170.764	1.17528	12.5862	1.12761	4.58034	36.4467	0	89.3625
5FUMH_S_2	Female	Omnogobi	Rural	Summer	2	57	Monday	September	0.496094	27.8588	2.91642	6.01791	387.694	0.959433	0.399617	416.554	2.16419	35.7453	2.68976	7.33235	71.585	0	77.3269
5FUMH_S_3	Female	Omnogobi	Rural	Summer	3	57	Tuesday	September	0.620118	46.3143	6.96748	8.6407	326.946	0.870028	0.727388	351.617	2.51142	26.4665	1.63137	5.2618	123.62	0	91.7943
6FUMH_S_1	Female	Omnogobi	Rural	Summer	1	42	Friday	August	0.646912	161.241	28.0478	29.2111	231.928	2.11896	1.5708	318.163	6.86259	23.0183	35.0321	36.7988	419.786	11.676	223.199
6FUMH_S_2	Female	Omnogobi	Rural	Summer	2	42	Saturday	August	0.646912	98.101	11.0067	22.7118	436.18	1.54497	0.575727	508.339	13.9845	34.6243	2.41747	23.3829	98.0585	0	83.216
6FUMH_S_3	Female	Omnogobi	Rural	Summer	3	42	Sunday	August	0.51753	49.9552	2.48283	3.96616	316.438	0.665494	0.334728	330.262	2.63111	26.8898	1.40838	5.17464	31.1801	0	131.904
7FUMH_S_1	Female	Omnogobi	Rural	Summer	1	47	Tuesday	July	0.620118	52.9558	7.30229	12.5297	140.196	0.738973	0.29899	192.886	5.0909	19.2305	2.13358	12.8308	117.777	0	78.9834
7FUMH_S_2	Female	Omnogobi	Rural	Summer	2	47	Wedesday	July	0.620118	48.267	5.06904	11.9908	383.312	1.29368	0.459223	429.8	5.53384	42.3431	1.89426	13.4432	0.756559	0	431.998
7FUMH_S_3	Female	Omnogobi	Rural	Summer	3	47	Thursday	July	0.620118	251.855	17.4329	15.4601	576.542	2.35656	1.32291	668.042	2.71967	59.2279	12.1293	13.1882	440.222	34.236	628.332
7FUMH_W_1	Female	Omnogobi	Rural	Winter	1	47	Friday	January	0.579176	37.4887	14.5426	17.9279	42.8217	1.42403	0.643266	44.618	6.45171	13.0058	2.72867	16.5817	171.344	14.4	101.271
7FUMH_W_2	Female	Omnogobi	Rural	Winter	2	47	Saturday	January	0.579176	26.9269	7.94272	8.51248	268.473	1.17028	0.675402	278.301	4.24244	33.94	1.81497	7.68508	0.70418	0	245.71
7FUMH_W_3	Female	Omnogobi	Rural	Winter	3	47	Sunday	January	0.463341	49.9233	11.2271	9.09006	155.758	0.812714	0.629127	162.855	5.12172	21.6883	2.65296	6.24805	151.083	0	96.9147
9FUMH_S_1	Female	Omnogobi	Rural	Summer	1	47	Tuesday	July	0.620118	124.434	8.69595	10.9859	1602.91	2.65626	1.12135	1725.05	3.82135	103.493	12.4858	15.9881	152.526	8.876	146.365
9FUMH_S_2	Female	Omnogobi	Rural	Summer	2	47	Wedesday	July	0.620118	160.268	23.3866	38.6248	4758.24	5.00925	1.4655	4781.4	66.298	51.9468	5.71989	25.9276	137.246	0	193.306
9FUMH_S_3	Female	Omnogobi	Rural	Summer	3	47	Thursday	July	0.620118	157.899	14.6281	16.6622	285.411	2.26184	1.02406	336.518	4.98475	21.9954	9.488	17.6388	315.347	18.188	224.686
9FUMH_W_1	Female	Omnogobi	Rural	Winter	1	47	Wedesday	January	0.579176	182.758	25.9903	38.5953	193.169	5.06678	1.33858	325.883	10.8332	7.9636	4.05945	39.8008	268.334	0.95	87.5036
9FUMH_W_2	Female	Omnogobi	Rural	Winter	2	47	Thursday	January	0.579176	91.9492	32.0768	52.2719	61.768	4.79975	1.19728	62.3308	10.181	10.3992	7.57146	53.4525	419.182	1.39	146.408
9FUMH_W_3	Female	Omnogobi	Rural	Winter	3	47	Friday	January	0.579176	143.18	22.142	29.6236	475.402	3.48458	1.02273	521.02	7.81122	44.5401	4.70789	30.6559	344.128	25.05	471.157
10MUMH_S_1	Male	Omnogobi	Rural	Summer	1	42	Tuesday	July	0.710438	66.2572	11.1684	22.4075	149.716	1.70455	0.595667	166.131	6.39348	12.6665	2.83991	13.3591	32.6402	0	261.193
10MUMH_S_2	Male	Omnogobi	Rural	Summer	2	42	Wedesday	July	0.710438	285.295	25.9445	38.7692	16772.2	10.0657	1.03823	16802.2	173.517	7.78398	10.8397	26.99	361.982	16.832	93.8656
10MUMH_S_3	Male	Omnogobi	Rural	Summer	3	42	Thursday	July	0.710438	110.836	23.8262	32.2365	2977.86	3.51441	0.925785	3040.69	45.8483	19.6838	4.63658	26.6178	291.697	69.3	79.2888
10MUMH_W_1	Male	Omnogobi	Rural	Winter	1	42	Saturday	January	0.659437	160.908	29.1253	37.5613	0	3.10088	1.22367	357.87	7.62294	2.22591	18.2367	36.8198	593.621	66.248	0
10MUMH_W_2	Male	Omnogobi	Rural	Winter	2	42	Sunday	January	0.52755	90.6133	22.0088	48.016	26.5672	3.65632	0.96747	62.3485	8.79629	3.56943	6.41213	48.8985	71.2294	29.7	56.7968
10MUMH_W_3	Male	Omnogobi	Rural	Winter	3	42	Monday	January	0.52755	105.245	26.3619	30.5132	2.48673	2.96363	0.761841	36.8343	6.48676	3.55941	4.84186	31.4997	535.707	0	0
11MUMH_S_1	Male	Omnogobi	Rural	Summer	1	42	Friday	July	0.710438	263.899	26.3544	32.1729	3471.9	4.29659	1.33416	3535.15	51.3965	24.425	12.8433	23.3951	354.833	27.312	197.286
11MUMH_S_2	Male	Omnogobi	Rural	Summer	2	42	Saturday	July	0.710438	58.2979	12.5327	16.4083	246.621	1.65229	0.646597	324.787	5.21609	15.1675	6.47919	17.6235	308.39	9.572	151.467
11MUMH_S_3	Male	Omnogobi	Rural	Summer	3	42	Sunday	August	0.56835	26.99	4.18081	5.07025	631.373	1.25142	0.467022	681.03	3.29203	57.97	2.47978	6.8681	137.265	7.68	335.265
11MUMH_W_1	Male	Omnogobi	Rural	Winter	1	42	Sunday	January	0.52755	240.612	42.5649	80.9329	164.777	7.24226	2.23377	253.79	14.8624	16.976	9.46146	77.3527	104.023	0	87.3802
11MUMH_W_2	Male	Omnogobi	Rural	Winter	2	42	Monday	January	0.52755	117.182	13.8698	25.431	1218.33	2.42365	0.817683	1264.31	12.8045	59.6343	7.14866	28.9565	76.7591	2.288	142.15
11MUMH_W_3	Male	Omnogobi	Rural	Winter	3	42	Tuesday	January	0.659437	172.877	17.7593	23.7517	294.604	1.52331	0.984844	2353.45	6.73269	28.1808	6.61405	17.7686	363.901	12.192	81.6797
12MUMH_S_1	Male	Omnogobi	Rural	Summer	1	52	Friday	July	0.535823	93.7612	7.75786	12.1808	150.515	1.11003	0.30515	203.62	5.02566	19.5448	6.00894	12.2512	177.982	10.724	156.172
12MUMH_S_2	Male	Omnogobi	Rural	Summer	2	52	Saturday	July	0.535823	42.5304	7.8452	12.031	410.188	1.69491	0.620567	446.203	5.84221	28.8346	2.10902	14.4289	141.674	0	384.558
12MUMH_S_3	Male	Omnogobi	Rural	Summer	3	52	Sunday	August	0.428658	10.7879	1.89847	3.88489	286.162	1.10978	0.314058	327.462	1.22508	30.5	0.983326	4.58735	78.367	0	583.863
12MUMH_W_1	Male	Omnogobi	Rural	Winter	1	52	Saturday	January	0.559527	130.043	29.2174	47.5573	327.446	3.21034	1.20336	423.412	10.6183	27.9155	13.6937	31.8647	302.427	18.2	188.609
12MUMH_W_2	Male	Omnogobi	Rural	Winter	2	52	Sunday	January	0.447622	228.334	33.4469	30.6125	197.544	3.02873	2.1025	311.368	6.79267	14.5936	15.7471	20.2966	561.566	16.464	92.0098
12MUMH_W_3	Male	Omnogobi	Rural	Winter	3	52	Monday	January	0.447622	62.8968	11.7773	10.816	432.125	1.79	0.9249	483.865	3.02182	37.2535	8.06679	8.59936	154.944	0	258.738
1MUMH_S_1	Male	Omnogobi	Rural	Summer	1	32	Wedesday	August	1.35731	80.0893	11.0524	21.1139	247.243	1.71159	0.715895	611.747	8.4461	32.9601	2.33727	20.0553	44.4019	7.44	249.136
1MUMH_S_2	Male	Omnogobi	Rural	Summer	2	32	Thursday	August	1.35731	67.3008	5.98042	12.5496	280.321	1.35832	0.555451	333.587	5.78174	35.3587	2.1402	12.451	22.2181	0	270.004
1MUMH_S_3	Male	Omnogobi	Rural	Summer	3	32	Friday	August	1.35731	31.7012	3.0205	5.09868	95.13	0.34012	0.3495	124.2	2.16911	14.9979	1.34976	3.87676	5.378	0	0
2MUMH_S_1	Male	Omnogobi	Rural	Summer	1	42	Saturday	August	0.710438	120.531	6.63963	17.5253	286.195	0.870933	0.799913	426.898	6.75141	31.8379	2.62385	14.8125	5.01916	0	28.8055
2MUMH_S_2	Male	Omnogobi	Rural	Summer	2	42	Sunday	August	0.56835	138.457	18.2419	41.3136	264.331	2.05474	1.16751	273.26	17.0722	51.6143	2.36427	39.6175	65.7168	0	116.427
2MUMH_S_3	Male	Omnogobi	Rural	Summer	3	42	Monday	August	0.56835	43.6453	3.66994	7.00294	298.053	0.794296	0.307189	309.777	5.01716	14.1157	0.972618	8.52251	62.2123	0	43.7441
2MUMH_W_1	Male	Omnogobi	Rural	Winter	1	42	Sunday	March	0.52755	85.4504	11.965	21.1559	92.1573	1.40593	0.479841	186.996	9.01839	24.1224	1.58897	22.322	182.866	48.546	219.364
2MUMH_W_2	Male	Omnogobi	Rural	Winter	2	42	Monday	March	0.52755	103.875	47.0667	56.817	72.2617	2.68883	1.34842	127.807	23.5092	12.7444	5.43841	33.3018	152.187	8.52	161.055
2MUMH_W_3	Male	Omnogobi	Rural	Winter	3	42	Tuesday	March	0.659437	31.9001	12.5509	11.8363	129.148	1.34861	0.373936	153.628	7.4705	20.2048	2.03384	10.7512	186.029	0	297.912
3MUMH_S_1	Male	Omnogobi	Rural	Summer	1	32	Monday	August	1.08585	94.2565	9.24149	10.2891	149.347	1.05216	0.644308	218.376	3.14932	16.3048	7.79295	11.216	255.071	15.4	79.9248
3MUMH_S_2	Male	Omnogobi	Rural	Summer	2	32	Tuesday	September	1.35731	82.626	3.34561	6.50694	38.009	0.765113	0.578229	112.76	1.66414	13.6005	0.706046	6.93182	0	11.52	87.9173
3MUMH_S_3	Male	Omnogobi	Rural	Summer	3	32	Wedesday	September	1.35731	57.899	11.9658	14.5751	71.7256	1.20863	0.55491	173.746	3.37488	8.87707	7.69248	14.8399	304.752	13.44	123.377
3MUMH_W_1	Male	Omnogobi	Rural	Winter	1	32	Friday	March	1.29587	261.387	40.0776	81.8117	178.697	4.16699	1.31883	261.33	36.9659	64.7069	5.42271	81.5854	222.459	5.28	317.373
3MUMH_W_2	Male	Omnogobi	Rural	Winter	2	32	Saturday	March	1.29587	185.4	20.2689	43.1145	336.674	2.99802	1.01018	412.613	21.4127	61.7662	4.08762	43.8339	128.16	5.72	477.726
3MUMH_W_3	Male	Omnogobi	Rural	Winter	3	32	Sunday	March	1.0367	102.603	15.9425	24.6257	115.899	1.64562	0.531696	228.911	10.4361	29.9036	4.55396	25.7242	538.681	22.72	258.61
4MUMH_S_1	Male	Omnogobi	Rural	Summer	1	37	Tuesday	September	0.710438	39.0645	7.31366	9.3902	157.163	1.02025	0.694162	192.927	1.73583	16.7774	1.64232	6.88193	190.754	0	129.928
4MUMH_S_2	Male	Omnogobi	Rural	Summer	2	37	Wedesday	September	0.710438	38.2319	6.446	8.20653	28.7042	0.556428	0.329643	33.8347	3.47591	14.2661	0.999983	8.93011	136.037	37.05	67.8531
4MUMH_S_3	Male	Omnogobi	Rural	Summer	3	37	Thursday	September	0.710438	16.9209	1.91677	3.76739	50.4136	0.317156	0.106094	56.022	1.85884	6.47837	0.253217	4.17469	34.9358	0	65.8853
4MUMH_W_1	Male	Omnogobi	Rural	Winter	1	37	Wedesday	March	0.659437	79.7116	13.0527	22.0284	139.654	1.41625	0.431115	218.47	9.64264	28.1317	6.59992	23.0275	239.942	11.62	205.536
4MUMH_W_2	Male	Omnogobi	Rural	Winter	2	37	Thursday	March	0.659437	168.135	28.2841	43.9292	3926.73	4.76362	0.890417	3987.05	75.7618	30.8773	8.48719	36.0367	223.817	13.44	264.801
4MUMH_W_3	Male	Omnogobi	Rural	Winter	3	37	Friday	March	0.659437	55.2909	20.408	40.6046	133.524	2.90262	1.3316	150.322	9.73277	13.1842	8.20737	42.1138	155.294	0	137.336
5MUMH_S_1	Male	Omnogobi	Rural	Summer	1	47	Friday	September	0.535823	100.578	26.7991	45.7282	84.0523	3.37666	1.40981	96.0873	10.5499	12.518	7.56322	45.5308	401.696	109.05	190.963
5MUMH_S_2	Male	Omnogobi	Rural	Summer	2	47	Saturday	September	0.535823	22.5099	0.843649	1.08703	358.022	1.73903	0.286843	364.597	2.11567	32.7384	1.2068	4.4316	0.453506	0	566.701
5MUMH_S_3	Male	Omnogobi	Rural	Summer	3	47	Sunday	September	0.428658	123.959	16.1849	33.7014	287.724	1.73691	0.730483	393.078	18.3641	40.1387	2.59907	32.8028	147.847	0	143.185
5MUMH_W_1	Male	Omnogobi	Rural	Winter	1	47	Thursday	February	0.559527	189.878	33.1004	68.4264	109.616	5.28566	1.75436	141.755	14.4701	16.8343	12.2118	68.7072	151.7	11.88	241.928
5MUMH_W_2	Male	Omnogobi	Rural	Winter	2	47	Friday	February	0.559527	120.766	18.5075	33.4869	82.1047	1.7723	0.577525	153.463	14.3736	31.2797	3.32946	34.529	279.455	0.792	185.636
5MUMH_W_3	Male	Omnogobi	Rural	Winter	3	47	Saturday	February	0.559527	346.338	36.3753	65.5934	350.279	4.22318	2.41792	429.98	21.8942	51.9066	13.3583	67.1499	335.577	31.8	210.229
6MUMH_S_1	Male	Omnogobi	Rural	Summer	1	57	Thursday	September	0.535823	70.5603	6.86529	7.574	13.0231	0.592164	0.34988	53.928	1.90536	1.90832	5.26685	7.4534	181.088	13.176	27.6543
6MUMH_S_2	Male	Omnogobi	Rural	Summer	2	57	Friday	September	0.535823	87.7558	9.40782	18.7409	116.8	1.2937	0.68093	125.365	5.72815	9.55801	4.29224	18.5567	50.1914	6.776	76.8148
6MUMH_S_3	Male	Omnogobi	Rural	Summer	3	57	Saturday	September	0.535823	86.3939	16.0593	29.6866	63.6653	1.83756	0.879322	115.116	8.58381	10.3714	9.67995	29.8742	213.561	14.648	70.4136
7MUMH_S_1	Male	Omnogobi	Rural	Summer	1	43	Tuesday	September	0.710438	38.1992	6.34088	8.23266	151.132	0.974119	0.655862	179.987	2.60702	13.2238	1.33038	7.26309	99.0388	0	93.5111
7MUMH_S_2	Male	Omnogobi	Rural	Summer	2	43	Wedesday	September	0.710438	23.4598	2.66496	6.16308	120.972	1.17701	0.31033	136.105	2.83618	8.84144	0.846153	8.05753	0.254287	0	154.91
7MUMH_S_3	Male	Omnogobi	Rural	Summer	3	43	Thursday	September	0.710438	131.344	7.40749	10.4667	59.7202	1.0827	0.767435	113.716	2.49484	12.0491	3.22556	9.60971	81.9558	10.912	132.377
8MUMH_S_1	Male	Omnogobi	Rural	Summer	1	32	Saturday	August	1.35731	97.5488	13.9438	13.7059	168.006	1.2071	0.622387	211.433	4.02746	10.7876	4.09478	14.0726	273.085	44.86	105.492
8MUMH_S_2	Male	Omnogobi	Rural	Summer	2	32	Sunday	August	1.08585	104.422	19.8111	23.4495	318.79	1.61936	0.654399	2588.14	8.79117	38.624	11.2239	24.8935	471.686	17.276	179.174
8MUMH_S_3	Male	Omnogobi	Rural	Summer	3	32	Monday	August	1.08585	177.28	16.8586	27.6447	0	1.42271	0.890464	323.417	7.51848	7.92805	8.17819	25.4542	376.093	33.19	0
8MUMH_W_1	Male	Omnogobi	Rural	Winter	1	32	Saturday	February	1.29587	87.2484	17.8763	31.4561	470.711	2.0574	0.738608	510.935	15.3697	45.485	3.87159	31.8191	138.653	0	226.836
8MUMH_W_2	Male	Omnogobi	Rural	Winter	2	32	Sunday	February	1.0367	151.074	16.174	32.5666	68.3784	1.66619	0.608328	162.417	14.0692	28.4686	3.15582	32.7654	147.615	6.688	156.669
8MUMH_W_3	Male	Omnogobi	Rural	Winter	3	32	Monday	March	1.0367	105.451	19.623	27.0044	81.4554	1.58294	0.544128	182.976	10.6128	23.9844	11.6698	27.8992	518.69	22.948	153.502
9MUMH_S_1	Male	Omnogobi	Rural	Summer	1	48	Tuesday	July	0.535823	129.902	12.1218	13.1887	89.5687	1.39123	0.678528	139.085	7.78908	12.5272	4.09925	16.7875	150.304	10.373	202.151
9MUMH_S_2	Male	Omnogobi	Rural	Summer	2	48	Wedesday	July	0.535823	26.5653	3.40092	3.57753	140.778	0.429915	0.351471	493.989	0.243934	13.4089	0.957165	1.45793	35.4227	0	51.2373
9MUMH_S_3	Male	Omnogobi	Rural	Summer	3	48	Thursday	July	0.535823	125.644	8.66934	9.19567	212.838	0.771649	0.432569	252.666	4.31298	14.9429	6.53898	8.6374	212.598	18.1	92.3058
9MUMH_W_1	Male	Omnogobi	Rural	Winter	1	48	Tuesday	December	0.559527	34.4378	9.32494	12.579	274.766	1.29903	0.510327	309.096	4.30695	20.361	2.89697	14.095	203.064	0	166.632
9MUMH_W_2	Male	Omnogobi	Rural	Winter	2	48	Wedesday	December	0.559527	214.816	22.0371	29.3603	73.0277	2.79775	1.45669	170.467	7.26616	14.7456	6.05693	26.9281	324.726	15.4	155.929
9MUMH_W_3	Male	Omnogobi	Rural	Winter	3	48	Thursday	December	0.559527	189.44	22.0526	28.8537	96.7317	2.93376	1.15801	102.637	5.85125	16.7081	7.0529	28.4737	314.838	69.628	216.04
10FEN_S_1	Female	Sukhbaatar	Rural	Summer	1	48	Thursday	August	0.620118	55.5334	8.84579	11.5218	158.997	0.835965	0.567677	211.137	3.43884	18.8807	4.14389	9.22789	192.258	5.852	67.568
10FEN_S_2	Female	Sukhbaatar	Rural	Summer	2	48	Friday	August	0.620118	72.3445	8.15751	13.0324	118.263	0.872072	0.358228	174.053	5.36288	19.3242	3.6146	13.159	133.988	6.512	120.496
10FEN_S_3	Female	Sukhbaatar	Rural	Summer	3	48	Saturday	August	0.620118	44.7998	11.2491	10.3392	196.6	0.9405	0.474584	210.144	6.12998	14.3634	2.06003	7.64679	175.586	1.32	135.706
10FEN_W_1	Female	Sukhbaatar	Rural	Winter	1	48	Wedesday	February	0.579176	63.7411	18.3044	14.6007	320.98	1.51612	0.522084	344.322	10.3975	28.5571	3.57725	12.6934	266.327	0	240.042
10FEN_W_2	Female	Sukhbaatar	Rural	Winter	2	48	Thursday	February	0.579176	44.945	8.69906	13.787	298.311	1.31857	0.464714	341.242	6.91129	29.7367	3.04428	17.6022	129.147	0	207.35
10FEN_W_3	Female	Sukhbaatar	Rural	Winter	3	48	Friday	February	0.579176	37.8187	17.9035	14.4823	116.538	1.38083	0.46751	144.367	9.70953	17.7215	2.94237	12.9829	270.02	0	235.58
1FEN_S_1	Female	Sukhbaatar	Rural	Summer	1	27	Thursday	August	1.10244	60.5393	10.0973	13.2907	1422.48	2.19182	0.801465	1443.49	14.6113	33.1353	3.52697	9.60904	100.949	0	249.354
1FEN_S_2	Female	Sukhbaatar	Rural	Summer	2	27	Friday	August	1.10244	67.9124	10.1286	17.8529	298.127	1.90991	0.518441	329.266	8.63109	36.2209	2.51905	18.8378	37.835	0	413.851
1FEN_S_3	Female	Sukhbaatar	Rural	Summer	3	27	Saturday	August	1.10244	111.562	9.87429	13.224	734.114	1.60998	0.860432	811.665	5.45873	32.4842	5.86291	10.1506	151.931	0	243.582
1FEN_W_1	Female	Sukhbaatar	Rural	Winter	1	27	Wedesday	February	1.1982	71.5111	12.0809	11.0293	319.968	1.50626	0.725812	431.771	5.88159	28.8185	4.31237	7.75025	249.857	10.764	296.681
1FEN_W_2	Female	Sukhbaatar	Rural	Winter	2	27	Thursday	February	1.1982	136.851	18.156	24.3282	741.537	2.86422	2.09292	765.674	4.79386	75.9747	3.7298	12.9777	317.465	0	458.598
1FEN_W_3	Female	Sukhbaatar	Rural	Winter	3	27	Friday	February	1.1982	53.3288	8.35251	14.6099	151.215	1.36845	0.655728	201.729	4.73939	21.7403	1.67243	13.3762	211.862	4.08	220.573
2FEN_S_1	Female	Sukhbaatar	Rural	Summer	1	45	Thursday	August	0.620118	39.3306	11.9587	12.1543	143.668	1.25629	0.528986	217.272	6.71461	19.5038	2.84115	9.55317	145.892	12.08	240.046
2FEN_S_2	Female	Sukhbaatar	Rural	Summer	2	45	Friday	August	0.620118	105.608	19.5471	27.1495	2016.01	3.00807	0.957805	2055.26	35.6925	34.1985	5.9313	17.9941	143.671	5.936	269.492
2FEN_S_3	Female	Sukhbaatar	Rural	Summer	3	45	Saturday	August	0.620118	82.549	11.5713	11.118	289.78	1.53596	0.779544	365.693	4.08743	28.6866	5.4347	8.46676	209.507	6.608	260.018
2FEN_W_1	Female	Sukhbaatar	Rural	Winter	1	45	Wedesday	February	0.579176	83.3092	16.081	19.2772	86.0065	1.54579	0.690661	476.664	7.63457	149.033	6.52811	12.2215	228.554	15.063	167.211
2FEN_W_2	Female	Sukhbaatar	Rural	Winter	2	45	Thursday	February	0.579176	277.809	24.2012	20.7409	432.428	2.40993	1.75922	443.043	6.67159	47.1351	7.94404	10.7051	427.955	23.76	382.712
2FEN_W_3	Female	Sukhbaatar	Rural	Winter	3	45	Friday	February	0.579176	24.843	7.81727	6.82235	245.748	1.36874	0.457213	284.201	4.22263	27.9972	2.57363	5.95752	110.963	2.24	360.584
3FEN_S_1	Female	Sukhbaatar	Rural	Summer	1	46	Thursday	August	0.620118	253.692	42.9527	67.6003	6826.03	7.71085	1.74613	6878.49	127.119	33.5776	5.02061	49.4117	122.24	3.36	286.459
3FEN_S_2	Female	Sukhbaatar	Rural	Summer	2	46	Friday	August	0.620118	55.7915	10.0332	17.54	532.331	1.74752	0.86019	590.643	3.8671	42.4179	7.50133	18.8913	135.394	6.076	202.618
3FEN_S_3	Female	Sukhbaatar	Rural	Summer	3	46	Saturday	August	0.620118	37.1415	6.53196	9.75891	281.103	1.32599	0.589884	364.926	2.83766	27.0906	2.40082	10.0304	89.7956	5.976	248.338
3FEN_W_1	Female	Sukhbaatar	Rural	Winter	1	45	Wedesday	February	0.579176	26.4951	6.29498	7.1439	239.9	1.15846	0.345265	283.167	4.40768	21.4425	3.12732	10.5004	160.802	2.492	256.278
3FEN_W_2	Female	Sukhbaatar	Rural	Winter	2	45	Thursday	February	0.579176	78.0699	32.5564	26.5306	295.115	2.31817	0.922954	367.324	16.7096	30.9414	8.70189	24.3822	540.697	7.784	325.612
4FEN_S_1	Female	Sukhbaatar	Rural	Summer	1	38	Thursday	August	0.646912	52.4669	15.1763	14.6345	100.91	1.40703	0.755988	120.012	6.63582	14.8792	2.05083	10.0775	236.972	0	212.44
4FEN_S_2	Female	Sukhbaatar	Rural	Summer	2	38	Friday	August	0.646912	181.379	19.2458	15.5184	62.4879	1.22398	0.798321	116.685	7.97869	7.68638	5.10791	9.79381	231.22	18.352	113.174
4FEN_S_3	Female	Sukhbaatar	Rural	Summer	3	38	Saturday	August	0.646912	127.336	13.5235	20.0624	167.112	1.74507	0.668372	268.113	7.92438	28.5949	7.66402	20.3857	323.71	17.104	302.856
4FEN_W_1	Female	Sukhbaatar	Rural	Winter	1	38	Wedesday	February	0.579026	60.4181	14.9871	13.8957	35.2118	0.997987	0.639147	51.2008	6.62009	5.56258	2.21279	8.48491	224.265	1.936	81.8088
4FEN_W_2	Female	Sukhbaatar	Rural	Winter	2	38	Thursday	February	0.579026	118.403	33.7834	28.6173	64.2065	1.91476	0.942124	97.6401	17.4897	10.5552	8.59412	24.3531	464.184	13.232	143.865
4FEN_W_3	Female	Sukhbaatar	Rural	Winter	3	38	Friday	February	0.579026	51.5331	15.4219	11.7459	167.045	0.945697	0.406834	218.925	7.2696	15.4224	5.73037	8.24485	247.889	8.12	105.748
5FEN_S_1	Female	Sukhbaatar	Rural	Summer	1	39	Thursday	August	0.646912	79.4419	13.3779	15.6195	132.925	1.54182	0.74358	193.939	3.85827	15.0149	3.72487	15.5725	284.462	40.022	192.781
5FEN_S_2	Female	Sukhbaatar	Rural	Summer	2	39	Friday	August	0.646912	43.2804	8.39209	6.30578	198.834	1.59544	0.479794	220.548	2.57401	25.8967	2.3975	7.8363	326.878	1.34	480.872
5FEN_S_3	Female	Sukhbaatar	Rural	Summer	3	39	Saturday	August	0.646912	112.269	18.7248	29.907	4402.57	4.26893	0.892275	4403.03	56.2477	32.1635	2.78163	18.5571	39.2762	0	344.661
5FEN_W_1	Female	Sukhbaatar	Rural	Winter	1	39	Wedesday	February	0.579026	79.2951	24.4	22.5504	291.314	2.39684	0.882616	382.45	13.0886	45.7727	5.20567	23.2624	417.523	0	398.655
5FEN_W_2	Female	Sukhbaatar	Rural	Winter	2	39	Thursday	February	0.579026	53.9963	39.2995	36.4356	416.463	4.10059	1.27407	483.466	21.2012	53.4953	8.94441	27.7782	221.887	12.124	886.904
5FEN_W_3	Female	Sukhbaatar	Rural	Winter	3	39	Friday	February	0.579026	66.7604	38.3461	27.308	277.717	3.05789	1.03978	367.845	18.338	38.4164	10.1153	20.7892	550.756	13.272	599.133
6FEN_S_1	Female	Sukhbaatar	Rural	Summer	1	31	Thursday	August	1.10244	126.988	19.6075	32.0348	7766.5	6.0763	1.00549	7788.19	80.6558	63.1651	6.51321	23.6678	5.76132	4.7	403.767
6FEN_S_2	Female	Sukhbaatar	Rural	Summer	2	31	Friday	August	1.10244	168.704	13.7826	13.0526	291.494	1.44019	0.750331	317.792	3.40808	23.5522	5.19962	9.97194	320.888	11.352	216.539
6FEN_S_3	Female	Sukhbaatar	Rural	Summer	3	31	Saturday	August	1.10244	60.2149	11.5485	20.661	2318.67	3.19906	0.623612	2334.8	28.5465	33.3616	3.18691	16.7732	15.3105	0	456.741
6FEN_W_1	Female	Sukhbaatar	Rural	Winter	1	31	Wedesday	February	1.1982	38.0037	9.03671	5.01143	40.7042	0.923462	0.524311	40.9346	3.19841	14.1501	1.22923	7.06812	151.361	0	94.1514
6FEN_W_2	Female	Sukhbaatar	Rural	Winter	2	31	Thursday	February	1.1982	102.676	18.288	15.986	356.125	1.98217	1.31902	420.321	6.58634	26.7926	3.01431	11.1297	227.961	7.44	217.555
6FEN_W_3	Female	Sukhbaatar	Rural	Winter	3	31	Friday	February	1.1982	55.9116	10.3596	10.3244	604.87	1.50516	0.850522	656.065	6.23362	38.7543	3.03293	7.33048	114.863	5.304	267.802
7FEN_S_1	Female	Sukhbaatar	Rural	Summer	1	28	Thursday	August	1.10244	71.9232	12.2687	13.8853	349.294	1.79969	1.13993	410.492	2.59942	32.8519	5.11961	10.0875	241.283	5.348	228.964
7FEN_S_2	Female	Sukhbaatar	Rural	Summer	2	28	Friday	August	1.10244	54.5046	7.14813	10.0491	193.662	1.70246	0.766567	214.941	3.00849	17.0196	1.53691	9.36617	94.8637	0	240.431
7FEN_S_3	Female	Sukhbaatar	Rural	Summer	3	28	Saturday	August	1.10244	49.325	8.06613	10.5584	233.895	1.58886	0.75124	285.666	2.39042	24.4196	4.08973	8.48979	153.763	4.928	293.963
7FEN_W_1	Female	Sukhbaatar	Rural	Winter	1	28	Wedesday	February	1.1982	21.2273	6.53009	6.13017	43.1187	0.540996	0.1877	83.7863	3.33757	7.28985	3.12764	5.3638	123.947	5.628	98.0378
7FEN_W_2	Female	Sukhbaatar	Rural	Winter	2	28	Thursday	February	1.1982	38.8539	12.8793	14.8851	36.0156	0.946118	0.380082	84.798	8.89455	7.90299	2.00728	15.6684	113.191	7.488	85.1364
7FEN_W_3	Female	Sukhbaatar	Rural	Winter	3	28	Friday	February	1.1982	58.5926	7.90302	13.8029	340.072	0.852335	0.407495	387.403	7.10218	25.9138	2.68872	13.2492	41.4582	0	73.1483
8FEN_S_1	Female	Sukhbaatar	Rural	Summer	1	35	Thursday	August	0.646912	49.4881	19.1353	17.0406	183.571	1.35509	0.78177	249.213	7.89415	17.6054	6.09648	10.2111	260.958	12.712	165.895
8FEN_S_2	Female	Sukhbaatar	Rural	Summer	2	35	Friday	August	0.646912	99.9257	16.8136	17.4647	251.333	2.1939	1.50919	282.152	4.01162	25.6841	4.58021	8.06758	276.09	5.544	329.464
8FEN_S_3	Female	Sukhbaatar	Rural	Summer	3	35	Saturday	August	0.646912	170.51	12.1722	12.8203	232.789	1.40468	1.18385	261.266	1.70361	20.2194	4.8814	7.47356	321.987	13.024	156.445
8FEN_W_1	Female	Sukhbaatar	Rural	Winter	1	35	Wedesday	February	0.579026	144.092	27.1716	33.6571	4528.54	4.05769	0.957799	4574.81	70.1096	190.699	5.98396	19.2596	190.698	8.39	29.2525
8FEN_W_2	Female	Sukhbaatar	Rural	Winter	2	35	Thursday	February	0.579026	103.117	19.3119	17.2967	292.94	1.17179	0.902214	323.391	7.67435	21.6666	4.01624	11.6321	293.301	0	0
8FEN_W_3	Female	Sukhbaatar	Rural	Winter	3	35	Friday	February	0.579026	51.9716	17.647	16.2695	1.65223	0.849453	0.573405	24.0021	7.44234	0.539187	1.65766	8.8917	122.729	0	0
9FEN_S_1	Female	Sukhbaatar	Rural	Summer	1	40	Thursday	August	0.646912	62.6999	7.05048	6.43603	674.152	1.47744	0.673305	699.348	3.31825	64.1887	3.47655	4.76279	107.601	3.96	370.774
9FEN_S_2	Female	Sukhbaatar	Rural	Summer	2	40	Friday	August	0.646912	88.3828	29.41	24.0225	848.344	3.19935	0.991372	984.03	16.1081	88.7592	14.2336	20.7858	509.981	22.284	724.464
9FEN_S_3	Female	Sukhbaatar	Rural	Summer	3	40	Saturday	August	0.646912	113.223	17.326	21.1403	823.527	2.6193	1.16461	841.074	8.77605	84.4609	4.53076	19.1073	350.028	65.06	476.666
9FEN_W_1	Female	Sukhbaatar	Rural	Winter	1	40	Wedesday	February	0.579026	143.257	20.5323	23.9795	241.315	2.51146	0.92636	379.808	11.791	36.129	6.90425	23.9169	321.399	13.616	471.603
9FEN_W_2	Female	Sukhbaatar	Rural	Winter	2	40	Thursday	February	0.579026	150.885	23.8341	23.9521	520.108	3.31692	1.17815	909.143	14.3916	54.1423	8.83897	20.2538	272.498	22.818	751.364
9FEN_W_3	Female	Sukhbaatar	Rural	Winter	3	40	Friday	February	0.579026	22.3658	8.12968	8.23498	315.327	1.79584	0.502497	339.309	5.18315	35.5022	1.96608	9.10186	52.4592	0	489.83
10MEN_S_1	Male	Sukhbaatar	Rural	Summer	1	53	Thursday	August	0.535823	70.7581	8.99009	12.3671	329.859	1.65765	0.525831	399.974	5.15365	31.7129	5.8079	13.9181	203.025	8.764	235.262
10MEN_S_2	Male	Sukhbaatar	Rural	Summer	2	53	Friday	August	0.535823	47.3188	7.33474	12.9153	131.021	1.09254	0.353684	184.867	5.83229	21.6405	2.91271	13.863	105.121	3.472	198.31
10MEN_S_3	Male	Sukhbaatar	Rural	Summer	3	53	Saturday	August	0.535823	51.2698	14.4448	13.4073	88.8861	1.17842	0.420436	100.187	8.04377	15.1464	2.40473	10.936	214.507	2.024	207.105
1MEN_S_1	Male	Sukhbaatar	Rural	Summer	1	33	Thursday	August	0.710438	67.6263	12.8628	18.9385	564.824	2.16921	0.8735	589.17	6.37425	45.6371	4.18663	11.3552	152.262	0	489.467
1MEN_S_2	Male	Sukhbaatar	Rural	Summer	2	33	Friday	August	0.710438	215	15.9688	37.084	1077.15	2.7937	0.989404	1111.47	23.2958	37.9091	2.6845	24.6327	132.797	0	233.389
1MEN_S_3	Male	Sukhbaatar	Rural	Summer	3	33	Saturday	August	0.710438	71.5937	12.0406	17.0713	245.415	1.41241	0.558786	275.683	6.7992	32.9385	2.65748	16.9217	238.482	45.9	220.074
1MEN_W_1	Male	Sukhbaatar	Rural	Winter	1	33	Wedesday	February	0.659437	110.617	26.5725	26.0676	234.714	1.89064	1.1521	373.631	11.9804	28.959	4.03506	17.3888	618.211	19.92	215.181
1MEN_W_2	Male	Sukhbaatar	Rural	Winter	2	33	Thursday	February	0.659437	95.8216	21.7127	27.4779	753.559	2.07618	1.03529	820.14	15.9584	40.5573	3.64136	18.7677	195.221	0	190.842
1MEN_W_3	Male	Sukhbaatar	Rural	Winter	3	33	Friday	February	0.659437	59.7424	18.4326	16.0691	205.928	1.4508	0.835749	292.496	6.87009	22.7601	8.98294	10.2649	401.629	16.38	193.375
2MEN_S_1	Male	Sukhbaatar	Rural	Summer	1	42	Thursday	August	0.710438	101.044	13.5677	24.3926	119.063	2.23094	1.01794	151.564	6.32034	15.439	5.98463	24.8473	121.147	7.656	264.391
2MEN_S_2	Male	Sukhbaatar	Rural	Summer	2	42	Friday	August	0.710438	149.622	14.7445	16.8232	152.566	1.92589	1.12351	206.058	5.06376	286.737	8.59572	13.3524	313.838	24.614	295.402
2MEN_S_3	Male	Sukhbaatar	Rural	Summer	3	42	Saturday	August	0.710438	74.1763	14.3014	23.7445	350.657	2.2623	1.54895	428.592	7.64867	44.0618	3.89113	19.2639	169.073	0	250.804
2MEN_W_1	Male	Sukhbaatar	Rural	Winter	1	42	Wedesday	February	0.659437	152.171	11.7318	9.17723	4.14255	0.660096	0.401335	67.1146	3.76104	0.592399	7.36076	10.6509	249.423	15.316	0
2MEN_W_2	Male	Sukhbaatar	Rural	Winter	2	42	Thursday	February	0.659437	203.007	9.39593	7.23584	7.81931	0.614641	0.527871	43.2614	2.2264	0.374289	4.3762	6.73842	183.004	15.224	0
2MEN_W_3	Male	Sukhbaatar	Rural	Winter	3	42	Friday	February	0.659437	273.724	15.9625	7.94666	62.6887	1.14914	0.943634	113.187	2.12105	7.09143	7.32541	7.69284	305.895	27.808	115.231
3MEN_S_1	Male	Sukhbaatar	Rural	Summer	1	47	Thursday	August	0.535823	350.505	70.2102	103.105	9590.4	12.1365	2.70073	9698.97	180.554	71.9707	8.08105	78.8055	90.8477	14.136	822.584
3MEN_S_2	Male	Sukhbaatar	Rural	Summer	2	47	Friday	August	0.535823	124.497	26.9526	39.2016	1636.98	4.68697	1.73493	1789.75	26.3522	51.5827	14.4835	37.2677	533.312	22.344	613.261
3MEN_S_3	Male	Sukhbaatar	Rural	Summer	3	47	Saturday	August	0.535823	97.9279	16.4607	22.2917	1327.36	3.14946	1.61551	1465.35	12.0288	77.5264	5.99443	21.9582	239.77	9.48	528.067
3MEN_W_1	Male	Sukhbaatar	Rural	Winter	1	47	Wedesday	February	0.559527	84.225	15.464	21.9347	354.971	2.65497	0.703962	399.952	10.6794	53.7692	6.56342	24.1291	352.637	9.716	623.382
3MEN_W_2	Male	Sukhbaatar	Rural	Winter	2	47	Thursday	February	0.559527	92.4334	30.8781	28.8033	332.902	2.61596	1.12647	406.209	14.9685	36.1115	9.08034	24.2436	392.784	19.554	401.664
3MEN_W_3	Male	Sukhbaatar	Rural	Winter	3	47	Friday	February	0.559527	42.3896	8.564	17.9234	474.129	2.2088	0.856791	539.553	5.50644	43.4393	3.92531	20.0881	63.8194	0	381.551
4MEN_S_1	Male	Sukhbaatar	Rural	Summer	1	33	Thursday	August	0.710438	122.642	17.8354	14.1343	186.527	2.34563	1.38705	237.631	4.0647	25.8021	6.63059	11.6937	365.47	14.116	404.037
4MEN_S_2	Male	Sukhbaatar	Rural	Summer	2	33	Friday	August	0.710438	218.228	27.8154	35.7866	3516.7	6.01342	2.04498	3572.86	50.9232	52.0702	7.24699	28.6525	294.218	7	351.5
4MEN_S_3	Male	Sukhbaatar	Rural	Summer	3	33	Saturday	August	0.710438	166.46	24.8904	34.9943	515.255	3.07555	1.50019	552.368	14.4813	57.133	6.74632	26.7624	378.664	3.752	300.412
4MEN_W_1	Male	Sukhbaatar	Rural	Winter	1	33	Wedesday	February	0.659437	212.571	49.7959	61.0055	4935.14	7.08234	1.65047	5132.03	100.755	39.589	7.6644	46.0681	212.739	57.924	531.125
4MEN_W_2	Male	Sukhbaatar	Rural	Winter	2	33	Thursday	February	0.659437	62.5471	47.8079	44.2615	225.571	3.01869	1.29996	288.311	22.7051	24.9282	9.41413	28.9025	218.216	13.16	352.628
4MEN_W_3	Male	Sukhbaatar	Rural	Winter	3	33	Friday	February	0.659437	163.589	51.414	52.3939	4288.68	6.06815	1.76272	4296.75	86.892	36.5365	6.48175	31.6619	382.795	0	423.006
5MEN_S_1	Male	Sukhbaatar	Rural	Summer	1	32	Thursday	August	1.35731	58.1512	12.2366	14.3798	461.215	1.91759	0.767831	524.445	6.22696	34.5445	3.12455	15.055	216.119	15.45	304.816
5MEN_S_2	Male	Sukhbaatar	Rural	Summer	2	32	Friday	August	1.35731	127.192	19.9928	29.4145	4290.22	5.69527	1.22419	4518.31	60.7414	120.404	6.11509	26.5157	76.12	0	767.936
5MEN_S_3	Male	Sukhbaatar	Rural	Summer	3	32	Saturday	August	1.35731	154.108	23.6503	34.2241	3446.48	5.86977	1.42698	3540.18	49.394	107.336	11.6173	33.289	239.688	14.196	887.965
5MEN_W_1	Male	Sukhbaatar	Rural	Winter	1	32	Wedesday	February	1.29587	52.5208	16.982	17.2196	98.8398	1.38221	0.49959	169.568	9.7294	18.6842	2.49492	14.9153	228.852	40.428	233.645
5MEN_W_2	Male	Sukhbaatar	Rural	Winter	2	32	Thursday	February	1.29587	103.988	12.8385	26.6804	833.428	1.78031	0.798026	1076.44	10.0234	86.7943	4.93012	27.2838	100.994	34.344	201.895
5MEN_W_3	Male	Sukhbaatar	Rural	Winter	3	32	Friday	February	1.29587	123.47	15.6098	15.4067	408.241	1.26312	0.697701	473.25	4.6117	36.3438	7.71634	8.47035	258.574	11.76	121.623
6MEN_S_1	Male	Sukhbaatar	Rural	Summer	1	42	Thursday	August	0.710438	32.6767	7.8521	9.7994	102.485	0.980721	0.488435	146.558	2.33769	10.8841	1.93352	9.43604	160.624	16.2	125.482
6MEN_S_2	Male	Sukhbaatar	Rural	Summer	2	42	Friday	August	0.710438	37.3003	7.81343	9.02711	448.548	1.83939	0.556897	456.908	4.41525	52.4057	2.07929	9.86112	135.054	23.55	495.079
6MEN_S_3	Male	Sukhbaatar	Rural	Summer	3	42	Saturday	August	0.710438	116.67	18.7428	28.5323	3356.02	3.96989	1.30508	3359.54	38.9893	45.9164	3.05383	16.6972	122.036	0	430.994
6MEN_W_1	Male	Sukhbaatar	Rural	Winter	1	43	Wedesday	February	0.659437	54.3979	20.6596	18.81	159.132	1.82974	0.663763	227.454	10.6971	23.915	3.9734	18.301	331.927	0	297.637
6MEN_W_2	Male	Sukhbaatar	Rural	Winter	2	43	Thursday	February	0.659437	83.3903	35.0637	33.6199	251.946	2.74844	1.00568	325.057	22.585	27.8884	10.5237	39.3023	400.213	10.192	331.301
6MEN_W_3	Male	Sukhbaatar	Rural	Winter	3	43	Friday	February	0.659437	61.054	23.2723	20.72	159.593	1.94377	0.639172	242.238	12.3457	25.6434	7.42789	17.4137	391.423	10.472	364.331
7MEN_S_1	Male	Sukhbaatar	Rural	Summer	1	29	Thursday	August	1.35731	33.7023	12.2765	11.6172	120.64	1.37663	0.468439	187.146	6.01267	16.8026	6.21473	10.6159	229.479	11.228	282.374
7MEN_S_2	Male	Sukhbaatar	Rural	Summer	2	29	Friday	August	1.35731	80.8657	18.2446	21.4339	1230.95	2.31829	0.800573	1331.05	26.9415	16.4616	4.48274	14.9546	142.865	17.404	229.89
7MEN_S_3	Male	Sukhbaatar	Rural	Summer	3	29	Saturday	August	1.35731	52.6664	7.93422	9.77144	165.767	1.4983	0.603492	233.106	2.77109	15.3292	5.17584	11.7255	184.818	7.14	149.661
7MEN_W_1	Male	Sukhbaatar	Rural	Winter	1	29	Wedesday	February	1.29587	102.401	23.1814	20.2369	206.988	1.66628	0.754556	338.98	10.4397	21.205	7.18604	15.1041	328.335	5.04	195.532
7MEN_W_2	Male	Sukhbaatar	Rural	Winter	2	29	Thursday	February	1.29587	99.9153	20.8008	35.9118	46.5281	1.65305	0.568835	100.932	17.0962	24.6653	6.61136	34.0343	195.253	11.788	108.319
7MEN_W_3	Male	Sukhbaatar	Rural	Winter	3	29	Friday	February	1.29587	58.6897	20.3657	18.3249	201.536	1.28241	0.647041	251.855	9.71926	21.8238	4.91646	13.3338	325.462	3.78	129.976
8MEN_S_1	Male	Sukhbaatar	Rural	Summer	1	38	Wedesday	August	0.710438	146.24	26.3931	25.4662	262.987	1.89941	1.47905	378.19	8.63667	27.6387	9.80271	15.6989	493.11	15.736	91.1137
8MEN_S_2	Male	Sukhbaatar	Rural	Summer	2	38	Thursday	August	0.710438	64.1335	27.0881	25.3165	77.5799	1.68965	0.77396	173.072	12.4117	10.6225	5.83378	15.2027	313.35	18.196	171.039
8MEN_S_3	Male	Sukhbaatar	Rural	Summer	3	38	Friday	August	0.710438	139.711	28.2298	27.6089	325.667	2.64482	2.09246	372.875	9.7552	14.1592	6.61243	11.3284	439.488	10.528	227.698
8MEN_W_1	Male	Sukhbaatar	Rural	Winter	1	38	Wedesday	February	0.659437	244.164	50.9705	59.6021	6813.41	6.9265	1.68281	6925.5	111.224	189.55	12.2064	35.8567	379.499	18.012	80.8839
8MEN_W_2	Male	Sukhbaatar	Rural	Winter	2	38	Thursday	February	0.659437	79.7936	29.3756	23.6689	0	1.22001	0.625519	57.9347	14.3219	2.64156	7.26183	18.237	468.1	8.26	0
8MEN_W_3	Male	Sukhbaatar	Rural	Winter	3	38	Friday	February	0.659437	160.489	37.6913	41.4383	4199.95	4.41092	0.99742	4219.01	84.1372	2.81893	3.96528	23.6552	132.239	0	0
9MEN_S_1	Male	Sukhbaatar	Rural	Summer	1	41	Thursday	August	0.710438	77.4263	37.6787	31.2223	609.494	3.65935	1.3755	642.253	19.4826	69.9571	6.09299	22.2621	505.339	0	736.978
9MEN_S_2	Male	Sukhbaatar	Rural	Summer	2	41	Friday	August	0.710438	38.6733	13.8263	12.5808	190.632	1.80786	0.535795	256.699	7.85489	27.0268	4.56199	11.5298	214.939	5.768	409.434
9MEN_S_3	Male	Sukhbaatar	Rural	Summer	3	41	Saturday	August	0.710438	136.575	19.3784	24.5259	98.5013	1.69394	0.771931	130.529	9.13326	24.7821	3.56087	23.244	411.886	83	172.304
9MEN_W_1	Male	Sukhbaatar	Rural	Winter	1	41	Wedesday	February	0.659437	68.9866	28.4562	25.857	271.347	3.07857	1.08656	306.982	16.7742	36.8	7.51703	28.0301	379.497	7.784	618.193
9MEN_W_2	Male	Sukhbaatar	Rural	Winter	2	41	Thursday	February	0.659437	158.032	20.7351	29.5167	1511.2	3.56732	1.01385	1541.44	26.1953	37.0231	4.93839	14.8309	160.539	6.636	532.608
9MEN_W_3	Male	Sukhbaatar	Rural	Winter	3	41	Friday	February	0.659437	52.1747	9.80619	13.3203	363.53	2.42563	0.531466	385.673	7.418	44.549	2.08262	12.5461	36.3887	0	654.15
10FCN_S_1	Female	Tuv	Rural	Summer	1	42	Monday	August	0.51753	101.504	14.6942	22.0853	179.52	1.76625	1.09218	253.29	7.53094	34.1118	2.87922	19.1115	249.08	0	248.368
10FCN_S_2	Female	Tuv	Rural	Summer	2	42	Tuesday	August	0.646912	53.9519	8.58701	10.4275	1076.24	1.42063	0.457236	1101.57	11.0433	24.5626	3.27657	6.46021	109.131	4.984	232.493
10FCN_S_3	Female	Tuv	Rural	Summer	3	42	Wedesday	August	0.646912	105.434	24.2987	26.3109	1818.15	2.95794	0.946694	1907.03	32.8946	26.5568	0	18.6526	352.479	15.092	268.142
10FCN_W_1	Female	Tuv	Rural	Winter	1	42	Sunday	January	0.463221	41.586	19.4074	17.409	20.8562	1.03909	0.50343	39.7514	9.15116	6.01708	2.90568	13.2305	305.216	0	45.4487
10FCN_W_2	Female	Tuv	Rural	Winter	2	42	Monday	January	0.463221	126.167	9.01236	8.99748	147.312	1.056	0.58903	147.513	2.75759	11.6799	4.10805	8.59883	197.391	12.232	148.893
10FCN_W_3	Female	Tuv	Rural	Winter	3	42	Tuesday	January	0.579026	136.521	11.0547	13.7859	45.852	0.891589	0.466566	46.1419	5.23221	12.7355	3.69675	13.1618	238.31	10.56	88.7211
1FCN_S_1	Female	Tuv	Rural	Summer	1	39	Monday	August	0.51753	88.6912	10.8256	16.2521	331.809	1.115	0.863371	384.841	4.88842	36.1572	2.12636	14.0037	43.4821	11.064	60.4276
1FCN_S_2	Female	Tuv	Rural	Summer	2	39	Tuesday	August	0.646912	245.618	25.6663	33.1592	681.922	3.45209	2.88812	707.555	14.4012	279.159	5.80496	19.9239	279.728	16.14	74.6384
1FCN_S_3	Female	Tuv	Rural	Summer	3	39	Wedesday	August	0.646912	108.605	11.6628	13.3954	271.974	1.61187	0.739532	324.443	4.31506	81.8809	5.92669	12.0746	285.088	12.726	89.5266
1FCN_W_1	Female	Tuv	Rural	Winter	1	39	Thursday	January	0.579026	43.8263	12.3028	16.5943	21.9227	1.19988	0.624994	49.8842	3.66119	4.3845	2.62718	16.3474	284.437	0	46.985
1FCN_W_2	Female	Tuv	Rural	Winter	2	39	Friday	January	0.579026	47.4721	17.8157	15.5732	8.9476	0.937464	0.652679	36.9028	6.42976	2.07127	2.35727	10.2456	301.538	39.45	17.0273
1FCN_W_3	Female	Tuv	Rural	Winter	3	39	Saturday	January	0.579026	80.7787	17.4113	15.0368	31.5204	0.984289	0.522575	179.133	8.39282	4.85691	3.30821	12.9304	266.607	59.1	74.5103
2FCN_S_1	Female	Tuv	Rural	Summer	1	55	Monday	August	0.496094	158.103	12.9717	14.8156	1125.16	1.82328	0.947918	1174.22	16.4302	21.9346	4.56612	12.1508	176.954	10.12	133.786
2FCN_S_2	Female	Tuv	Rural	Summer	2	55	Tuesday	August	0.620118	80.2265	6.05347	5.44718	201.65	0.816347	0.540506	224.29	1.66759	19.0599	2.75306	4.57771	110.497	6.424	144.361
2FCN_S_3	Female	Tuv	Rural	Summer	3	55	Wedesday	August	0.620118	43.7293	6.52184	6.84074	295.028	0.852167	0.696154	333.571	1.96638	27.2357	2.38786	5.8941	108.054	0	111.894
2FCN_W_1	Female	Tuv	Rural	Winter	1	55	Thursday	January	0.579176	113.602	50.1723	50.1331	132.176	2.65899	1.29607	163.256	24.4278	16.9323	7.78261	33.4447	262.395	11.64	161.311
2FCN_W_2	Female	Tuv	Rural	Winter	2	55	Friday	January	0.579176	127.86	13.9636	11.2629	156.283	1.25137	0.635613	210.599	6.32858	15.1416	7.48511	10.6725	264.201	19.332	221.227
2FCN_W_3	Female	Tuv	Rural	Winter	3	55	Saturday	January	0.579176	41.2763	6.07741	9.2072	285.311	0.706002	0.27414	318.52	3.87213	27.6016	2.40914	9.92222	115.733	0	92.9459
3FCN_S_1	Female	Tuv	Rural	Summer	1	44	Monday	August	0.51753	48.0502	7.72228	10.975	258.696	1.17667	0.380504	311.011	4.87434	30.2668	5.2122	11.881	170.419	8.12	240.302
3FCN_S_2	Female	Tuv	Rural	Summer	2	44	Tuesday	August	0.646912	67.6145	7.24084	9.35258	175.127	0.886327	0.914331	229.199	3.76123	39.4077	4.46764	10.3951	144.053	6.44	146.588
3FCN_S_3	Female	Tuv	Rural	Summer	3	44	Wedesday	August	0.646912	40.3717	5.41932	12.26	120.871	0.768096	0.249471	141.469	5.44492	18.91	1.13973	12.7782	31.4784	0	126.488
3FCN_W_1	Female	Tuv	Rural	Winter	1	44	Sunday	January	0.463221	19.0557	13.4568	11.5989	24.202	0.687135	0.301332	32.3607	6.62719	4.22678	1.86812	7.559	128.578	1.148	56.7149
3FCN_W_2	Female	Tuv	Rural	Winter	2	44	Monday	January	0.463221	12.1939	1.18074	1.33859	143.705	0.263882	0.179173	151.089	0.322638	12.2208	0.813196	1.0145	21.2517	0	43.7844
3FCN_W_3	Female	Tuv	Rural	Winter	3	44	Tuesday	January	0.579026	37.617	4.0472	2.7364	0	0.25688	0.06024	0	1.64539	0	0.70942	4.4194	113	0	0
4FCN_S_1	Female	Tuv	Rural	Summer	1	29	Monday	August	0.88195	56.0478	8.73614	11.9131	295.437	1.29045	0.850776	334.707	2.1918	25.0995	2.21806	8.85598	124.829	1.232	114.454
4FCN_S_2	Female	Tuv	Rural	Summer	2	29	Tuesday	August	1.10244	111.11	16.9676	22.7067	1715.87	2.51689	1.18331	1754.9	26.4557	12.1273	2.67884	13.9034	144.415	0	78.6071
4FCN_S_3	Female	Tuv	Rural	Summer	3	29	Wedesday	August	1.10244	128.43	20.2447	39.7639	115.286	2.05566	0.8632	127.406	16.3193	36.3596	3.02374	39.3007	279.374	0	145.966
4FCN_W_1	Female	Tuv	Rural	Winter	1	29	Sunday	January	0.958557	169.782	12.5968	12.5412	82.0478	1.26429	0.739697	123.627	6.20216	10.393	5.40151	15.4845	154.059	15.84	177.954
4FCN_W_2	Female	Tuv	Rural	Winter	2	29	Monday	January	0.958557	218.766	18.122	13.1156	56.061	1.18629	0.735318	56.3758	6.46706	7.86543	5.30423	8.10208	301.137	17.336	118.551
4FCN_W_3	Female	Tuv	Rural	Winter	3	29	Tuesday	January	1.1982	87.8166	13.7909	11.7237	236.193	2.17473	0.653942	321.856	7.84206	33.2603	8.1012	18.3911	293.633	13.656	516.579
5FCN_S_1	Female	Tuv	Rural	Summer	1	42	Monday	August	0.51753	196.536	9.9006	11.279	196.215	1.9113	1.54106	297.902	2.03253	30.856	2.91708	7.66186	176.407	0	257.714
5FCN_S_2	Female	Tuv	Rural	Summer	2	42	Tuesday	August	0.646912	199.803	22.9533	33.5505	3110.59	4.53917	1.96255	3156.6	44.1982	50.691	4.74629	21.1851	156.502	0	401.613
5FCN_S_3	Female	Tuv	Rural	Summer	3	42	Wedesday	August	0.646912	102.589	14.2866	24.2991	187.826	2.67541	1.39206	189.421	4.77642	23.2591	3.20168	18.4659	215.973	0	201.255
5FCN_W_1	Female	Tuv	Rural	Winter	1	42	Sunday	January	0.463221	35.907	3.65196	2.99136	60.5896	0.563218	0.20792	88.8885	1.9324	8.24343	1.06649	2.50262	53.2939	2.024	141.595
5FCN_W_2	Female	Tuv	Rural	Winter	2	42	Monday	January	0.463221	49.6836	4.70104	5.49237	56.973	0.707119	0.188837	95.6473	2.81816	7.61771	1.33551	6.87238	76.998	0	127.897
5FCN_W_3	Female	Tuv	Rural	Winter	3	42	Tuesday	January	0.579026	177.561	17.6392	14.9503	1.17	1.19577	0.440244	36.6072	8.40356	1.96768	7.2703	22.4209	398.257	11.244	0
6FCN_S_1	Female	Tuv	Rural	Summer	1	29	Monday	August	0.88195	143.296	7.24399	7.61371	593.255	1.97119	0.886278	636.01	2.96678	55.3533	3.46792	9.2286	121.78	0	298.691
6FCN_S_2	Female	Tuv	Rural	Summer	2	29	Tuesday	August	1.10244	77.8343	10.9167	13.4631	1487.96	1.87894	0.98641	1506.21	19.6108	31.5404	2.73204	8.54201	103.363	0	129.177
6FCN_S_3	Female	Tuv	Rural	Summer	3	29	Wedesday	August	1.10244	156.772	11.8568	9.16333	669.772	0.944201	0.61347	734.57	4.00339	60.9384	9.02623	10.4394	253.048	19.788	101.524
6FCN_W_1	Female	Tuv	Rural	Winter	1	29	Monday	January	0.958557	50.386	2.70341	3.00687	127.83	0.394012	0.211723	138.065	0.930006	15.8016	1.96323	2.62336	59.552	4.824	63.647
6FCN_W_2	Female	Tuv	Rural	Winter	2	29	Tuesday	January	1.1982	205.743	12.47	11.3689	74.3592	1.02646	0.761544	75.0065	4.24759	24.8011	5.52757	9.56464	253.979	19.4	73.1507
7FCN_S_1	Female	Tuv	Rural	Summer	1	26	Monday	August	0.88195	337.059	16.4102	26.2146	353.107	2.00281	1.40788	485.712	3.36838	36.1385	16.7847	16.6944	307.132	39.6	115.99
7FCN_S_2	Female	Tuv	Rural	Summer	2	26	Tuesday	August	1.10244	85.689	10.8203	13.6136	402.35	1.80197	1.18969	1934.89	4.53914	34.1198	5.9359	13.9454	23.4475	18.408	114.582
7FCN_S_3	Female	Tuv	Rural	Summer	3	26	Wedesday	August	1.10244	71.1043	7.32613	13.0355	336.317	1.58096	0.453478	409.612	6.52346	26.7559	2.45113	15.8445	71.4471	5.64	183.587
7FCN_W_1	Female	Tuv	Rural	Winter	1	26	Sunday	January	0.958557	31.3547	8.43478	12.5753	31.0942	0.952492	0.406598	68.4534	5.28824	4.64324	2.26114	15.6914	150.072	0	73.7285
7FCN_W_2	Female	Tuv	Rural	Winter	2	26	Monday	January	0.958557	212.358	51.6902	44.0285	357.317	4.21954	1.5032	407.755	22.8585	15.0883	21.748	30.1399	224.028	17.552	168.608
7FCN_W_3	Female	Tuv	Rural	Winter	3	26	Tuesday	January	1.1982	37.2581	16.5066	11.954	48.5263	0.89569	0.390379	136.996	7.18404	7.23241	9.48126	8.2228	326.982	19.74	114.71
8FCN_S_1	Female	Tuv	Rural	Summer	1	25	Monday	August	0.88195	139.648	7.12553	12.7513	121.934	1.17424	0.581785	203.573	4.7221	14.0548	1.58092	12.7497	209.345	0	155.841
8FCN_S_2	Female	Tuv	Rural	Summer	2	25	Tuesday	August	1.10244	43.0936	7.45316	8.55218	253.202	0.832862	0.559232	285.569	2.60033	15.2748	3.61239	7.19162	160.365	4.48	59.1474
8FCN_S_3	Female	Tuv	Rural	Summer	3	25	Wedesday	August	1.10244	31.61	5.7126	7.17657	187.405	0.762071	0.560624	210.917	1.48271	16.3059	2.34817	5.0917	121.564	2.912	84.2402
8FCN_W_1	Female	Tuv	Rural	Winter	1	25	Thursday	January	1.1982	200.313	13.3646	15.1625	449.778	1.23823	0.749107	457.973	7.09959	33.2827	6.08	14.4704	279.933	16.72	138.011
8FCN_W_2	Female	Tuv	Rural	Winter	2	25	Friday	January	1.1982	120.624	17.5878	19.608	728.553	2.1302	1.51836	775.683	7.71279	59.9309	5.55148	17.2261	258.613	3.608	261.17
8FCN_W_3	Female	Tuv	Rural	Winter	3	25	Saturday	January	1.1982	214.756	22.0592	24.5489	240.777	2.02092	1.98152	287.878	4.77731	19.4056	7.39359	12.7113	462.086	18.376	149.149
9FCN_S_1	Female	Tuv	Rural	Summer	1	34	Monday	August	0.51753	125.759	5.97649	10.7145	206.13	0.97065	0.539068	288.36	3.48757	20.4633	2.20872	8.92885	169.566	0	147.996
9FCN_S_2	Female	Tuv	Rural	Summer	2	34	Tuesday	August	0.646912	114.562	15.917	23.1338	296.223	1.75863	0.653755	389.273	12.5902	31.1125	10.253	27.3036	325.939	19.656	217.156
9FCN_S_3	Female	Tuv	Rural	Summer	3	34	Wedesday	August	0.646912	20.6364	1.6198	2.45029	356.387	0.534099	0.227228	369.319	2.20618	26.0644	1.57413	4.00882	0.773691	0	101.908
9FCN_W_1	Female	Tuv	Rural	Winter	1	34	Thursday	January	0.579026	69.786	24.8762	24.1219	884.359	2.11967	0.769592	895.968	18.4923	54.5603	5.46459	21.9308	297.582	0	286.954
9FCN_W_2	Female	Tuv	Rural	Winter	2	34	Friday	January	0.579026	47.0582	18.3447	15.682	210.846	1.31618	0.587982	251.141	10.1248	22.6892	3.22027	11.6036	223.203	0	184.099
9FCN_W_3	Female	Tuv	Rural	Winter	3	34	Saturday	January	0.579026	24.0886	26.2962	25.6446	136.249	1.56908	0.689625	143.236	13.5569	11.46	2.12553	15.9348	18.8113	0	159.263
10MCN_S_1	Male	Tuv	Rural	Summer	1	44	Monday	August	0.56835	108.539	13.0373	9.48729	247.876	1.71142	0.471025	296.422	6.55707	114.095	7.23262	14.8446	272.973	34.69	156.83
10MCN_S_2	Male	Tuv	Rural	Summer	2	44	Tuesday	August	0.710438	79.1345	7.46728	6.53773	101.386	1.01305	0.410035	144.21	3.56534	13.1968	2.97443	8.6744	133.31	6.512	224.528
10MCN_S_3	Male	Tuv	Rural	Summer	3	44	Wedesday	August	0.710438	128.705	15.2339	14.4128	1652.87	2.06763	1.79677	1731.22	3.15178	184.656	8.74777	11.0528	346.304	0	153.467
10MCN_W_1	Male	Tuv	Rural	Winter	1	44	Thursday	January	0.659437	191.82	27.0121	26.6742	76.4983	1.75416	0.964737	100.593	13.2291	16.2893	6.24534	20.4581	415.885	14.872	168.968
10MCN_W_2	Male	Tuv	Rural	Winter	2	44	Friday	January	0.659437	929.743	56.2906	47.914	107.735	3.24154	3.15838	132.834	16.0614	18.9869	23.6039	29.6092	981.582	95.04	178.082
10MCN_W_3	Male	Tuv	Rural	Winter	3	44	Saturday	January	0.659437	667.498	29.7103	31.7926	61.4503	1.99452	2.10675	95.8355	8.06703	14.944	15.597	22.2898	502.317	67.936	90.5134
1MCN_S_1	Male	Tuv	Rural	Summer	1	40	Monday	August	0.56835	101.054	11.4868	13.0196	66.2054	1.32631	1.47512	145.359	3.19527	30.1575	1.55575	11.2271	85.4497	11.24	155.934
1MCN_S_2	Male	Tuv	Rural	Summer	2	40	Tuesday	August	0.710438	118.96	13.4041	20.6487	142.294	1.54482	1.99743	171.937	8.31679	74.9917	5.64447	15.727	152.629	6.192	110.741
1MCN_S_3	Male	Tuv	Rural	Summer	3	40	Wedesday	August	0.710438	123.004	13.5223	15.7436	265.615	1.39163	1.35446	346.916	4.69882	39.7727	7.83924	15.2344	319.306	14.792	124.769
1MCN_W_1	Male	Tuv	Rural	Winter	1	40	Thursday	January	0.659437	183.8	14.9193	20.9984	281.617	1.10654	0.552999	321.172	7.83534	31.7814	4.8662	20.6863	309.15	6.16	0
1MCN_W_2	Male	Tuv	Rural	Winter	2	40	Friday	January	0.659437	276.905	16.6067	11.3366	8.31	0.804244	0.829298	52.4773	3.60505	0.382619	9.9117	5.72469	343.296	34.232	0
1MCN_W_3	Male	Tuv	Rural	Winter	3	40	Saturday	January	0.659437	100.801	6.31875	4.96385	16.011	0.385089	0.329586	52.9064	1.86429	1.79791	1.95859	2.75536	184.033	14.744	25.0928
2MCN_S_1	Male	Tuv	Rural	Summer	1	49	Monday	August	0.428658	120.594	14.1395	19.7857	95.258	1.61598	1.59869	180.194	7.29751	52.8461	6.95786	21.3297	355.895	10.724	225.513
2MCN_S_2	Male	Tuv	Rural	Summer	2	49	Tuesday	August	0.535823	129.393	8.43752	9.65729	34.8417	0.841167	2.42748	75.0471	2.97991	72.703	3.77872	10.9961	93.4393	7.125	79.1517
2MCN_S_3	Male	Tuv	Rural	Summer	3	49	Wedesday	August	0.535823	68.8071	5.64606	7.26728	272.229	1.36763	1.27299	301.144	3.35706	59.0964	2.06255	9.29754	50.0774	0	383.662
2MCN_W_1	Male	Tuv	Rural	Winter	1	49	Sunday	January	0.447622	88.9251	19.2728	21.5288	1478.1	2.08745	1.16601	1594.63	8.65544	110.384	11.5438	18.3537	121.836	5.46	224.427
2MCN_W_2	Male	Tuv	Rural	Winter	2	49	Monday	January	0.447622	53.8575	8.14095	13.6465	38.6336	0.930867	0.548719	56.3499	3.77586	11.2168	1.41054	12.9186	139.022	0	85.4605
2MCN_W_3	Male	Tuv	Rural	Winter	3	49	Tuesday	January	0.559527	35.08	0.7734	0.7616	359.38	0.22484	0.1666	380.8	0	24.6863	2.00577	0.9876	1.428	0	0
3MCN_S_1	Male	Tuv	Rural	Summer	1	50	Monday	August	0.428658	96.0062	12.569	20.5014	310.056	2.10732	1.23553	365.964	8.26171	46.0386	2.81666	21.2289	138.548	0	390.127
3MCN_S_2	Male	Tuv	Rural	Summer	2	50	Tuesday	August	0.535823	121.083	24.2408	32.7927	448.769	2.84833	1.76638	594.869	9.23608	42.726	14.9951	30.0111	549.231	25.2	292.664
3MCN_S_3	Male	Tuv	Rural	Summer	3	50	Wedesday	August	0.535823	142.118	23.6635	26.576	246.32	2.59802	1.72958	364.412	8.88681	40.3522	14.2783	29.6897	578.02	26.34	295.097
3MCN_W_1	Male	Tuv	Rural	Winter	1	50	Sunday	January	0.447622	57.1868	15.7466	11.6998	111.134	1.39596	0.501916	195.383	7.62457	15.6978	7.54928	8.95787	284.974	14.224	262.707
3MCN_W_2	Male	Tuv	Rural	Winter	2	50	Monday	January	0.447622	66.1272	6.98588	8.84825	58.6596	0.90952	0.338311	111.182	4.01369	15.5976	1.77876	9.00751	111.613	0	112.79
3MCN_W_3	Male	Tuv	Rural	Winter	3	50	Tuesday	January	0.559527	98.137	25.2168	20.0117	57.803	1.28049	0.590788	127.834	11.4581	12.2486	8.91215	12.2291	430.51	15.176	58.8913
4MCN_S_1	Male	Tuv	Rural	Summer	1	42	Monday	August	0.56835	73.2821	11.0163	18.8752	163.051	1.38945	0.609904	217.561	7.51255	28.1624	2.20632	18.0824	157.35	0	206.248
4MCN_S_2	Male	Tuv	Rural	Summer	2	42	Tuesday	August	0.710438	177.772	23.5238	34.7289	1853.72	2.27995	1.7133	1911.84	20.9251	45.9648	7.57724	17.7939	251.637	12.376	139.163
4MCN_S_3	Male	Tuv	Rural	Summer	3	42	Wedesday	August	0.710438	106.143	9.9976	16.6508	1744.35	1.84343	0.885503	1778.2	17.8089	38.0415	1.9249	12.0915	76.1236	0	204.583
4MCN_W_1	Male	Tuv	Rural	Winter	1	42	Thursday	January	0.659437	83.6449	8.98235	14.9525	84.56	0.671589	0.245352	103.122	6.02127	15.6353	1.85478	15.2549	183.117	0	0
4MCN_W_2	Male	Tuv	Rural	Winter	2	42	Friday	January	0.659437	370.945	29.0221	25.7799	530.421	1.69178	1.31613	675.934	11.2244	34.5085	16.219	19.4892	564.226	40.836	25.4769
4MCN_W_3	Male	Tuv	Rural	Winter	3	42	Saturday	January	0.659437	160.001	10.8444	8.51249	39.1642	0.683616	0.595056	99.1371	3.18437	4.59242	3.59532	4.74876	312.277	25.744	70.4136
5MCN_S_1	Male	Tuv	Rural	Summer	1	57	Monday	August	0.428658	238.207	13.7726	16.3182	139.896	1.8319	3.81604	300.737	1.75054	94.8492	4.63892	10.7333	200.398	2.376	158.048
5MCN_S_2	Male	Tuv	Rural	Summer	2	57	Tuesday	August	0.535823	182.571	12.6876	20.8848	79.9112	1.97043	2.92848	150.656	3.85526	72.2991	4.60821	18.9714	258.74	2.2	187.712
5MCN_S_3	Male	Tuv	Rural	Summer	3	57	Wedesday	August	0.535823	154.602	18.8506	35.2056	44.8991	2.54493	2.15849	48.9759	6.75797	38.0168	5.09545	31.079	270.148	0	106.444
5MCN_W_1	Male	Tuv	Rural	Winter	1	57	Thursday	January	0.559527	62.7039	18.9838	20.4024	1097.3	1.98523	0.772689	1159.97	13.7864	81.828	5.47992	18.5046	114.675	0	307.643
5MCN_W_2	Male	Tuv	Rural	Winter	2	57	Friday	January	0.559527	38.0715	12.5725	8.20083	745.162	1.23644	0.486498	815.844	4.91591	66.9943	4.20014	7.60023	104.191	0	233.133
5MCN_W_3	Male	Tuv	Rural	Winter	3	57	Saturday	January	0.559527	77.6672	23.9954	19.4488	732.872	1.53429	0.982635	861.012	9.19439	66.0242	11.5322	11.5085	414.816	16.548	155.038
6MCN_S_1	Male	Tuv	Rural	Summer	1	34	Monday	August	0.56835	271.658	15.648	19.5759	2.89	1.17031	3.71726	38.0269	5.6915	101.042	4.82103	19.8536	158.824	7.656	0
6MCN_S_2	Male	Tuv	Rural	Summer	2	34	Tuesday	August	0.710438	334.959	23.1291	28.3567	1691.87	2.66095	4.89641	1692.1	28.7964	131.204	6.90505	18.3263	147.405	1.848	66.0607
6MCN_S_3	Male	Tuv	Rural	Summer	3	34	Wedesday	August	0.710438	324.994	12.056	17.5899	362.614	1.53108	5.13647	377.671	6.40758	141.1	4.20001	10.6485	56.5839	3.36	0
6MCN_W_1	Male	Tuv	Rural	Winter	1	34	Sunday	January	0.52755	182.115	24.5106	34.8531	287.788	3.93625	1.52338	423.276	15.6254	39.5409	7.40202	43.7631	254.813	32.536	671.048
6MCN_W_2	Male	Tuv	Rural	Winter	2	34	Monday	January	0.52755	189.256	17.0981	21.8573	192.309	2.37836	0.795835	286.787	7.90758	26.078	9.47423	11.5082	309.531	25.38	449.879
6MCN_W_3	Male	Tuv	Rural	Winter	3	34	Tuesday	January	0.659437	129.769	19.9156	34.6508	123.473	2.22755	1.89354	144.175	10.4256	51.8178	5.35089	25.7834	156.117	3.024	282.678
7MCN_S_1	Male	Tuv	Rural	Summer	1	55	Monday	August	0.428658	226.942	10.5281	9.92556	582.754	1.25327	2.76066	584.654	9.65588	73.197	4.28483	8.33232	86.0467	11.616	54.0264
7MCN_S_2	Male	Tuv	Rural	Summer	2	55	Tuesday	August	0.535823	211.49	17.9222	19.2692	32.8664	1.50598	2.96766	42.0266	6.87124	77.1556	4.38603	18.9441	229.204	53.716	71.0537
7MCN_S_3	Male	Tuv	Rural	Summer	3	55	Wedesday	August	0.535823	121.289	10.9638	14.1019	56.6554	1.31769	1.44375	76.7491	3.24987	31.6631	3.42442	14.484	160.362	36.838	128.537
8MCN_S_1	Male	Tuv	Rural	Summer	1	49	Monday	August	0.428658	57.2078	6.92898	8.85336	145.711	1.36785	0.308017	187.254	4.34092	13.5451	4.618	12.0787	153.537	9.268	164.62
8MCN_S_2	Male	Tuv	Rural	Summer	2	49	Tuesday	August	0.535823	123.086	15.8749	24.7267	344.046	1.99459	1.68159	456.267	4.34665	64.5753	2.32494	16.582	187.58	16.032	168.352
8MCN_S_3	Male	Tuv	Rural	Summer	3	49	Wedesday	August	0.535823	101.711	11.649	14.52	501.975	1.23718	0.798612	583.525	4.2906	45.9092	8.46831	12.3342	274.843	12.908	105.492
9MCN_S_1	Male	Tuv	Rural	Summer	1	26	Monday	August	1.08585	170.722	16.6576	22.2636	109.475	1.82306	0.834236	225.922	8.95389	26.6361	12.3397	24.476	430.39	25.984	97.4228
9MCN_S_2	Male	Tuv	Rural	Summer	2	26	Tuesday	August	1.35731	401.179	39.5765	44.6665	355.019	3.04403	2.97484	459.912	18.4155	61.8003	9.91511	38.972	234.348	35.496	113.686
9MCN_S_3	Male	Tuv	Rural	Summer	3	26	Wedesday	August	1.35731	175.677	15.2485	18.6407	990.52	1.87984	1.79372	1058.97	7.03063	100.636	8.57579	18.342	270.585	6.076	176.034
9MCN_W_1	Male	Tuv	Rural	Winter	1	26	Sunday	January	1.0367	195.196	41.7728	32.5848	36.9146	1.84971	1.15677	37.7207	18.0556	7.30736	7.61598	19.7912	569.284	15.664	74.6384
9MCN_W_2	Male	Tuv	Rural	Winter	2	26	Monday	January	1.0367	201.135	16.2462	13.4297	164.808	1.06294	0.841165	164.817	5.57003	9.59001	5.47921	7.5807	156.674	21.208	101.139
9MCN_W_3	Male	Tuv	Rural	Winter	3	26	Tuesday	January	1.29587	206.662	24.3446	34.8839	45.9101	2.22074	1.22636	70.1004	9.89291	13.7052	7.21803	34.2257	470.524	13.992	79.1192
10FNGOW_W_1	Female	Bulgan	Urban	Winter	1	30	Friday	January	1.76348	204.491	28.5206	48.7071	662.776	2.96845	1.11166	748.561	20.3843	84.5857	7.60008	50.9459	427.19	0	337.475
10FNGOW_W_2	Female	Bulgan	Urban	Winter	2	30	Saturday	January	1.76348	101.349	11.4171	15.0493	456.367	1.84196	1.04145	548.946	4.46378	44.1295	4.77666	12.2479	169.222	1.484	282.806
10FNGOW_W_3	Female	Bulgan	Urban	Winter	3	30	Sunday	January	1.41079	37.333	4.06789	4.63265	478.601	0.663444	0.516542	510.688	1.18258	40.7998	3.07247	3.27893	38.0393	0	49.1627
11FNGOW_S_1	Female	Bulgan	Urban	Summer	1	52	Tuesday	August	1.04824	95.7151	11.0134	14.1096	43.0201	0.884173	0.357612	72.937	5.19599	12.1004	3.91348	13.6783	248.086	46.742	51.722
11FNGOW_S_2	Female	Bulgan	Urban	Summer	2	52	Wedesday	August	1.04824	70.9444	9.75203	13.8754	42.7379	2.65015	1.72778	77.5326	4.66271	16.0118	2.2466	12.1495	168.339	0	95.6344
11FNGOW_S_3	Female	Bulgan	Urban	Summer	3	52	Sunday	August	0.838589	26.9878	3.86898	6.38478	24.3086	0.360136	0.143528	52.588	2.66762	6.85962	0.713851	6.6354	72.2581	0	43.6012
12FNGOW_S_1	Female	Bulgan	Urban	Summer	1	42	Tuesday	August	1.2183	158.233	6.14426	7.63885	2.13	0.55586	0.49248	273.783	2.76966	0.0248459	2.80737	8.05702	46.1847	15.704	0
12FNGOW_S_2	Female	Bulgan	Urban	Summer	2	42	Wedesday	August	1.2183	275.62	10.0096	8.92861	64.642	1.07862	0.938822	171.606	2.79425	3.65446	6.0603	7.75699	163.853	21.648	0
12FNGOW_S_3	Female	Bulgan	Urban	Summer	3	42	Sunday	August	0.974643	177.377	19.4473	20.9075	424.631	1.80622	2.08417	464.044	1.6577	38.4422	5.38614	7.84954	398.564	6.132	0
13FNGOW_S_1	Female	Bulgan	Urban	Summer	1	37	Tuesday	August	1.2183	142.616	18.9632	22.6076	225.818	1.629	0.715387	312.694	8.07014	48.5974	3.62798	23.0975	522.87	85.676	33.5425
13FNGOW_S_2	Female	Bulgan	Urban	Summer	2	37	Wedesday	August	1.2183	53.8729	6.88942	5.90894	301.129	0.704699	0.33748	339.803	2.46293	18.7857	2.33063	7.91327	84.3232	4.176	0
13FNGOW_S_3	Female	Bulgan	Urban	Summer	3	37	Sunday	August	0.974643	73.5167	6.44371	11.2095	341.363	1.51933	0.474768	451.091	5.66197	28.2289	1.83979	13.5382	177.072	17.64	156.446
1FNGOW_S_1	Female	Bulgan	Urban	Summer	1	47	Tuesday	August	1.04824	97.1179	5.66757	10.3242	344.815	0.718303	0.447886	518.803	4.40031	23.1546	3.07758	10.6533	5.90928	3.96	0
1FNGOW_S_2	Female	Bulgan	Urban	Summer	2	47	Wedesday	August	1.04824	111.157	12.0973	16.7835	2242.88	2.06021	0.492402	2294.66	29.8208	35.8265	6.39669	13.1096	123.503	7.084	72.7395
1FNGOW_S_3	Female	Bulgan	Urban	Summer	3	47	Sunday	August	0.838589	57.8978	6.40029	8.84671	220.052	0.900188	0.343562	271.625	3.02694	19.8553	2.19444	9.59513	209.826	0	89.3022
1FNGOW_W_1	Female	Bulgan	Urban	Winter	1	50	Friday	January	1.06765	58.2605	7.31553	9.10177	74	0.658199	0.200834	113.1	4.05016	49.5707	4.59198	9.75093	173.361	8.26	0
1FNGOW_W_2	Female	Bulgan	Urban	Winter	2	50	Saturday	January	1.06765	51.8649	4.01362	3.815	78.9857	0.489699	0.147946	100.971	2.28237	46.9994	1.93094	5.30818	52.378	0	2.07821
1FNGOW_W_3	Female	Bulgan	Urban	Winter	3	50	Sunday	January	0.854118	63.042	4.67696	4.79259	237.669	1.13571	0.329575	263.272	2.01361	53.392	3.62448	6.72602	127.75	0	34.9878
2FNGOW_S_1	Female	Bulgan	Urban	Summer	1	37	Tuesday	August	1.2183	51.3848	7.26045	8.21855	77.7656	0.550904	0.245999	157.099	3.97806	8.38407	2.15855	10.4772	125.173	33.3	30.3418
2FNGOW_S_2	Female	Bulgan	Urban	Summer	2	37	Wedesday	August	1.2183	78.0677	6.42625	8.06983	182.855	0.987704	0.185898	184.198	4.68616	107.664	1.97626	9.61222	113.179	0	33.4144
2FNGOW_S_3	Female	Bulgan	Urban	Summer	3	37	Sunday	August	0.974643	33.3379	1.8005	2.4395	161.351	0.308107	0.12248	181.262	0.922982	13.3791	1.10489	2.70973	23.827	0	46.8831
2FNGOW_W_1	Female	Bulgan	Urban	Winter	1	37	Friday	January	1.28518	218.121	16.9815	23.8589	26.9865	1.31313	0.655777	104.105	7.13217	10.2907	10.325	18.9766	412.123	25.18	53.1302
2FNGOW_W_2	Female	Bulgan	Urban	Winter	2	37	Saturday	January	1.28518	43.9514	6.62217	5.28021	77.6316	0.486751	0.198739	96.1145	3.06491	6.82463	3.21627	8.28514	108.592	0	44
2FNGOW_W_3	Female	Bulgan	Urban	Winter	3	37	Sunday	January	1.02814	117.923	9.66686	8.77297	56.6597	0.787992	0.453052	175.561	3.81547	8.76019	4.57895	10.3975	159.462	8.888	84.8057
3FNGOW_W_1	Female	Bulgan	Urban	Winter	1	47	Friday	January	1.06765	27.2332	5.03085	3.96883	390.651	0.968899	0.29524	443.212	2.36492	62.0755	7.13519	6.40554	104.843	5.404	260.746
3FNGOW_W_2	Female	Bulgan	Urban	Winter	2	47	Saturday	January	1.06765	118.742	16.8051	18.6745	471.544	2.14429	0.900385	595.099	9.64574	83.4898	5.2267	23.5663	168.072	0	222
3FNGOW_W_3	Female	Bulgan	Urban	Winter	3	47	Sunday	January	0.854118	104.571	12.5933	12.7457	2.52	0.766675	0.505104	65.7181	6.55122	0.514835	7.31136	17.2224	204.262	16.408	0
4FNGOW_S_1	Female	Bulgan	Urban	Summer	1	47	Wedesday	August	1.04824	101.405	18.381	22.9697	94.4147	1.17061	0.389826	149.764	9.27584	21.2697	6.51245	23.775	423.268	78.91	31.238
4FNGOW_S_2	Female	Bulgan	Urban	Summer	2	47	Thursday	August	1.04824	163.35	22.3987	56.0327	64.041	2.04976	0.81712	70.6844	23.8	39.6161	2.84524	54.7802	23.8279	0	0
4FNGOW_S_3	Female	Bulgan	Urban	Summer	3	47	Sunday	August	0.838589	203.993	13.7723	24.7192	195.45	1.66246	1.34	215.895	7.80716	31.2969	2.1938	18.2919	182.64	0	114.198
4FNGOW_W_1	Female	Bulgan	Urban	Winter	1	47	Friday	January	1.06765	106.823	9.72688	8.20189	279.88	1.01641	0.524045	358.109	3.86256	23.7358	6.73763	10.7287	282.573	19.976	153.58
4FNGOW_W_2	Female	Bulgan	Urban	Winter	2	47	Saturday	January	1.06765	151.687	10.3921	11.5016	41.7203	0.958018	0.656781	120.781	4.33592	7.82476	3.73989	8.73314	129.347	20.272	88.9771
4FNGOW_W_3	Female	Bulgan	Urban	Winter	3	47	Sunday	January	0.854118	377.78	30.3565	25.6153	109.011	2.34465	1.35912	248.243	10.8063	1.8675	11.9112	26.3967	737.446	40.192	0
5FNGOW_S_1	Female	Bulgan	Urban	Summer	1	52	Tuesday	August	1.04824	10.5	0.84	0.63	0	0.07	0.105	98	0	0	0.175	0.37	0	0	0
5FNGOW_S_2	Female	Bulgan	Urban	Summer	2	52	Wedesday	August	1.04824	14.9827	1.41237	2.58037	8.12382	0.157913	0.18003	15.2711	1.0335	6.22302	0.290436	2.74375	19.2404	0	19.2037
5FNGOW_S_3	Female	Bulgan	Urban	Summer	3	52	Sunday	August	0.838589	86.2343	3.98747	8.28732	76.4278	0.482615	0.438715	401.746	3.28069	10.2756	1.29616	7.5452	0.0368073	8.4	25.6049
5FNGOW_W_1	Female	Bulgan	Urban	Winter	1	49	Friday	January	1.06765	6.56914	1.72891	2.39806	0	0.149547	0.0907052	19.2072	1.32383	0	0.405816	3.25846	0.53142	0	0
5FNGOW_W_2	Female	Bulgan	Urban	Winter	2	49	Saturday	January	1.06765	18.6095	3.9134	4.8281	11.8	0.373189	0.244835	50.9957	2.52225	0.275229	1.17777	6.28364	1.01684	0	0
5FNGOW_W_3	Female	Bulgan	Urban	Winter	3	49	Sunday	January	0.854118	36.75	11.789	16.0965	0	0.9555	0.481	0	10.2837	0	2.56869	23.6955	25.9	0	0
6FNGOW_S_1	Female	Bulgan	Urban	Summer	1	56	Tuesday	August	1.04824	177.889	8.67407	10.4364	176.918	1.02397	0.599799	294.378	3.03095	19.1818	6.01811	8.27897	152.542	15.752	113.942
6FNGOW_S_2	Female	Bulgan	Urban	Summer	2	56	Wedesday	August	1.04824	80.3693	6.52993	9.66694	350.896	1.18305	0.405006	450.532	4.36007	72.0212	4.67594	9.46539	37.3057	0	105.236
6FNGOW_S_3	Female	Bulgan	Urban	Summer	3	56	Sunday	August	0.838589	146.715	7.5316	8.74613	140.523	0.933565	0.489969	290.7	2.63366	14.043	3.93502	6.79544	82.3496	5.036	93.9701
6FNGOW_W_1	Female	Bulgan	Urban	Winter	1	55	Friday	January	1.06765	127.061	6.72032	12.1845	499.338	1.28466	0.541928	750.758	5.57584	87.2274	3.8502	11.3105	112.269	0	125.295
6FNGOW_W_2	Female	Bulgan	Urban	Winter	2	55	Saturday	January	1.06765	20.9209	3.56083	4.02155	140.341	0.467103	0.197751	152.946	2.54273	10.1325	0.919213	5.02384	25.0454	0	35.321
6FNGOW_W_3	Female	Bulgan	Urban	Winter	3	55	Sunday	January	0.854118	62.8384	3.33698	5.09979	391.076	0.93362	0.33823	412.954	2.19576	71.5451	2.82112	5.13187	38.9287	1.584	127.088
7FNGOW_S_1	Female	Bulgan	Urban	Summer	1	47	Tuesday	August	1.04824	63.9237	7.96141	7.77392	245.195	1.51091	0.386307	308.772	4.12818	13.0843	6.36899	12.7038	197.066	10.584	95.8905
7FNGOW_S_2	Female	Bulgan	Urban	Summer	2	47	Wedesday	August	1.04824	30.2031	2.67519	4.45783	310.028	0.826061	0.265066	351.121	2.18535	19.1542	2.17922	6.59424	1.61216	0	52.7462
7FNGOW_S_3	Female	Bulgan	Urban	Summer	3	47	Sunday	August	0.838589	41.083	4.62617	6.03788	146.003	0.916956	0.39253	170.035	2.11791	11.085	1.17934	6.42008	79.2557	0	67.9811
7FNGOW_W_1	Female	Bulgan	Urban	Winter	1	37	Friday	January	1.28518	150.184	12.6813	16.4879	366.985	1.72139	1.14967	434.838	6.13754	24.5756	4.54147	14.1564	138.457	6.16	86.1908
7FNGOW_W_2	Female	Bulgan	Urban	Winter	2	37	Saturday	January	1.28518	109.357	9.60061	10.6442	331.71	1.15783	0.299497	349.797	5.39287	120.247	3.19313	12.2276	176.852	48	0
7FNGOW_W_3	Female	Bulgan	Urban	Winter	3	37	Sunday	January	1.02814	83.9074	6.29317	7.4564	1.98	0.362761	0.25408	34.8545	2.23349	3.3812	4.71119	6.15357	164.407	13.144	0
8FNGOW_S_1	Female	Bulgan	Urban	Summer	1	37	Tuesday	August	1.2183	31.2622	2.47026	6.42776	0	0.483232	0.351171	92.8636	1.59504	2.26878	1.17109	4.53866	12.8821	0	0
8FNGOW_S_2	Female	Bulgan	Urban	Summer	2	37	Wedesday	August	1.2183	0.3	0.039	2.40432	0	0.19185	0.069	0	0	0	0.57321	0.153522	0	0	0
8FNGOW_S_3	Female	Bulgan	Urban	Summer	3	37	Sunday	August	0.974643	4.40595	0.99117	2.55533	11.2935	0.306145	0.129825	18.128	0.429967	1.59798	0.534404	1.69291	50.0631	0	26.824
8FNGOW_W_1	Female	Bulgan	Urban	Winter	1	35	Friday	January	1.28518	245.525	11.6683	19.8766	6399.72	3.47942	0.672779	6486.18	49.7417	42.5447	3.79486	12.909	62.2079	9.513	180.899
8FNGOW_W_2	Female	Bulgan	Urban	Winter	2	35	Saturday	January	1.28518	18.4775	5.0001	4.07697	0	0.247432	0.118274	36.8897	2.17162	0.319574	4.10565	5.93466	136.347	8.232	0
8FNGOW_W_3	Female	Bulgan	Urban	Winter	3	35	Sunday	January	1.02814	59.3542	4.63306	7.04643	491.384	1.13987	0.558762	688.911	2.89674	33.7146	3.54203	9.92555	1.62563	8.7	33.5069
9FNGOW_W_1	Female	Bulgan	Urban	Winter	1	27	Friday	January	1.76348	41.1688	6.14022	4.80027	98.6099	0.464477	0.167598	133.198	3.05086	39.4971	1.33207	5.60588	158.427	8.656	2.39774
9FNGOW_W_2	Female	Bulgan	Urban	Winter	2	27	Saturday	January	1.76348	87.5761	7.3938	8.02006	332.873	1.15405	0.42933	481.486	4.05936	23.574	3.11077	12.3363	88.5804	30.675	51.2099
9FNGOW_W_3	Female	Bulgan	Urban	Winter	3	27	Sunday	January	1.41079	145.221	10.5089	20.4376	3282.38	2.43437	0.402571	3322.36	28.453	40.3511	2.57595	13.2913	48.3712	0	26.8852
10MNGOW_S_1	Male	Bulgan	Urban	Summer	1	27	Tuesday	August	0.90492	193.16	20.4935	21.8679	389.271	2.63548	0.741664	478.48	9.26534	217.009	12.3917	24.7516	466.192	65.04	94.5686
10MNGOW_S_2	Male	Bulgan	Urban	Summer	2	27	Wedesday	August	0.90492	74.5784	8.54333	13.2058	1.83674	0.673634	0.244548	46.7541	4.24169	5.95463	3.4707	12.3061	198.291	9.538	0
10MNGOW_S_3	Male	Bulgan	Urban	Summer	3	27	Sunday	August	0.723936	149.87	20.3657	30.5839	18.4719	1.28671	0.738257	86.7201	13.3279	21.4837	2.4787	25.0241	210.663	14.376	0
10MNGOW_W_1	Male	Bulgan	Urban	Winter	1	27	Friday	January	0.915606	145.431	22.8502	36.3568	214.024	1.88419	0.800558	329.91	16.1637	38.2425	9.91021	39.8577	364.006	14.42	104.07
10MNGOW_W_2	Male	Bulgan	Urban	Winter	2	27	Saturday	January	0.915606	66.0567	18.2902	25.1458	64.1953	1.70312	0.652808	161.126	16.4611	11.5039	4.46634	38.2268	86.468	0	113.535
10MNGOW_W_3	Male	Bulgan	Urban	Winter	3	27	Sunday	January	0.732485	211.81	28.6473	22.7412	135.357	2.10654	1.03942	151.034	13.4068	8.75026	7.39897	18.254	453.914	16.104	113.814
11MNGOW_S_1	Male	Bulgan	Urban	Summer	1	32	Tuesday	August	0.90492	160.743	13.2411	15.1746	88.1748	1.38021	1.01148	158.955	3.98267	52.27	2.24169	10.8992	302.858	7.776	0
11MNGOW_S_2	Male	Bulgan	Urban	Summer	2	32	Wedesday	August	0.90492	116.288	9.36185	11.8083	187.24	0.838314	0.501527	255.845	3.48287	18.2949	6.65578	10.2562	230.03	11.788	0
11MNGOW_S_3	Male	Bulgan	Urban	Summer	3	32	Sunday	August	0.723936	157.146	6.4069	2.59064	613.53	2.17053	0.359757	640.196	5.2537	302.992	4.52797	7.34876	38.0169	0	114.07
12MNGOW_S_1	Male	Bulgan	Urban	Summer	1	32	Tuesday	August	0.90492	92.1549	9.79443	13.2717	0.984683	0.65106	0.27416	116.445	4.9248	7.70428	6.3806	13.0391	246.18	13.44	2.99262
12MNGOW_S_2	Male	Bulgan	Urban	Summer	2	32	Wedesday	August	0.90492	61.1841	9.04533	12.2188	12.0958	0.599831	0.18338	37.3289	4.98861	8.9361	1.40058	12.6947	193.182	41.4	24.9648
12MNGOW_S_3	Male	Bulgan	Urban	Summer	3	32	Tuesday	August	0.90492	52.1881	3.98119	7.6236	200.83	0.402882	0.26091	291.113	2.70002	17.5524	1.47279	7.60977	0.798	12.072	0
13MNGOW_S_1	Male	Bulgan	Urban	Summer	1	27	Tuesday	August	0.90492	175.465	12.2063	21.3011	240.875	0.977407	0.5814	510.636	9.18849	24.745	3.1358	20.4574	108.304	17.222	0
13MNGOW_S_2	Male	Bulgan	Urban	Summer	2	27	Wedesday	August	0.90492	150.696	15.7069	26.0205	8.6057	1.17979	1.03456	186.809	9.29229	32.7888	2.85034	24.4542	397.208	7.425	0
13MNGOW_S_3	Male	Bulgan	Urban	Summer	3	27	Monday	August	0.723936	77.433	10.0267	9.72962	32.6552	0.800695	0.369547	129.245	3.92708	6.72071	7.10553	11.2478	228.077	12.12	77.4788
1MNGOW_S_1	Male	Bulgan	Urban	Summer	1	56	Tuesday	August	1.24649	75.77	11.9974	19.9254	328.655	1.96455	1.25993	459.546	12.6567	59.6277	4.17127	21.0035	66.5032	13.872	162.74
1MNGOW_S_2	Male	Bulgan	Urban	Summer	2	56	Wedesday	August	1.24649	91.0429	17.3271	18.0886	404.79	1.9902	1.61997	467.485	3.78845	36.7406	8.15929	11.6694	270.363	10.752	167.712
1MNGOW_S_3	Male	Bulgan	Urban	Summer	3	56	Thursday	August	1.24649	273.816	28.6624	39.0016	777.375	3.57218	2.08475	1115.98	12.9542	62.1088	6.06676	32.0391	363.357	85.41	107.413
1MNGOW_W_1	Male	Bulgan	Urban	Winter	1	58	Friday	January	1.33882	89.1893	14.3979	13.6679	932.496	3.34147	0.98512	1063.94	9.61717	88.1402	7.57715	22.7564	215.855	2.464	864.422
1MNGOW_W_2	Male	Bulgan	Urban	Winter	2	58	Saturday	January	1.33882	516.23	26.5813	23.2057	17.25	1.56142	1.69619	115.386	6.65085	1.21191	13.1869	19.9828	490.444	65.696	0
1MNGOW_W_3	Male	Bulgan	Urban	Winter	3	58	Sunday	January	1.07106	409	19.9364	18.1071	104.886	1.44211	1.29343	105.703	4.9101	19.8681	9.96237	13.15	440.514	41.096	132.931
2MNGOW_S_1	Male	Bulgan	Urban	Summer	1	32	Tuesday	August	0.90492	48.5911	5.85965	12.0469	1.18256	0.480409	0.287671	120.443	4.51728	6.40573	0.871054	11.8716	31.7325	15.6	0
2MNGOW_S_2	Male	Bulgan	Urban	Summer	2	32	Wedesday	August	0.90492	94.702	11.3329	12.1718	199.153	0.944575	0.406996	311.56	6.39113	59.0885	5.93763	14.5051	142.645	37.8	0
2MNGOW_S_3	Male	Bulgan	Urban	Summer	3	32	Sunday	August	0.723936	110.241	4.75648	5.49735	167.24	0.913955	0.314757	324.203	3.75901	99.4445	2.94684	7.736	5.75934	0	0
2MNGOW_W_1	Male	Bulgan	Urban	Winter	1	32	Tuesday	December	0.915606	28.2154	7.1813	5.90291	84.7714	0.535374	0.215175	139.821	3.28885	7.84211	6.12051	9.11433	190.398	11.48	57.6111
2MNGOW_W_2	Male	Bulgan	Urban	Winter	2	32	Wedesday	December	0.915606	74.3369	15.4592	14.8197	40.1825	1.11195	0.739054	123.033	6.23195	10.5584	11.4417	16.0488	320.149	20.67	68.6738
2MNGOW_W_3	Male	Bulgan	Urban	Winter	3	32	Thursday	December	0.915606	122.457	23.3392	29.8706	87.32	2.03139	0.754326	103.72	19.8914	53.9786	5.28723	46.624	56.7216	35.49	0
3MNGOW_S_1	Male	Bulgan	Urban	Summer	1	32	Tuesday	August	0.90492	68.5158	3.06493	4.23638	199.454	0.450282	0.168839	233.273	1.61767	16.68	1.58076	4.59254	46.2002	0	32.0062
3MNGOW_S_2	Male	Bulgan	Urban	Summer	2	32	Wedesday	August	0.90492	133.235	5.15634	9.52532	707.211	0.838284	0.576977	839.633	2.69675	52.9105	4.46451	8.96684	17.3347	9.744	0
3MNGOW_S_3	Male	Bulgan	Urban	Summer	3	32	Sunday	August	0.723936	94.2061	11.287	13.6611	489.019	1.34442	1.14865	542.447	2.32526	39.5946	5.74208	7.99752	234.131	6.076	117.271
3MNGOW_W_1	Male	Bulgan	Urban	Winter	1	32	Friday	January	0.915606	50.1869	8.48834	11.3042	57.6387	0.605914	0.372978	98.2325	4.82799	8.41496	4.21606	12.2591	143.409	6.944	0
3MNGOW_W_2	Male	Bulgan	Urban	Winter	2	32	Saturday	January	0.915606	91.9205	5.58472	10.6676	333.626	0.63637	0.371626	446.287	3.77865	28.2219	2.62301	10.6842	39.5791	11.352	0
3MNGOW_W_3	Male	Bulgan	Urban	Winter	3	32	Sunday	January	0.732485	114.341	20.8066	24.0957	12.9981	1.37617	0.525865	105.656	12.1369	10.2344	7.31442	31.2624	434.175	16.8	30.7259
4MNGOW_S_1	Male	Bulgan	Urban	Summer	1	52	Tuesday	August	1.24649	392.446	38.3326	42.979	723.6	4.05463	2.09893	744.655	20.1747	332.104	8.75919	40.9226	612.363	70.6	0
4MNGOW_S_2	Male	Bulgan	Urban	Summer	2	52	Wedesday	August	1.24649	151.783	22.7162	24.1768	1203	1.76048	1.38967	1565.01	8.8772	86.7935	11.9654	18.2782	211.884	9.25	0
4MNGOW_S_3	Male	Bulgan	Urban	Summer	3	52	Sunday	August	0.997193	79.5135	7.6642	14.3462	1.53062	0.655379	0.490777	125.828	4.31533	6.16001	1.34654	11.5107	78.0177	13.344	0
4MNGOW_W_1	Male	Bulgan	Urban	Winter	1	51	Friday	January	1.33882	199.652	22.23	39.9885	49	1.84295	1.03795	200.53	13.019	39.6704	3.83025	28.9987	312.983	28	0
4MNGOW_W_2	Male	Bulgan	Urban	Winter	2	51	Saturday	January	1.33882	155.874	31.8415	41.0409	0	1.76816	0.671083	19.7931	19.6232	20.7926	4.36899	37.2868	514.168	0	0
4MNGOW_W_3	Male	Bulgan	Urban	Winter	3	51	Sunday	January	1.07106	65.6351	8.58222	11.2572	1.50965	0.596387	0.247589	132.705	5.26736	4.44332	2.51976	13.5371	146.195	3.9	0
5MNGOW_S_1	Male	Bulgan	Urban	Summer	1	38	Tuesday	August	2.69781	105.346	9.48348	13.3955	58.6679	0.912168	0.370037	101.101	5.91038	8.00442	1.59677	14.9029	130.214	0	0
5MNGOW_S_2	Male	Bulgan	Urban	Summer	2	38	Wedesday	August	2.69781	96.2919	11.9612	8.60004	0	0.652714	0.233659	45.1468	4.94447	0.619752	5.28143	8.4281	240.835	32.17	0
5MNGOW_S_3	Male	Bulgan	Urban	Summer	3	38	Thursday	August	2.69781	148.108	7.67834	9.51493	209.305	1.43157	0.472325	470.306	5.5197	113.709	2.90567	13.223	41.9783	13.25	54.4621
5MNGOW_W_1	Male	Bulgan	Urban	Winter	1	38	Friday	January	3.07327	238.221	16.4503	22.1823	5516.55	4.04058	0.987563	5660.93	59.0508	24.1153	3.47488	19.1354	346.798	10.9	78.9239
5MNGOW_W_2	Male	Bulgan	Urban	Winter	2	38	Saturday	January	3.07327	39.4402	7.36563	6.30507	21.6241	0.436047	0.237802	70.2543	3.08834	4.39083	5.87274	8.10411	194.284	10.78	6.93051
5MNGOW_W_3	Male	Bulgan	Urban	Winter	3	38	Sunday	January	2.45861	31.4024	4.52066	6.97028	48.4781	0.637896	0.309016	264.208	3.57519	10.2826	1.29145	9.2507	0.0220245	11.25	94.7382
6MNGOW_S_1	Male	Bulgan	Urban	Summer	1	32	Tuesday	August	0.90492	77.6201	13.0643	18.4034	156.905	1.04961	0.398016	265.553	7.14471	23.7544	9.061	18.3469	330.155	16.576	101.908
6MNGOW_S_2	Male	Bulgan	Urban	Summer	2	32	Wedesday	August	0.90492	29.6698	3.60379	6.10889	294.664	0.841712	0.317965	318.119	2.69362	34.5058	1.974	6.71294	81.2779	0	206.527
6MNGOW_S_3	Male	Bulgan	Urban	Summer	3	32	Thursday	August	0.90492	150.878	9.28518	13.151	47.0268	0.975257	0.756267	182.525	3.63598	10.1981	3.49508	9.55993	136.122	8.536	101.908
6MNGOW_W_1	Male	Bulgan	Urban	Winter	1	32	Friday	January	0.915606	188.329	16.3108	12.4694	115.237	1.18814	0.678125	138.961	4.79787	20.0662	5.70694	12.5892	388.511	15.84	158.314
6MNGOW_W_2	Male	Bulgan	Urban	Winter	2	32	Saturday	January	0.915606	176.556	14.08	14.6302	88.3326	1.26954	0.771712	146.223	6.84102	12.502	6.03897	17.0524	200.153	15.488	138.613
6MNGOW_W_3	Male	Bulgan	Urban	Winter	3	32	Sunday	January	0.732485	175.048	20.488	33.2523	108.998	2.31434	1.20972	858.753	11.7998	86.7659	5.20166	41.2271	9.75	40.42	188.473
7MNGOW_W_1	Male	Bulgan	Urban	Winter	1	32	Friday	January	0.915606	50.6634	7.20643	11.3457	0	0.471267	0.139606	0.28511	4.6855	7.79812	1.09745	11.7088	161.611	0	0
7MNGOW_W_2	Male	Bulgan	Urban	Winter	2	32	Saturday	January	0.915606	77.3407	16.2879	15.914	2.88176	0.990117	0.483467	54.4426	9.36184	0.392436	4.81269	23.4483	131.127	19.056	0
7MNGOW_W_3	Male	Bulgan	Urban	Winter	3	32	Sunday	January	0.732485	64.1399	6.74503	7.22153	103.801	1.11805	0.33794	152.973	4.60306	12.408	2.24233	11.1713	195.798	7.8	278.177
8MNGOW_W_1	Male	Bulgan	Urban	Winter	1	32	Friday	January	0.915606	96.6854	15.2292	21.2509	237.521	1.31621	0.912698	334.615	9.39835	26.0557	3.64762	23.6306	232.255	0	56.8388
8MNGOW_W_2	Male	Bulgan	Urban	Winter	2	32	Saturday	January	0.915606	79.9265	8.3419	10.1842	313.023	1.36706	0.845764	421.962	4.4344	23.7132	3.38977	12.5725	141.604	8.832	0
8MNGOW_W_3	Male	Bulgan	Urban	Winter	3	32	Sunday	January	0.732485	96.822	19.171	27.1438	23.8154	1.7483	2.0365	165.845	7.29617	67.6198	11.219	23.3754	340.223	23.88	47.8812
9MNGOW_W_1	Male	Bulgan	Urban	Winter	1	43	Friday	January	3.07327	88.481	12.3534	15.342	182.701	1.54692	0.424997	202.635	5.97536	22.4385	3.09276	17.2826	187.988	1.672	340.729
9MNGOW_W_2	Male	Bulgan	Urban	Winter	2	43	Saturday	January	3.07327	114.564	7.59085	8.58291	276.017	1.02613	0.741314	308.56	2.06883	20.8441	2.38756	6.6706	107.148	0	65.0365
9MNGOW_W_3	Male	Bulgan	Urban	Winter	3	43	Sunday	January	2.45861	153.492	18.4774	27.5955	218.333	1.62747	0.724036	240.123	11.075	31.9015	3.86825	28.3016	351.221	0	45.7048
10FDOW_S_1	Female	Dornod	Urban	Summer	1	46	Friday	July	1.04824	76.6967	10.0939	18.1392	30.4914	0.890976	0.348857	34.9049	12.3292	3.71064	1.70377	20.5202	19.9351	10.7	0
10FDOW_S_2	Female	Dornod	Urban	Summer	2	46	Saturday	July	1.04824	91.4175	16.4415	15.3125	0.36	1.20107	0.536745	294.663	5.14006	0.751107	11.3065	15.8688	329.462	19.348	0
10FDOW_S_3	Female	Dornod	Urban	Summer	3	46	Sunday	July	0.838589	233.619	14.5447	17.7518	94.91	1.56335	0.600436	329.866	3.51997	58.8171	11.5261	11.9461	185.548	41.19	0
10FDOW_W_1	Female	Dornod	Urban	Winter	1	46	Wedesday	February	1.06765	90.5323	14.4658	15.1652	124.163	1.12515	1.19687	155.94	3.6868	16.7193	2.1672	5.52053	226.108	0	30.4699
10FDOW_W_2	Female	Dornod	Urban	Winter	2	46	Thursday	February	1.06765	73.1116	8.46569	12.806	141.999	0.88345	0.701391	148.345	5.79532	11.5961	1.39047	9.47103	95.2231	5.75	0
10FDOW_W_3	Female	Dornod	Urban	Winter	3	46	Friday	February	1.06765	81.1771	13.9707	11.6646	54.3257	0.792547	0.360246	71.7326	6.54425	13.8172	3.27267	7.46834	182.761	0	56.2028
1FDOW_S_1	Female	Dornod	Urban	Summer	1	25	Friday	July	1.82429	128.558	6.8836	10.9512	281.986	1.90986	0.59135	442.932	2.58458	10.3627	3.42301	14.7548	30.8804	0	39.1711
1FDOW_S_2	Female	Dornod	Urban	Summer	2	25	Saturday	July	1.82429	106.21	8.83191	11.6203	111.769	1.13403	0.589738	164.309	3.05185	16.9412	5.63655	9.23438	185.828	8.092	77.8468
1FDOW_S_3	Female	Dornod	Urban	Summer	3	25	Sunday	July	1.45943	26.4624	3.90406	4.53135	28.6579	0.471923	0.330663	39.3363	1.01051	4.49734	1.34457	2.84961	81.433	2.38	59.4641
1FDOW_W_1	Female	Dornod	Urban	Winter	1	25	Friday	January	1.76348	75.3336	10.1605	10.9731	158.265	0.922911	0.43838	848.048	3.64895	14.9451	3.31281	10.3562	225.327	0	46.2169
1FDOW_W_2	Female	Dornod	Urban	Winter	2	25	Saturday	January	1.76348	214.748	29.5209	27.118	442.631	2.07997	1.19556	1720.5	14.1562	124.244	12.0268	21.2269	246.572	0	98.0163
1FDOW_W_3	Female	Dornod	Urban	Winter	3	25	Sunday	January	1.41079	63.1824	29.2743	25.4048	55.4787	1.58339	0.779246	857.887	12.8936	7.81253	8.86402	18.9615	247.459	10.836	123.928
2FDOW_S_1	Female	Dornod	Urban	Summer	1	51	Friday	July	1.04824	73.7459	9.28599	13.5629	176.88	1.94872	0.90455	229.454	5.53493	27.6952	4.43049	13.2152	160.588	5.936	222.552
2FDOW_S_2	Female	Dornod	Urban	Summer	2	51	Saturday	July	1.04824	166.979	19.817	30.7219	571.481	2.68983	1.73159	664.04	10.0005	56.4178	5.25768	27.1529	337.773	8.808	77.8421
2FDOW_S_3	Female	Dornod	Urban	Summer	3	51	Sunday	July	0.838589	177.902	13.3729	14.1871	288.239	1.64175	1.0465	338.901	3.5524	64.773	2.53936	8.91158	317.786	9.36	94.7408
2FDOW_W_1	Female	Dornod	Urban	Winter	1	51	Friday	January	1.06765	41.0908	8.49502	9.06922	40.2926	0.654323	0.350081	139.629	4.39676	3.75491	1.35758	7.52272	22.2112	3.072	54.5385
2FDOW_W_2	Female	Dornod	Urban	Winter	2	51	Saturday	January	1.06765	105.565	11.4562	10.8599	367.442	1.77577	1.03361	392.72	3.06075	114.341	4.42551	6.9178	199.618	4.788	111.598
2FDOW_W_3	Female	Dornod	Urban	Winter	3	51	Sunday	January	0.854118	66.823	10.5943	14.3504	1647.11	1.81749	0.608787	1656	24.336	17.8904	1.64959	10.5705	88.0071	0	94.9928
3FDOW_S_1	Female	Dornod	Urban	Summer	1	45	Friday	July	1.04824	112.234	10.2175	9.92173	447.898	1.54196	1.0005	528.149	2.72834	113.647	3.34439	7.49104	70.2541	12.697	0
3FDOW_S_2	Female	Dornod	Urban	Summer	2	45	Saturday	July	1.04824	102.046	13.0954	15.8816	96.9211	1.38008	0.897649	252.99	5.8	14.0259	9.19696	18.2589	199.255	33.468	36.359
3FDOW_S_3	Female	Dornod	Urban	Summer	3	45	Sunday	July	0.838589	81.6365	8.79496	11.6228	100.92	0.640393	0.388491	1352.35	3.65524	13.5458	7.39754	10.5731	210.166	12.236	0
3FDOW_W_1	Female	Dornod	Urban	Winter	1	45	Friday	January	1.06765	61.5844	6.30753	6.93249	176.472	1.1012	0.534306	189.136	2.93313	20.9225	1.92588	6.79933	68.509	0	228.874
3FDOW_W_2	Female	Dornod	Urban	Winter	2	45	Saturday	January	1.06765	68.1553	14.3437	13.9655	247.06	1.11718	0.46538	270.852	7.78239	27.4356	5.11369	20.5292	308.602	0	83.2656
3FDOW_W_3	Female	Dornod	Urban	Winter	3	45	Sunday	January	0.854118	71.1227	13.7333	18.0814	110.622	1.79859	0.542258	140.739	13.3955	0.415936	3.6279	30.1274	66.2866	0	0
4FDOW_S_1	Female	Dornod	Urban	Summer	1	51	Friday	July	1.04824	33.7853	7.84901	7.01665	321.101	0.971947	0.397803	338.968	5.08113	21.5909	2.38986	10.0298	143.828	25.2	200.158
4FDOW_S_2	Female	Dornod	Urban	Summer	2	51	Saturday	July	1.04824	94.8241	8.84855	12.8367	316.258	1.19309	1.07731	496.93	5.50932	27.6002	2.89526	9.6127	75.7772	6.096	99.3471
4FDOW_S_3	Female	Dornod	Urban	Summer	3	51	Sunday	July	0.838589	116.931	14.1625	17.1353	313.262	1.97183	1.20892	1077.7	3.45018	27.8419	8.96739	14.3706	406.762	0	206.119
4FDOW_W_1	Female	Dornod	Urban	Winter	1	51	Friday	January	1.06765	56.06	9.34699	16.0074	576.229	1.8093	0.57968	648.322	5.9309	42.4586	1.90316	14.291	120.054	0	140.955
4FDOW_W_2	Female	Dornod	Urban	Winter	2	51	Saturday	January	1.06765	96.7208	11.0612	16.2181	185.793	0.902493	0.770433	359.235	4.65305	23.1699	3.21358	13.6758	263.921	8.475	32.0062
4FDOW_W_3	Female	Dornod	Urban	Winter	3	51	Sunday	January	0.854118	152.452	20.0408	44.7096	118.448	1.98564	0.951192	238.562	18.0804	35.9519	3.06101	42.3674	119.035	0	95.6344
5FDOW_S_1	Female	Dornod	Urban	Summer	1	24	Friday	July	1.82429	106.944	9.54119	12.0347	243.038	1.32134	0.580738	322.438	5.02071	104.903	2.32911	11.4834	277.312	11.472	71.3097
5FDOW_S_2	Female	Dornod	Urban	Summer	2	24	Saturday	July	1.82429	70.2101	11.7062	17.4374	99.1643	1.28449	1.07876	139.535	6.53439	27.933	4.51261	12.3181	232.077	7.728	127.861
5FDOW_S_3	Female	Dornod	Urban	Summer	3	24	Sunday	July	1.45943	81.0319	12.1119	16.4765	164.009	1.4704	0.669192	422.402	5.90362	19.8639	4.63478	15.7421	239.054	3.224	124.568
5FDOW_W_1	Female	Dornod	Urban	Winter	1	24	Friday	January	1.76348	55.0806	9.16613	14.0293	37.9126	0.803336	0.221064	125.784	6.0613	14.4646	1.92481	14.8435	195.098	0	89.6173
5FDOW_W_2	Female	Dornod	Urban	Winter	2	24	Saturday	January	1.76348	46.8755	9.3543	9.69608	45.7028	0.79005	0.248767	110.014	4.5611	6.56729	8.35863	11.7169	236.068	14.252	49.0334
5FDOW_W_3	Female	Dornod	Urban	Winter	3	24	Sunday	January	1.41079	216.674	30.1237	31.6259	72.5463	2.1342	1.4432	1950.42	12.0294	25.3777	7.04192	26.4437	290.092	1.55	51.2099
6FDOW_S_1	Female	Dornod	Urban	Summer	1	44	Friday	July	1.2183	92.5575	10.3453	15.9697	4.72	1.11104	0.825524	369.081	4.08621	11.2844	3.28754	12.3527	34.2364	6.168	0
6FDOW_S_2	Female	Dornod	Urban	Summer	2	44	Saturday	July	1.2183	77.3176	7.74233	10.3664	323.976	1.48093	0.824836	360.983	4.36147	21.2607	3.95367	9.50835	187.358	4.536	34.9664
6FDOW_S_3	Female	Dornod	Urban	Summer	3	44	Sunday	July	0.974643	119.958	17.8851	21.9908	263.55	2.28362	1.16107	347.985	5.87632	9.74963	8.41227	21.9699	398.276	18.408	0
6FDOW_W_1	Female	Dornod	Urban	Winter	1	44	Monday	January	1.02814	81.8719	10.5037	14.7071	189.717	1.01338	0.711457	339.565	6.53432	11.0335	2.25149	15.2883	87.9912	21.336	27.9104
6FDOW_W_2	Female	Dornod	Urban	Winter	2	44	Tuesday	January	1.28518	51.4903	14.0255	16.5059	92.1349	1.04549	0.64142	220.355	8.45978	14.7192	2.3392	12.3485	159.954	16.752	67.5024
6FDOW_W_3	Female	Dornod	Urban	Winter	3	44	Wedesday	January	1.28518	106.562	17.4681	15.8261	185.266	0.896128	0.829319	502.637	7.46731	14.5865	8.23559	8.52674	276.526	20.04	0
7FDOW_S_1	Female	Dornod	Urban	Summer	1	48	Friday	July	1.04824	122.991	17.8875	21.2105	203.421	1.95244	1.57737	267.769	3.92908	6.77017	7.29098	13.1716	387.789	11.536	0
7FDOW_S_2	Female	Dornod	Urban	Summer	2	48	Saturday	July	1.04824	102.412	13.443	19.0964	514.09	3.17833	2.4306	612.418	3.6541	49.9164	3.06491	10.8253	162.936	13.008	137.305
7FDOW_S_3	Female	Dornod	Urban	Summer	3	48	Sunday	July	0.838589	107.5	16.5669	18.8666	421.773	1.62577	1.56132	523.887	2.75917	36.7271	4.78499	10.2511	230.833	0	66.5728
7FDOW_W_1	Female	Dornod	Urban	Winter	1	48	Tuesday	February	1.06765	125.231	20.8841	20.5055	380.393	2.57324	0.894743	439.44	12.3014	47.6843	13.3652	29.7329	308.19	0	404.573
7FDOW_W_2	Female	Dornod	Urban	Winter	2	48	Wedesday	February	1.06765	131.447	11.378	13.9062	1061.79	1.63956	0.85333	1232.54	9.13395	69.9279	7.03809	15.624	122.283	0	154.91
7FDOW_W_3	Female	Dornod	Urban	Winter	3	48	Thursday	February	1.06765	126.612	13.9694	9.91876	288.663	1.31177	0.502933	384.835	5.4631	63.9132	6.91671	14.3146	310.563	17.804	135.916
8FDOW_S_1	Female	Dornod	Urban	Summer	1	34	Friday	July	1.2183	47.8032	6.63754	9.74969	141.628	1.10351	0.983561	146.14	3.22848	26.9884	1.36554	4.54024	90.4463	0	156.318
8FDOW_S_2	Female	Dornod	Urban	Summer	2	34	Saturday	July	1.2183	56.8057	9.83895	11.6117	200.506	1.16088	0.931924	265.1	3.12267	21.0229	1.38851	5.17405	109.242	9.456	152.861
8FDOW_S_3	Female	Dornod	Urban	Summer	3	34	Sunday	July	0.974643	47.0508	6.07187	6.61026	136.48	0.655313	0.570109	240.612	1.72642	12.9936	1.1396	2.89844	66.4114	3.552	70.5416
8FDOW_W_1	Female	Dornod	Urban	Winter	1	34	Friday	January	1.28518	68.017	12.2803	12.1171	606.795	1.12501	0.767147	664.047	5.09938	44.3538	5.60364	14.8323	225.672	0	58.944
8FDOW_W_2	Female	Dornod	Urban	Winter	2	34	Saturday	January	1.28518	45.5413	4.32266	6.85929	156.752	0.672381	0.375251	250.205	3.23557	14.8603	1.49957	8.75239	5.46214	13.392	92.3022
8FDOW_W_3	Female	Dornod	Urban	Winter	3	34	Sunday	January	1.02814	97.7239	22.5143	20.4634	32.2072	1.41417	1.00789	1843.21	7.54376	7.5691	10.1672	16.2343	324.79	31.818	74.7257
9FDOW_S_1	Female	Dornod	Urban	Summer	1	48	Friday	July	1.04824	113.259	14.0519	19.8575	215.393	1.17006	1.09772	455.251	4.25854	23.8894	3.05193	13.3925	444.595	19.632	0
9FDOW_S_2	Female	Dornod	Urban	Summer	2	48	Saturday	July	1.04824	197.622	15.495	18.9138	461.455	1.84137	1.31955	492.692	3.39008	130.299	7.95247	9.48175	230.815	19.15	0
9FDOW_S_3	Female	Dornod	Urban	Summer	3	48	Sunday	July	0.838589	104.433	17.5552	13.2153	196.264	1.08281	0.997473	324.588	3.53465	17.0705	10.2308	11.8049	255.419	10.052	12.8025
9FDOW_W_1	Female	Dornod	Urban	Winter	1	48	Wedesday	January	1.06765	81.0738	10.3893	14.2714	534.179	1.11592	0.936453	589.277	4.45916	49.9605	4.27669	11.2193	162.714	0	25.6049
9FDOW_W_2	Female	Dornod	Urban	Winter	2	48	Thursday	January	1.06765	92.3185	11.7326	14.7379	169.12	0.962645	0.735517	202.362	4.85679	16.1874	3.16222	13.5793	202.006	0	0
9FDOW_W_3	Female	Dornod	Urban	Winter	3	48	Friday	January	1.06765	120.764	14.6235	22.4017	153.504	1.37264	0.723399	170.295	8.05074	37.4372	3.799	20.1742	267.589	0	147.221
10MDOW_S_1	Male	Dornod	Urban	Summer	1	52	Friday	July	1.24649	104.435	10.8339	17.0356	219.895	1.72191	0.932128	259.364	5.23277	27.2631	1.8513	13.5782	152.182	0	216.146
10MDOW_S_2	Male	Dornod	Urban	Summer	2	52	Saturday	July	1.24649	108.27	13.6052	17.9798	594.666	1.9576	1.32581	663.215	4.70406	56.4195	3.46999	11.8723	299.765	4.92	295.904
10MDOW_S_3	Male	Dornod	Urban	Summer	3	52	Sunday	July	0.997193	79.0686	12.462	14.3166	319.103	1.44512	1.07483	323.971	3.45849	30.8804	2.21942	9.5894	216.068	0	132.08
1MDOW_S_1	Male	Dornod	Urban	Summer	1	30	Friday	July	0.90492	141.203	20.264	31.4717	217.838	1.75207	1.2906	242.213	4.96548	36.8501	6.36343	15.721	268.261	49.05	81.5517
1MDOW_S_2	Male	Dornod	Urban	Summer	2	30	Saturday	July	0.90492	121.595	16.7551	21.9801	30.0299	1.43598	1.14274	403.851	5.88361	11.6039	4.4722	15.8289	223.705	0	63.1161
1MDOW_S_3	Male	Dornod	Urban	Summer	3	30	Sunday	July	0.723936	185.872	15.3033	21.5944	512.392	3.33112	2.18544	520.597	11.6352	183.862	19.4846	17.0727	170.08	11.175	0
1MDOW_W_1	Male	Dornod	Urban	Winter	1	30	Friday	January	0.915606	59.5892	17.1041	16.9228	85.4993	1.04831	0.681128	117.384	8.7421	7.71184	5.1572	21.9552	75.0819	11.28	0
1MDOW_W_2	Male	Dornod	Urban	Winter	2	30	Saturday	January	0.915606	59.8212	20.4786	15.8548	28.719	1.02515	0.490637	124.633	8.55049	4.86281	9.70782	11.3177	442.772	33.62	68.0901
1MDOW_W_3	Male	Dornod	Urban	Winter	3	30	Sunday	January	0.732485	100.148	26.2567	20.8973	6.85852	1.13925	0.661145	203.788	10.8133	1.9083	12.8654	18.0972	553.195	22.008	0
2MDOW_S_1	Male	Dornod	Urban	Summer	1	54	Friday	July	1.24649	370.617	14.5379	18.6644	428.195	2.30885	1.35337	457.487	4.34324	45.8165	2.82849	11.3028	234.717	2.024	159.007
2MDOW_S_2	Male	Dornod	Urban	Summer	2	54	Saturday	July	1.24649	253.617	19.4305	25.4924	69.8199	1.89136	1.14372	112.551	9.07732	23.8423	2.9752	17.2804	470.568	0	59.1474
2MDOW_S_3	Male	Dornod	Urban	Summer	3	54	Sunday	July	0.997193	69.6297	13.2144	11.2223	1.76107	0.690094	0.611134	67.2455	4.23693	0.607223	4.86123	5.56547	296.826	13.952	0
2MDOW_W_1	Male	Dornod	Urban	Winter	1	54	Friday	January	1.33882	459.714	27.5162	53.1459	43.3888	3.01926	2.55721	163.669	13.2072	39.707	2.14115	35.7989	250.12	33.768	0
2MDOW_W_2	Male	Dornod	Urban	Winter	2	54	Saturday	January	1.33882	279.057	21.4961	29.3858	0	1.7492	0.803391	67.8444	10.0172	16.2073	8.4059	26.7218	511.801	15.064	0
2MDOW_W_3	Male	Dornod	Urban	Winter	3	54	Sunday	January	1.07106	272.257	23.5584	29.9234	162.909	1.96472	0.989497	307.884	10.3827	24.2843	15.3137	26.7502	608.415	31.808	63.8843
3MDOW_S_1	Male	Dornod	Urban	Summer	1	31	Friday	July	0.90492	83.937	10.1597	19.3907	267.325	1.1151	0.952586	365.915	5.71649	39.5295	2.11275	13.3077	119.304	11.544	56.8429
3MDOW_S_2	Male	Dornod	Urban	Summer	2	31	Saturday	July	0.90492	77.2533	10.3704	16.0327	292.299	1.67241	1.14862	314.834	2.69948	39.7804	2.26487	9.86847	145.525	0	70.1575
3MDOW_S_3	Male	Dornod	Urban	Summer	3	31	Sunday	July	0.723936	212.78	18.0254	14.5224	642.495	4.05036	2.43681	699.136	5.18332	125.435	8.99535	8.81702	306.444	17.692	15.1069
4MDOW_S_1	Male	Dornod	Urban	Summer	1	29	Friday	July	0.90492	149.006	14.4671	20.6903	488.964	1.27982	0.505994	548.561	12.3247	13.4745	6.93871	19.0701	261.015	27.02	0
4MDOW_S_2	Male	Dornod	Urban	Summer	2	29	Saturday	July	0.90492	20.8879	3.91373	4.34127	15.08	0.256565	0.0768481	16.7767	2.13662	2.97278	0.7448	5.61702	85.78	12.45	0
4MDOW_S_3	Male	Dornod	Urban	Summer	3	29	Sunday	July	0.723936	163.89	14.7152	28.0478	7.30661	1.10964	0.643053	179.96	10.6431	15.5743	2.80845	26.7909	241.048	27.688	0
4MDOW_W_1	Male	Dornod	Urban	Winter	1	29	Friday	January	0.915606	98.5636	14.3235	16.9839	185.671	1.02799	0.470274	217.835	6.9636	10.7274	5.19496	17.0088	313.226	7	11.2387
4MDOW_W_2	Male	Dornod	Urban	Winter	2	29	Saturday	January	0.915606	35.2667	10.5818	11.2895	19.8355	0.704373	0.303787	95.8906	5.64389	3.71882	4.32537	11.8672	169.168	13.42	41.7706
4MDOW_W_3	Male	Dornod	Urban	Winter	3	29	Sunday	January	0.732485	40.4645	12.7166	11.8979	33.9202	0.773314	0.307124	64.8072	6.73335	6.41026	4.47794	14.5109	255.771	5.404	60.9481
5MDOW_S_1	Male	Dornod	Urban	Summer	1	41	Friday	July	2.69781	202.506	13.2958	12.2067	3.60691	1.0436	0.418774	311.457	5.80872	0.936778	6.86885	16.4982	327.956	19.076	0
5MDOW_S_2	Male	Dornod	Urban	Summer	2	41	Saturday	July	2.69781	92.8233	15.0048	17.4596	158.939	1.20778	1.4146	267.442	3.70346	15.1099	2.81623	11.8369	229.353	10.272	0
5MDOW_S_3	Male	Dornod	Urban	Summer	3	41	Sunday	July	2.15825	161.536	31.0582	38.62	76.8682	2.64256	2.49211	1498.71	14.3846	40.7484	5.60869	23.1211	273.655	0	172.577
5MDOW_W_1	Male	Dornod	Urban	Winter	1	39	Thursday	January	3.07327	52.6335	8.2139	10.196	0	0.553415	0.302831	110.34	4.97611	1.93118	4.31568	13.2983	133.639	18.16	0
5MDOW_W_2	Male	Dornod	Urban	Winter	2	39	Friday	January	3.07327	128.881	15.9398	21.0414	165.772	1.67879	0.805503	292.108	13.2171	68.7087	8.63354	29.8503	29.7481	12.552	23.0444
5MDOW_W_3	Male	Dornod	Urban	Winter	3	39	Saturday	January	3.07327	192.209	20.3476	37.4996	95.9276	2.40486	2.70884	2052.24	10.3888	29.4095	6.04672	22.5412	154.357	10.5	21.7642
6MDOW_S_1	Male	Dornod	Urban	Summer	1	40	Friday	July	2.69781	68.9474	15.3694	12.7692	204.921	1.09617	0.747423	278.512	5.31352	17.58	7.9567	7.38393	293.855	14.308	107.259
6MDOW_S_2	Male	Dornod	Urban	Summer	2	40	Saturday	July	2.69781	67.5184	6.83234	9.2469	36.8958	0.754286	0.652899	61.0933	0.326848	3.18544	0.941721	2.52709	138.453	0	51.978
6MDOW_S_3	Male	Dornod	Urban	Summer	3	40	Sunday	July	2.15825	72.6227	17.5262	15.3434	340.871	1.4792	1.09335	418.505	5.41222	28.6117	8.5095	8.03953	335.354	13.748	210.566
7MDOW_S_1	Male	Dornod	Urban	Summer	1	48	Friday	July	1.24649	165.691	31.5914	34.1209	206.54	2.84129	2.36079	545.019	11.9786	43.394	7.98199	27.3503	583.455	94.65	190.323
7MDOW_S_2	Male	Dornod	Urban	Summer	2	48	Saturday	July	1.24649	143.748	16.2975	20.3554	130.748	1.40086	0.95793	351.512	4.69908	11.3651	8.61281	6.879	298.286	12.964	68.4156
7MDOW_S_3	Male	Dornod	Urban	Summer	3	48	Sunday	July	0.997193	65.6271	16.1763	15.0094	110.639	1.29921	0.872376	317.141	6.08263	12.2289	3.83948	8.20272	215.847	0	154.353
8MDOW_S_1	Male	Dornod	Urban	Summer	1	30	Friday	July	0.90492	59.8137	5.88967	12.4441	11.1044	0.52726	0.306479	124.772	4.67812	8.00122	0.810586	11.8759	150.519	14.832	18.4355
8MDOW_S_2	Male	Dornod	Urban	Summer	2	30	Saturday	July	0.90492	50.2516	11.5328	12.7354	100.489	0.721481	0.511112	154.615	5.06684	13.3028	4.78139	9.07396	219.3	8.148	38.4074
8MDOW_S_3	Male	Dornod	Urban	Summer	3	30	Sunday	July	0.723936	52.4127	19.2925	13.7773	37.8017	0.949085	0.419151	115.667	8.24558	5.89851	8.67715	9.41614	360.226	39.028	87.4377
8MDOW_W_1	Male	Dornod	Urban	Winter	1	30	Saturday	January	0.915606	51.9449	22.3125	15.5585	119.22	1.57904	0.490231	129.638	10.0159	9.43671	2.81634	12.2853	347.488	94.65	146.742
8MDOW_W_2	Male	Dornod	Urban	Winter	2	30	Sunday	January	0.732485	179.454	14.5035	24.7962	61.9193	1.68511	0.891959	93.4457	5.14752	11.0007	1.7935	9.62515	244.079	27.45	139.144
8MDOW_W_3	Male	Dornod	Urban	Winter	3	30	Monday	January	0.732485	100.998	26.0782	24.3638	33.3261	1.79887	1.36321	341.551	6.97064	4.78191	7.70564	12.9839	381.419	14.616	74.7664
9MDOW_S_1	Male	Dornod	Urban	Summer	1	31	Friday	July	0.90492	744.815	65.7648	100.779	41813	24.7937	3.04654	41861.8	432.549	9.56499	8.01884	60.7866	300.32	27.9	25.861
9MDOW_S_2	Male	Dornod	Urban	Summer	2	31	Saturday	July	0.90492	421.581	46.9635	61.3576	22864.9	14.1619	2.7214	23003.2	231.241	0.53371	12.5911	40.6716	635.93	89.348	0
9MDOW_S_3	Male	Dornod	Urban	Summer	3	31	Sunday	July	0.723936	592.629	44.0692	69.0008	14885.2	9.99549	2.07222	14930.3	177.217	90.5287	4.43341	35.9784	199.818	0	215.565
9MDOW_W_1	Male	Dornod	Urban	Winter	1	31	Friday	January	0.915606	296.982	28.7005	45.9824	210.749	2.73344	1.219	238.432	12.2144	21.5312	3.58899	14.9762	242.953	12.65	153.245
9MDOW_W_2	Male	Dornod	Urban	Winter	2	31	Saturday	January	0.915606	515.698	9.18056	50.8124	356.489	2.78424	1.0821	398.629	3.33077	31.117	2.73657	10.1901	125.306	0	71.6938
9MDOW_W_3	Male	Dornod	Urban	Winter	3	31	Sunday	January	0.732485	61.487	8.71141	16.1547	61.4702	1.16844	0.733472	84.5051	5.26834	14.7821	1.00527	12.838	83.2461	0	145.308
10FKHOW_S_1	Female	Khovd	Urban	Summer	1	44	Monday	July	0.974643	46.7761	3.31772	6.64046	323.303	1.71924	0.473705	396.977	3.55239	23.5388	1.55744	9.31958	0.375995	10.416	278.441
10FKHOW_S_2	Female	Khovd	Urban	Summer	2	44	Tuesday	July	1.2183	55.1508	9.78172	18.1904	1595.48	1.98192	0.558078	1628.71	23.5565	18.2483	2.52907	14.7146	34.0989	0	92.9459
10FKHOW_S_3	Female	Khovd	Urban	Summer	3	44	Wedesday	July	1.2183	75.9838	8.96315	10.0886	653.715	1.97481	0.667865	749.142	2.80462	48.9048	9.64304	13.0787	259.733	13.16	169.249
10FKHOW_W_1	Female	Khovd	Urban	Winter	1	44	Friday	January	1.28518	114.337	13.0995	13.4281	47.95	1.46623	0.397879	78.383	30.9712	3.85962	4.19694	13.0811	221.416	6.748	0
10FKHOW_W_2	Female	Khovd	Urban	Winter	2	44	Saturday	January	1.28518	57.4222	7.90481	12.7278	170.049	0.876983	0.567784	213.731	4.77991	43.3551	4.71452	8.08515	172.288	7.784	117.271
10FKHOW_W_3	Female	Khovd	Urban	Winter	3	44	Sunday	January	1.02814	62.4857	4.42286	4.17475	27.6887	0.511313	0.472916	27.6936	0.330492	3.48562	1.22526	1.34269	84.7257	4.488	61.8359
11FKHOW_S_1	Female	Khovd	Urban	Summer	1	38	Monday	July	0.974643	259.641	32.71	50.5459	5940.24	5.96819	1.40953	5940.31	98.5145	33.7598	5.37897	35.1073	94.2826	6.424	187.172
11FKHOW_S_2	Female	Khovd	Urban	Summer	2	38	Tuesday	July	1.2183	271.398	21.9793	47.7564	304.194	2.10807	0.922132	304.199	22.0662	40.9066	4.87365	47.2173	100.115	13.552	64.6524
11FKHOW_S_3	Female	Khovd	Urban	Summer	3	38	Wedesday	July	1.2183	231.318	9.6947	9.43926	273.649	0.734467	0.578904	307.282	4.29641	12.2718	4.84622	7.87865	185.903	16.104	0
1FKHOW_S_1	Female	Khovd	Urban	Summer	1	43	Tuesday	July	1.2183	169.94	15.9547	17.1841	248.089	1.98578	0.750264	252.861	6.52117	69.7781	5.02587	18.4385	342.06	50.264	281.142
1FKHOW_S_2	Female	Khovd	Urban	Summer	2	43	Wedesday	July	1.2183	163.797	23.0616	34.9257	111.265	3.07596	1.51088	394.094	9.98467	58.7409	20.532	29.4597	600.497	25.48	89.0503
1FKHOW_S_3	Female	Khovd	Urban	Summer	3	43	Thursday	July	1.2183	243.799	10.3101	9.58115	303.794	1.81083	0.771637	304.385	5.23585	51.1282	5.58313	10.0983	208.419	19.272	67.469
1FKHOW_W_1	Female	Khovd	Urban	Winter	1	43	Saturday	January	1.28518	273.449	16.9787	19.2599	132.605	1.82267	1.18934	392.389	7.29335	20.3539	7.14116	20.8998	195.001	32.967	174.154
1FKHOW_W_2	Female	Khovd	Urban	Winter	2	43	Sunday	January	1.02814	278.81	20.1195	14.8294	103.716	1.58586	1.05073	165.639	6.18205	13.2515	11.0979	11.7869	389.657	34.764	224.299
1FKHOW_W_3	Female	Khovd	Urban	Winter	3	43	Monday	January	1.02814	228.044	36.0122	25.1748	105.282	2.07669	1.64597	159.854	13.1699	15.9202	15.7699	20.4098	503.028	13.024	238.49
2FKHOW_S_1	Female	Khovd	Urban	Summer	1	38	Monday	July	0.974643	118.821	14.1144	16.2709	295.405	1.45572	0.984039	362.074	4.04446	14.1763	10.1454	11.6569	299.992	11.116	143.826
2FKHOW_S_2	Female	Khovd	Urban	Summer	2	38	Tuesday	July	1.2183	69.8583	4.50289	4.89766	288.944	1.00376	0.589847	305.049	1.16492	4.61136	5.13016	2.71186	85.1553	2.904	81.2869
2FKHOW_S_3	Female	Khovd	Urban	Summer	3	38	Wedesday	July	1.2183	172.942	7.65656	7.38888	84.93	0.669657	0.50371	97.5891	2.3666	50.0145	4.06346	5.72747	141.174	14.696	0
2FKHOW_W_1	Female	Khovd	Urban	Winter	1	38	Friday	January	1.28518	169.475	14.6178	19.0544	24.8907	1.35932	1.17928	78.336	4.25634	9.71177	2.63426	12.1081	298.703	4.224	55.4347
2FKHOW_W_2	Female	Khovd	Urban	Winter	2	38	Saturday	January	1.28518	321.162	16.9613	13.3573	359.197	1.50645	1.05031	413.735	4.37574	36.8061	11.729	11.7802	379.118	37.708	213.74
2FKHOW_W_3	Female	Khovd	Urban	Winter	3	38	Sunday	January	1.02814	120.378	16.1702	22.5706	154.695	2.13356	0.943566	198.228	7.45584	17.9709	5.92466	20.9678	379.896	9.66	126.36
3FKHOW_S_1	Female	Khovd	Urban	Summer	1	38	Sunday	July	0.974643	197.068	22.4873	25.6965	40.151	1.98341	1.68219	115.917	6.73024	10.902	10.6887	20.474	453.888	16.032	91.1535
3FKHOW_S_2	Female	Khovd	Urban	Summer	2	38	Monday	July	0.974643	200.54	24.681	29.8642	577.608	1.86173	0.969555	734.486	9.71612	53.3186	17.4627	30.0499	626.665	71.576	49.8016
3FKHOW_S_3	Female	Khovd	Urban	Summer	3	38	Tuesday	July	1.2183	100.265	10.5286	11.2901	55.9553	2.57102	1.35624	73.27	3.69695	8.0794	2.464	12.8826	213.109	46.078	130.073
3FKHOW_W_1	Female	Khovd	Urban	Winter	1	38	Friday	January	1.28518	94.4194	16.344	19.6495	22.5301	1.14486	0.534554	216.828	9.17966	8.7126	10.7361	24.1337	339.489	36.288	53.2583
3FKHOW_W_2	Female	Khovd	Urban	Winter	2	38	Saturday	January	1.28518	87.2457	10.2602	14.6918	4.86993	1.2459	0.716076	59.3138	5.53629	8.62035	2.2367	14.1269	195.474	2.464	0
3FKHOW_W_3	Female	Khovd	Urban	Winter	3	38	Sunday	January	1.02814	337.96	12.0451	17.7373	430.714	1.36621	1.37167	590.856	6.17031	20.9558	5.01214	11.6978	207.486	9.064	57.227
4FKHOW_S_1	Female	Khovd	Urban	Summer	1	40	Monday	July	0.974643	78.5367	13.1412	14.2353	184.318	1.23829	0.820445	231.597	4.81927	20.6104	7.2234	10.9823	277.871	10.388	138.877
4FKHOW_S_2	Female	Khovd	Urban	Summer	2	40	Tuesday	July	1.2183	42.2214	4.86935	6.77151	30.7333	0.523159	0.295155	237.828	3.30232	5.95696	1.28737	9.02676	0.00500015	10.8	21.5081
4FKHOW_S_3	Female	Khovd	Urban	Summer	3	40	Wedesday	July	1.2183	63.8643	8.39575	10.5182	229.871	1.21354	0.846241	232.649	3.31932	16.9974	1.26575	6.49024	159.477	0	163.487
4FKHOW_W_1	Female	Khovd	Urban	Winter	1	40	Friday	January	1.28518	155.124	11.3332	17.1319	312.663	1.12192	0.617634	421.487	7.83194	21.8006	6.66798	16.3596	244.389	20.48	72.3339
4FKHOW_W_2	Female	Khovd	Urban	Winter	2	40	Saturday	January	1.28518	113.145	8.19398	13.1314	74.9588	0.976833	0.569225	272.075	3.67908	9.982	3.0296	10.9252	74.0149	22.679	117.655
4FKHOW_W_3	Female	Khovd	Urban	Winter	3	40	Sunday	January	1.02814	143.999	13.7075	14.7374	55.5669	1.26005	0.709373	118.931	6.20327	10.2809	7.17883	16.6941	336.191	12.04	131.353
5FKHOW_S_1	Female	Khovd	Urban	Summer	1	45	Monday	July	0.838589	113.513	9.01096	9.08243	304.388	1.16725	0.58229	349.26	3.4032	3.80233	8.4795	9.85847	177.495	8.176	12.1233
5FKHOW_S_2	Female	Khovd	Urban	Summer	2	45	Tuesday	July	1.04824	113.346	11.8275	16.3128	154.743	1.04881	0.985377	194.175	3.48084	4.97238	4.16415	10.096	194.597	0	0
5FKHOW_S_3	Female	Khovd	Urban	Summer	3	45	Wedesday	July	1.04824	88.5997	5.63961	9.22048	167.107	1.40804	0.69391	246.027	3.84609	11.4229	0.99321	9.48053	37.5839	9.024	0
5FKHOW_W_1	Female	Khovd	Urban	Winter	1	45	Friday	January	1.06765	131.83	24.7469	49.2223	236.112	2.96752	0.75008	945.334	38.8891	12.1436	6.83	58.5634	52.8457	38.35	27.9902
5FKHOW_W_2	Female	Khovd	Urban	Winter	2	45	Saturday	January	1.06765	131.394	11.497	19.6011	67.0262	1.24742	0.644853	364.736	7.43756	20.3605	2.45373	19.2477	84.2516	15.5	39.7662
5FKHOW_W_3	Female	Khovd	Urban	Winter	3	45	Sunday	January	0.854118	135.699	14.9553	14.9522	108.61	1.27919	0.535622	198.429	6.9262	7.3716	3.59683	19.1539	304.096	52.35	31.366
6FKHOW_S_1	Female	Khovd	Urban	Summer	1	36	Monday	July	0.974643	106.819	9.20733	11.3055	39.0142	0.813042	0.719291	64.2802	2.59328	7.67407	2.32106	7.38114	167.103	6.16	53.8984
6FKHOW_S_2	Female	Khovd	Urban	Summer	2	36	Tuesday	July	1.2183	87.3184	8.2749	10.3938	42.3856	1.00556	0.883763	104.823	2.08579	5.74661	3.4052	6.81706	102.403	10.608	98.0669
6FKHOW_S_3	Female	Khovd	Urban	Summer	3	36	Wedesday	July	1.2183	30.1795	6.11515	7.0138	127.644	0.638812	0.47868	157.397	1.06517	12.6818	3.50389	4.84108	153.616	6.188	55.4347
6FKHOW_W_1	Female	Khovd	Urban	Winter	1	36	Friday	January	1.28518	39.1568	4.63566	5.84371	432.895	0.670571	0.196366	452.728	5.9441	20.6116	3.36161	8.59823	73.2967	4.424	92.9459
6FKHOW_W_2	Female	Khovd	Urban	Winter	2	36	Saturday	January	1.28518	317.053	28.4644	42.9728	856.396	3.49085	0.787938	908.054	20.6578	358.339	11.1725	47.5156	197.165	22.125	149.413
6FKHOW_W_3	Female	Khovd	Urban	Winter	3	36	Sunday	January	1.02814	176.201	31.8875	37.6913	484.095	2.74089	0.965984	548.328	19.4641	34.6589	8.57374	46.4939	500.299	6.864	70.4136
7FKHOW_S_1	Female	Khovd	Urban	Summer	1	37	Monday	July	0.974643	204.258	17.6273	27.8442	138.901	2.34025	0.680726	189.598	10.8999	20.8078	4.46616	23.0722	363.397	65.888	157.726
7FKHOW_S_2	Female	Khovd	Urban	Summer	2	37	Tuesday	July	1.2183	150.139	12.331	23.4259	71.7046	1.53987	0.444828	166.398	9.8574	15.3839	2.1133	23.9928	193.763	14.544	26.7572
7FKHOW_S_3	Female	Khovd	Urban	Summer	3	37	Wedesday	July	1.2183	131.241	16.7768	21.4895	19.2234	1.1374	0.456629	85.9391	7.95133	14.3719	2.97601	20.8669	339.788	81	28.2934
7FKHOW_W_1	Female	Khovd	Urban	Winter	1	37	Friday	January	1.28518	157.648	16.0798	16.5778	241.506	1.93477	1.19083	283.953	7.37607	9.46005	5.98322	13.2071	286.897	19.786	8.40224
7FKHOW_W_2	Female	Khovd	Urban	Winter	2	37	Saturday	January	1.28518	140.044	12.6924	18.4417	227.285	1.244	0.808946	570.993	8.96339	17.5885	5.37532	20.8708	64.5588	25.937	65.6766
7FKHOW_W_3	Female	Khovd	Urban	Winter	3	37	Sunday	January	1.02814	153.913	12.6482	13.4006	40.6072	1.15134	0.771579	164.881	4.69101	5.72645	5.30013	14.3356	216.842	11.88	86.4166
8FKHOW_S_1	Female	Khovd	Urban	Summer	1	33	Monday	July	0.974643	115.838	10.8788	14.4619	280.845	1.41279	0.517232	389.099	5.94661	72.0883	6.09628	15.2239	260.073	10.012	224.02
8FKHOW_S_2	Female	Khovd	Urban	Summer	2	33	Tuesday	July	1.2183	155.844	16.06	24.54	532.35	2.82083	1.04228	807.445	9.44903	48.4792	5.4174	26.5507	232.104	73.102	315.086
8FKHOW_S_3	Female	Khovd	Urban	Summer	3	33	Wedesday	July	1.2183	147.808	24.4116	30.3013	402.98	2.86964	1.29179	444.478	10.9754	74.8574	6.20811	31.4384	500.204	63	46.857
8FKHOW_W_1	Female	Khovd	Urban	Winter	1	33	Friday	January	1.28518	208.87	13.4008	14.4551	66.1161	1.2381	0.890688	108.848	3.97265	6.77579	4.77426	11.0418	235.517	11.792	63.0106
8FKHOW_W_2	Female	Khovd	Urban	Winter	2	33	Saturday	January	1.28518	94.0703	15.9785	15.3087	86.6135	1.61724	0.809245	175.403	5.94563	10.9035	9.08116	17.4579	448.525	15.904	178.571
8FKHOW_W_3	Female	Khovd	Urban	Winter	3	33	Sunday	January	1.02814	422.593	24.3811	19.5468	192.028	3.01529	1.5051	977.035	8.21834	26.4169	12.4836	20.8851	428.177	37.928	593
9FKHOW_S_1	Female	Khovd	Urban	Summer	1	35	Monday	July	0.974643	152.021	14.8256	32.8912	536.961	1.47943	0.841341	651.821	3.26092	19.7388	6.03432	11.5758	194.444	8.272	28.0374
9FKHOW_S_2	Female	Khovd	Urban	Summer	2	35	Tuesday	July	1.2183	326.118	16.7378	17.6413	822.037	1.90108	1.26622	874.905	7.37708	36.9938	11.5946	16.7809	358.544	32.208	46.4701
9FKHOW_S_3	Female	Khovd	Urban	Summer	3	35	Wedesday	July	1.2183	185.171	15.2099	23.183	293.094	1.62739	0.878528	537.419	9.85918	21.0762	7.37487	22.8102	202.299	23.25	0
10MKHOW_S_1	Male	Khovd	Urban	Summer	1	50	Monday	July	0.997193	150.588	16.3945	25.0608	376.728	1.46759	0.651409	490.128	10.6324	36.1735	10.6892	24.966	336.889	18.984	78.7352
10MKHOW_S_2	Male	Khovd	Urban	Summer	2	50	Tuesday	July	1.24649	116.118	11.2664	17.8242	672.182	1.97936	0.940036	776.388	10.4549	32.1555	2.95212	17.6096	151.159	10.032	130.201
10MKHOW_S_3	Male	Khovd	Urban	Summer	3	50	Wedesday	July	1.24649	121.686	12.5443	18.6701	33.5784	1.21282	0.709182	93.3223	6.01861	12.9681	5.42602	15.6202	245.432	10.472	79.3753
10MKHOW_W_1	Male	Khovd	Urban	Winter	1	50	Friday	January	1.33882	142.605	9.26637	20.6339	203.047	1.04446	0.691804	386.503	3.31829	20.6546	3.95605	10.991	70.4042	18.415	76.3027
10MKHOW_W_2	Male	Khovd	Urban	Winter	2	50	Saturday	January	1.33882	137.586	22.3919	33.0666	160.385	1.75576	0.602785	170.24	12.4473	31.6783	4.33175	34.4985	508.942	22.65	61.0942
10MKHOW_W_3	Male	Khovd	Urban	Winter	3	50	Sunday	January	1.07106	99.3776	12.6429	16.3212	0	0.899004	0.443193	164.028	6.5955	5.74721	7.36862	18.541	202.443	12.208	0
1MKHOW_S_1	Male	Khovd	Urban	Summer	1	26	Monday	July	0.723936	165.431	8.259	12.4947	82.7697	1.45303	0.733029	104.064	4.00825	4.383	2.21863	9.93854	126.225	0	0
1MKHOW_S_2	Male	Khovd	Urban	Summer	2	26	Tuesday	July	0.90492	186.546	23.8408	25.4848	14.8191	1.63751	1.14465	173.791	11.1292	5.42103	6.79645	29.5882	418.003	14.144	28.2934
1MKHOW_S_3	Male	Khovd	Urban	Summer	3	26	Wedesday	July	0.90492	213.025	40.4043	76.8089	25.0214	3.81169	1.78595	25.8231	26.7412	36.2221	5.50665	74.7893	526.774	0	59.1474
1MKHOW_W_1	Male	Khovd	Urban	Winter	1	26	Friday	January	0.915606	484.359	58.492	86.7948	1283.03	5.93841	2.24433	1364.13	24.3912	59.6795	12.2839	69.3901	1160.69	284.7	171.425
1MKHOW_W_2	Male	Khovd	Urban	Winter	2	26	Saturday	January	0.915606	263.653	11.9568	20.8215	446.602	2.0046	1.04712	618.254	6.98499	30.2942	5.99883	20.8614	61.1812	27.68	32.1298
1MKHOW_W_3	Male	Khovd	Urban	Winter	3	26	Sunday	January	0.732485	544.648	70.8018	89.4952	35.8556	5.68962	2.72525	35.8602	58.4879	3.25469	21.2746	134.96	247.663	33.528	57.7391
2MKHOW_S_1	Male	Khovd	Urban	Summer	1	28	Saturday	July	0.90492	161.767	9.5404	16.6674	268.724	1.18712	0.528617	315.822	7.86811	24.9477	1.97802	16.0403	106.481	0	54.1846
2MKHOW_S_2	Male	Khovd	Urban	Summer	2	28	Sunday	July	0.723936	192.384	16.7565	27.2716	95.1142	1.34576	0.543869	202.697	11.0668	18.7617	9.41925	26.7669	325.589	18.564	0
2MKHOW_S_3	Male	Khovd	Urban	Summer	3	28	Monday	July	0.723936	146.569	13.8624	28.2075	4.72	1.19733	0.440087	88.9446	11.5896	16.816	5.28578	28.4126	147.656	8.876	0
2MKHOW_W_1	Male	Khovd	Urban	Winter	1	28	Friday	January	0.915606	223.277	13.8998	12.7741	272.277	1.91618	0.898781	1075.4	5.83179	20.8234	7.98936	15.0619	166.015	19.536	86.4166
2MKHOW_W_2	Male	Khovd	Urban	Winter	2	28	Saturday	January	0.915606	60.8206	4.99408	3.78951	220.667	1.19443	0.323232	729.82	2.18968	18.8641	3.11907	5.66855	74.4485	3.784	142.747
2MKHOW_W_3	Male	Khovd	Urban	Winter	3	28	Sunday	January	0.732485	43.4167	4.92278	6.82998	141.287	0.695035	0.251369	182.381	3.00343	16.8587	1.78701	7.29144	85.8118	1.76	140.571
3MKHOW_S_1	Male	Khovd	Urban	Summer	1	51	Monday	July	0.997193	194.744	17.9281	28.1586	202.23	1.75736	1.30982	281.768	9.57822	25.5978	5.464	22.5237	175.8	20.248	134.877
3MKHOW_S_2	Male	Khovd	Urban	Summer	2	51	Tuesday	July	1.24649	88.2011	9.61739	11.8533	176.02	1.00779	0.862789	189.691	2.35658	20.3609	2.13404	6.73057	191.497	3.432	100.627
3MKHOW_S_3	Male	Khovd	Urban	Summer	3	51	Wedesday	July	1.24649	88.5733	7.63571	15.5224	20.472	0.771317	0.387503	290.302	6.01853	11.2512	1.69386	14.6928	72.0793	28.068	48.3933
4MKHOW_S_1	Male	Khovd	Urban	Summer	1	27	Monday	July	0.723936	202.264	24.5866	32.7826	2055	2.68836	0.836098	2169.12	36.8597	22.6758	13.4622	26.9768	470.154	29.02	34.6947
4MKHOW_S_2	Male	Khovd	Urban	Summer	2	27	Tuesday	July	0.90492	63.4992	10.0053	12.9126	744.392	1.03195	0.448456	793.396	9.81249	36.1333	7.04918	14.2978	235.292	10.92	100.499
4MKHOW_S_3	Male	Khovd	Urban	Summer	3	27	Wedesday	July	0.90492	70.1995	7.12321	10.5626	58.7081	0.943052	0.407992	100.111	3.89385	12.6881	0.906757	9.83869	116.676	28.5	138.779
4MKHOW_W_1	Male	Khovd	Urban	Winter	1	27	Friday	January	0.915606	140.037	13.4825	28.2204	56.4575	1.46039	0.751853	530.257	9.92751	27.6877	2.71979	26.8596	165.596	22.45	89.1222
4MKHOW_W_2	Male	Khovd	Urban	Winter	2	27	Saturday	January	0.915606	60.3177	7.78083	12.3717	34.9459	1.04121	0.726605	408.189	4.4967	15.4457	2.03675	8.99637	88.7474	0	79.2473
4MKHOW_W_3	Male	Khovd	Urban	Winter	3	27	Sunday	January	0.732485	436.284	23.626	23.7958	183.03	1.74284	1.43046	209.237	6.85824	24.9988	11.2189	18.7484	501.58	41.976	156.19
5MKHOW_S_1	Male	Khovd	Urban	Summer	1	49	Monday	July	0.997193	216.934	21.1045	28.6843	59.0898	2.40483	3.22492	334.327	5.44028	8.37589	7.65182	17.0144	299.785	13.045	116.886
5MKHOW_S_2	Male	Khovd	Urban	Summer	2	49	Tuesday	July	1.24649	176.726	20.5926	25.7202	126.634	1.89107	0.747293	261.833	10.3306	30.7647	14.4984	25.7056	532.067	34.692	356.232
5MKHOW_S_3	Male	Khovd	Urban	Summer	3	49	Wedesday	July	1.24649	187.789	26.6753	35.9629	11446.3	7.41605	0.82162	11466.4	123.084	30.7297	4.1937	33.1459	319.946	68.25	207.158
5MKHOW_W_1	Male	Khovd	Urban	Winter	1	49	Friday	January	1.33882	304.082	16.2524	28.2851	48.0396	1.481	1.20851	166.981	8.30866	16.3965	2.88745	22.1669	351.207	12.416	0
5MKHOW_W_2	Male	Khovd	Urban	Winter	2	49	Saturday	January	1.33882	97.0105	10.1849	16.2346	120.325	0.95922	0.580482	352.337	7.47886	12.1364	2.49441	20.0271	131.125	36.312	27.7813
5MKHOW_W_3	Male	Khovd	Urban	Winter	3	49	Sunday	January	1.07106	110.506	13.7009	21.3405	124.575	1.05279	0.745903	199.534	6.77486	21.4859	2.27518	17.8617	244.308	7.2	0
6MKHOW_S_1	Male	Khovd	Urban	Summer	1	46	Wedesday	July	1.24649	432.044	45.421	66.5314	6381.88	7.95952	2.16439	6840.73	114.709	36.9599	14.4334	49.1714	49.8277	6.468	145.564
6MKHOW_S_2	Male	Khovd	Urban	Summer	2	46	Thursday	July	1.24649	303.051	33.3871	48.2445	4630.81	5.75464	1.64478	4725.06	80.402	54.3112	8.92296	34.4883	94.8307	12.584	348.483
6MKHOW_S_3	Male	Khovd	Urban	Summer	3	46	Friday	July	1.24649	170.706	16.1142	15.187	162.833	2.02877	0.800482	191.223	6.82531	10.231	5.72824	20.589	336.488	11.919	152.861
6MKHOW_W_1	Male	Khovd	Urban	Winter	1	46	Friday	January	1.33882	148.246	14.3737	21.0217	35.2055	1.21404	0.595618	275.212	8.91386	17.2382	3.52823	23.0604	208.656	16.9	57.6111
6MKHOW_W_2	Male	Khovd	Urban	Winter	2	46	Saturday	January	1.33882	73.4216	9.6426	13.5636	23.5049	0.779683	0.286274	82.5917	6.32943	9.69174	1.31135	12.6947	130.799	9.072	55.5627
6MKHOW_W_3	Male	Khovd	Urban	Winter	3	46	Sunday	January	1.07106	54.3654	11.6297	12.5027	155.678	1.13149	0.885793	225.998	4.04455	16.5821	1.76304	5.95104	124.483	7.056	128.409
7MKHOW_S_1	Male	Khovd	Urban	Summer	1	30	Monday	July	0.723936	218.043	28.9702	51.8416	22.54	2.19407	0.763518	171.836	21.4617	32.9725	15.3759	52.1677	494.893	29.82	27.3973
7MKHOW_S_2	Male	Khovd	Urban	Summer	2	30	Tuesday	July	0.90492	145.179	9.66502	18.5698	3.63994	0.879566	0.350752	79.3057	4.91863	7.50891	3.86746	12.8757	207.092	5.936	0
7MKHOW_S_3	Male	Khovd	Urban	Summer	3	30	Wedesday	July	0.90492	204.676	21.5336	25.8325	253.801	2.04333	2.45315	290.82	1.41832	19.461	2.99314	8.03777	409.595	0	0
7MKHOW_W_1	Male	Khovd	Urban	Winter	1	30	Friday	January	0.915606	227.169	20.4148	26.4431	30.2336	1.40079	0.655788	59.7377	10.0141	18.4812	4.77699	25.8281	431.593	91.25	62.6041
7MKHOW_W_2	Male	Khovd	Urban	Winter	2	30	Saturday	January	0.915606	348.743	20.2312	23.8579	18.9846	1.56202	0.701821	113.707	8.3675	14.7032	12.9388	22.6092	509.509	34.224	34.3106
7MKHOW_W_3	Male	Khovd	Urban	Winter	3	30	Sunday	January	0.732485	382.142	25.5638	27.4413	430.847	2.45549	2.41942	547.755	3.00842	4.8203	9.25485	16.6641	464.424	84.808	22.7884
8MKHOW_S_1	Male	Khovd	Urban	Summer	1	27	Monday	July	0.723936	93.7166	10.9209	14.2952	345.208	1.71834	0.727454	406.597	4.95399	16.8517	6.26319	14.4682	237.262	8.624	65.2926
8MKHOW_S_2	Male	Khovd	Urban	Summer	2	27	Tuesday	July	0.90492	83.651	9.70924	14.9527	0	4.44331	2.95113	70.5632	2.20715	0.207614	3.31768	11.8888	129.683	5.348	0
8MKHOW_S_3	Male	Khovd	Urban	Summer	3	27	Wedesday	July	0.90492	91.1277	15.9878	20.3056	738.554	2.25152	1.1921	836.8	6.37725	56.3928	6.90691	16.5897	255.453	7.168	252.209
9MKHOW_S_1	Male	Khovd	Urban	Summer	1	31	Monday	July	0.723936	76.9044	5.64057	11.5829	86.75	0.573533	0.243556	107.992	7.41134	112.521	5.94159	8.56237	49.4848	13.3	0
9MKHOW_S_2	Male	Khovd	Urban	Summer	2	31	Tuesday	July	0.90492	115.202	17.7742	33.1684	93.4709	2.32671	1.49099	129.984	8.56432	71.2975	6.1927	21.837	375.404	98.5	0
9MKHOW_S_3	Male	Khovd	Urban	Summer	3	31	Wedesday	July	0.90492	64.6714	3.22617	8.50675	0	0.40941	0.180154	84.0737	2.89863	4.03343	0.566894	7.58718	0	12.96	0
9MKHOW_W_1	Male	Khovd	Urban	Winter	1	31	Friday	January	0.915606	188.835	17.5032	49.6461	219.116	1.53844	1.01037	229.601	24.7489	223.707	5.24952	26.3487	214.621	2.2	93.458
9MKHOW_W_2	Male	Khovd	Urban	Winter	2	31	Saturday	January	0.915606	132.246	25.5325	31.2452	3.74058	1.83508	0.847192	106.597	18.1521	6.00653	5.84648	40.9886	261.544	0	0
9MKHOW_W_3	Male	Khovd	Urban	Winter	3	31	Sunday	January	0.732485	69.2969	23.5507	22.6968	2.46157	2.95024	1.80199	58.3153	12.441	4.6547	3.1456	15.8208	256.54	0	0
10FWOW_S_1	Female	Khuvsgul	Urban	Summer	1	33	Friday	July	1.2183	111.273	10.0098	9.67344	201.26	0.797767	0.70446	237.531	1.95461	21.905	3.07121	7.0977	281.32	0	75.2785
10FWOW_S_2	Female	Khuvsgul	Urban	Summer	2	33	Saturday	July	1.2183	51.0382	6.98087	7.46364	79.4253	0.772274	0.247178	99.9898	3.6648	10.186	7.26356	9.25527	117.677	3.78	102.676
10FWOW_S_3	Female	Khuvsgul	Urban	Summer	3	33	Sunday	July	0.974643	193.406	18.3456	33.4879	28.0001	1.63663	0.776221	119.162	10.4871	19.0135	8.189	26.6367	311.51	59.32	66.1887
10FWOW_W_1	Female	Khuvsgul	Urban	Winter	1	33	Sunday	February	1.02814	81.7328	11.4274	14.0504	90.8121	0.888221	0.739511	98.1731	5.78261	327.212	3.10259	9.61619	111.869	6.017	6.66292
10FWOW_W_2	Female	Khuvsgul	Urban	Winter	2	33	Monday	February	1.02814	74.1804	7.91643	9.29646	0	0.4738	0.381351	79.8678	3.42033	5.22767	2.82304	9.89285	111.25	32.892	0
10FWOW_W_3	Female	Khuvsgul	Urban	Winter	3	33	Tuesday	February	1.28518	80.4542	4.3802	7.81355	21.56	0.48635	0.27527	108.68	0.902	2.64	2.28334	4.2657	0	0	0
1FWOW_S_1	Female	Khuvsgul	Urban	Summer	1	52	Friday	July	1.04824	136.167	13.703	28.4437	360.494	2.96542	1.2469	368.703	13.2419	103.645	7.0272	29.4945	23.588	14.336	187.788
1FWOW_S_2	Female	Khuvsgul	Urban	Summer	2	52	Saturday	July	1.04824	144.648	14.848	23.8951	3051.64	3.64108	0.721076	3081.31	47.8494	31.9095	3.57815	20.3226	2.3968	0	78.7352
1FWOW_S_3	Female	Khuvsgul	Urban	Summer	3	52	Sunday	July	0.838589	56.5341	6.69083	12.3257	214.597	2.45301	1.44107	324.816	4.73337	23.7047	1.96203	12.1241	52.2228	11.472	110.101
1FWOW_W_1	Female	Khuvsgul	Urban	Winter	1	52	Sunday	February	0.854118	102.829	13.2903	14.5208	298.7	1.59633	0.984693	309.43	4.92777	30.5939	2.92643	13.2063	259.401	0	195.011
1FWOW_W_2	Female	Khuvsgul	Urban	Winter	2	52	Monday	February	0.854118	78.663	13.9891	25.7401	165.946	1.54481	0.679387	190.316	9.50084	24.8597	4.03463	24.923	117.948	4.62	172.833
1FWOW_W_3	Female	Khuvsgul	Urban	Winter	3	52	Tuesday	February	1.06765	47.0486	5.67797	6.81833	264.546	1.10192	0.374029	296.568	3.72478	48.9566	1.71335	7.36564	86.5971	1.75	202.407
2FWOW_S_1	Female	Khuvsgul	Urban	Summer	1	51	Friday	July	1.04824	266.075	14.7858	14.9607	228.753	1.25136	0.731096	269.818	6.05241	64.0665	5.64865	13.7497	374.208	56.3	28.1654
2FWOW_S_2	Female	Khuvsgul	Urban	Summer	2	51	Saturday	July	1.04824	97.3512	7.08723	7.75971	344.929	1.46672	0.605666	380.366	3.6965	23.7068	3.16259	8.52682	112.119	4.4	154.142
2FWOW_S_3	Female	Khuvsgul	Urban	Summer	3	51	Sunday	July	0.838589	76.0158	9.54088	13.9369	263.025	1.07991	0.538895	326.813	5.2072	33.0392	1.84887	13.6709	182.941	39.9	143.5
2FWOW_W_1	Female	Khuvsgul	Urban	Winter	1	51	Sunday	February	0.854118	82.9386	8.47637	11.9244	199.32	0.630642	0.262616	245.844	4.54757	21.0228	5.16815	12.1832	206.711	7.7	0
2FWOW_W_2	Female	Khuvsgul	Urban	Winter	2	51	Monday	February	0.854118	139.657	6.75276	7.00373	211.55	0.714283	0.458678	273.631	2.41386	14.1119	4.76807	7.29621	50.722	14.792	0
2FWOW_W_3	Female	Khuvsgul	Urban	Winter	3	51	Tuesday	February	1.06765	72.5462	2.89228	3.9882	158.671	0.358049	0.141247	190.02	1.41832	12.9264	1.3776	4.20347	44.3969	0	0
3FWOW_S_1	Female	Khuvsgul	Urban	Summer	1	54	Friday	July	1.04824	63.0038	4.92082	8.7747	223.382	0.946562	0.360558	341.405	4.53655	11.5045	2.08648	9.39506	57.9428	0	6.12949
3FWOW_S_2	Female	Khuvsgul	Urban	Summer	2	54	Saturday	July	1.04824	86.5545	12.4908	14.8839	615.362	1.48514	0.999591	658.588	3.91972	39.9098	2.14104	9.61589	181.211	23.67	0
3FWOW_S_3	Female	Khuvsgul	Urban	Summer	3	54	Sunday	July	0.838589	106.335	8.36893	9.0992	109.989	0.834765	0.490319	161.454	1.9455	11.6939	1.87143	5.66543	80.0843	0	0
3FWOW_W_1	Female	Khuvsgul	Urban	Winter	1	54	Sunday	February	0.854118	37.9765	4.62517	9.19336	310.659	0.620511	0.301724	401.17	2.97676	26.1265	2.54654	8.10908	24.605	0	25.6049
3FWOW_W_2	Female	Khuvsgul	Urban	Winter	2	54	Monday	February	0.854118	67.1342	14.1128	15.739	19.9895	0.991427	0.545709	91.0608	6.4883	6.36001	2.44389	11.3952	198.489	0	22.1483
3FWOW_W_3	Female	Khuvsgul	Urban	Winter	3	54	Tuesday	February	1.06765	55.7386	12.3848	11.1947	219.543	1.18196	0.664905	750.149	4.22133	17.6892	3.68539	6.88048	149.396	0	31.4941
4FWOW_S_1	Female	Khuvsgul	Urban	Summer	1	40	Friday	July	1.2183	115.32	9.22018	25.6044	334.793	2.31548	2.07159	383.198	1.96814	24.4616	4.0563	8.08813	180.746	20.425	79.6313
4FWOW_S_2	Female	Khuvsgul	Urban	Summer	2	40	Saturday	July	1.2183	132.244	11.6966	20.7278	350.062	1.55249	0.860338	894.499	7.8422	69.0895	6.28713	18.9837	112.616	8.275	115.734
4FWOW_S_3	Female	Khuvsgul	Urban	Summer	3	40	Sunday	July	0.974643	85.2346	11.7578	16.1332	50.8112	1.97039	1.38751	197.596	3.92789	11.562	2.35509	12.5691	125.635	0	41.352
4FWOW_W_1	Female	Khuvsgul	Urban	Winter	1	40	Sunday	February	1.02814	145.662	14.0179	13.2306	31.0501	1.28173	0.799863	112.784	5.18365	9.35797	2.56738	10.8388	229.296	0	63.8772
4FWOW_W_2	Female	Khuvsgul	Urban	Winter	2	40	Monday	February	1.02814	131.88	13.6809	23.8844	23.8299	1.21118	0.475854	82.4539	8.684	16.6567	1.82235	22.172	221.512	8.976	56.3308
4FWOW_W_3	Female	Khuvsgul	Urban	Winter	3	40	Tuesday	February	1.28518	219.152	11.5626	9.08951	120.394	5.06018	0.721132	174.741	3.53349	7.89436	2.70877	6.18132	340.021	0	90.7695
5FWOW_S_1	Female	Khuvsgul	Urban	Summer	1	34	Friday	July	1.2183	98.3246	11.0103	17.6478	178.479	0.733804	1.03128	293.146	6.25377	0.277999	2.13012	26.6762	56.1267	0	0
5FWOW_S_2	Female	Khuvsgul	Urban	Summer	2	34	Saturday	July	1.2183	105.12	7.02421	14.6445	288.217	1.30427	0.978125	289.777	4.23762	2.92	1.96551	23.5944	0	1.825	0
5FWOW_S_3	Female	Khuvsgul	Urban	Summer	3	34	Sunday	July	0.974643	74.0613	9.14776	14.8055	170.032	0.551186	0.884515	201.46	4.82088	0.331906	0.981207	23.3453	62.5648	0	0
6FWOW_S_1	Female	Khuvsgul	Urban	Summer	1	27	Friday	July	1.82429	272.206	23.8602	20.4765	130.553	2.04788	1.07604	206.424	8.4628	16.6986	13.4259	23.5299	586.773	68.15	233.99
6FWOW_S_2	Female	Khuvsgul	Urban	Summer	2	27	Saturday	July	1.82429	202.689	19.1058	20.1754	259.269	1.70454	1.03741	367.285	6.12699	27.2268	8.93481	18.3923	393.556	33.004	123.288
6FWOW_S_3	Female	Khuvsgul	Urban	Summer	3	27	Sunday	July	1.45943	305.487	31.6814	47.1104	283.512	2.21307	0.980451	360.717	18.1144	53.6681	7.4279	47.1561	611.616	12.904	0
6FWOW_W_1	Female	Khuvsgul	Urban	Winter	1	27	Sunday	February	1.41079	365.048	12.06	7.23733	300.28	9.17519	1.03857	1257.08	4.14879	104.922	6.44546	10.4772	415.899	8.28	142.235
6FWOW_W_2	Female	Khuvsgul	Urban	Winter	2	27	Monday	February	1.41079	124.607	10.07	9.93703	489.558	1.09524	0.57668	615.605	5.00871	67.7569	6.51353	13.9528	128.374	12.4	86.5771
6FWOW_W_3	Female	Khuvsgul	Urban	Winter	3	27	Tuesday	February	1.76348	68.7543	12.0039	17.0731	38.9368	0.894497	0.39094	134.325	7.65911	15.0968	3.98848	19.4055	208.763	14.308	49.2206
7FWOW_S_1	Female	Khuvsgul	Urban	Summer	1	24	Friday	July	1.82429	112.588	8.85767	10.457	535.777	2.11733	1.42965	586.051	2.73931	93.276	3.55743	7.34121	135.432	0	0
7FWOW_S_2	Female	Khuvsgul	Urban	Summer	2	24	Saturday	July	1.82429	149.696	17.1099	16.9787	586.832	2.55473	1.66287	607.137	8.49375	30.2218	9.49896	15.9553	312.456	36.45	0
7FWOW_S_3	Female	Khuvsgul	Urban	Summer	3	24	Sunday	July	1.45943	83.2864	8.732	12.0198	121.561	2.1132	1.44801	148.904	3.21394	15.743	1.52442	8.78504	162.511	0	0
7FWOW_W_1	Female	Khuvsgul	Urban	Winter	1	24	Sunday	February	1.41079	79.6472	12.4232	17.7443	37.4779	1.03196	0.431562	75.4136	6.75734	15.3234	4.88597	17.0206	298.403	8.12	88.5931
7FWOW_W_2	Female	Khuvsgul	Urban	Winter	2	24	Monday	February	1.41079	207.967	15.3358	12.667	246.991	1.28868	0.883979	333.668	5.2487	15.0609	3.85415	12.1239	251.795	57.348	143.516
7FWOW_W_3	Female	Khuvsgul	Urban	Winter	3	24	Tuesday	February	1.76348	106.85	9.49361	8.10879	28.4796	0.843344	0.83777	28.4844	0.485442	3.43511	2.79938	2.61871	113.584	6.16	60.9397
8FWOW_S_1	Female	Khuvsgul	Urban	Summer	1	35	Friday	July	1.2183	206.43	31.9444	43.0306	15.95	2.55492	1.67158	16.4301	17.5196	13.1314	4.89525	43.6708	446.66	0	0
8FWOW_S_2	Female	Khuvsgul	Urban	Summer	2	35	Saturday	July	1.2183	364.841	44.1089	88.1698	213.913	3.93611	2.41439	1579.78	31.4333	63.8979	7.05246	78.2676	263.761	0	0
8FWOW_S_3	Female	Khuvsgul	Urban	Summer	3	35	Sunday	July	0.974643	116.946	10.7574	13.4117	250.435	0.996931	0.971678	290.793	2.13562	23.6656	2.2189	6.98277	196.779	0	0
8FWOW_W_1	Female	Khuvsgul	Urban	Winter	1	35	Sunday	February	1.02814	103.625	7.62307	13.4676	64.147	1.17347	0.682857	124.648	3.26954	4.89484	1.63836	10.0752	126.877	0	0
8FWOW_W_2	Female	Khuvsgul	Urban	Winter	2	35	Monday	February	1.02814	91.176	15.8979	26.1192	86.4953	1.62935	0.849334	251.78	12.0098	9.41669	3.61672	29.0326	30.9871	24.12	32.0062
8FWOW_W_3	Female	Khuvsgul	Urban	Winter	3	35	Tuesday	February	1.28518	59.501	7.52325	9.47315	15.1515	0.851018	0.630372	33.4672	1.78211	2.33959	1.46662	7.34655	92.5073	0	35.9875
9FWOW_S_1	Female	Khuvsgul	Urban	Summer	1	37	Friday	July	1.2183	107.798	14.7436	19.0129	637.242	2.04912	1.21352	693.811	5.08623	16.2131	10.8613	13.1264	277.675	37.362	136.986
9FWOW_S_2	Female	Khuvsgul	Urban	Summer	2	37	Saturday	July	1.2183	152.933	19.08	23.0378	328.739	1.9818	1.18432	365.853	7.13266	33.4526	6.68437	18.7852	387.973	19.324	79.5033
9FWOW_S_3	Female	Khuvsgul	Urban	Summer	3	37	Sunday	July	0.974643	163.916	17.3271	19.5612	790.245	2.17455	1.98773	858.389	2.27682	28.1833	12.2398	7.73661	281.343	4.824	107.075
10MWOW_S_1	Male	Khuvsgul	Urban	Summer	1	29	Friday	July	0.90492	86.3762	11.6081	40.1789	1.42578	2.89584	2.30625	91.011	5.17754	8.01255	6.69636	13.7166	259.012	13.328	0
10MWOW_S_2	Male	Khuvsgul	Urban	Summer	2	29	Saturday	July	0.90492	100.016	15.3033	21.3146	4.26057	3.88786	2.38051	122.296	7.70019	11.8201	7.49731	20.0623	338.326	13.524	0
10MWOW_S_3	Male	Khuvsgul	Urban	Summer	3	29	Sunday	July	0.723936	176.814	24.2332	45.4097	4843.07	4.58806	1.35359	5016.04	62.5461	20.4889	4.14049	29.9365	20.0538	10.944	20.868
10MWOW_W_1	Male	Khuvsgul	Urban	Winter	1	29	Sunday	February	0.732485	362.566	34.7908	59.104	24.551	2.6297	0.963961	230.537	22.3702	73.6134	16.1778	53.6189	712.112	35.786	32.0062
10MWOW_W_2	Male	Khuvsgul	Urban	Winter	2	29	Monday	February	0.732485	53.0366	12.1605	11.4263	30.0232	0.89381	0.577157	107.603	4.81907	4.35564	5.6635	12.9859	267.166	8.456	64.0123
10MWOW_W_3	Male	Khuvsgul	Urban	Winter	3	29	Tuesday	February	0.915606	75.1211	9.34623	14.6535	0	0.635789	0.180308	0.368234	6.05158	10.0717	1.41741	15.1019	208.729	0	0
1MWOW_S_1	Male	Khuvsgul	Urban	Summer	1	27	Friday	July	0.90492	316.948	18.5287	48.255	203.1	2.57598	1.32145	228.096	15.055	157.197	3.22669	25.9237	145.335	7.175	65.6766
1MWOW_S_2	Male	Khuvsgul	Urban	Summer	2	27	Saturday	July	0.90492	165.651	14.0722	21.9332	14.7046	1.20822	0.83226	169.513	7.07052	9.99172	3.1166	19.0857	298.655	0	32.7743
1MWOW_S_3	Male	Khuvsgul	Urban	Summer	3	27	Sunday	July	0.723936	29.3919	5.58346	7.71666	44.899	1.44082	0.78356	131.444	3.35643	6.46714	1.2242	9.64635	92.2101	11.4	106.37
2MWOW_S_1	Male	Khuvsgul	Urban	Summer	1	29	Friday	July	0.90492	93.4372	21.4256	28.5852	130.442	2.30949	0.783105	2772.79	9.37936	16.0813	4.16404	22.7542	192.054	13.208	92.4338
2MWOW_S_2	Male	Khuvsgul	Urban	Summer	2	29	Saturday	July	0.90492	287.954	12.9377	31.4126	89.4739	1.92116	1.13523	1705.6	6.01897	33.7127	6.50632	17.4844	131.73	13.102	85.7765
2MWOW_S_3	Male	Khuvsgul	Urban	Summer	3	29	Sunday	July	0.723936	228.977	10.8014	28.3686	682.499	4.59203	1.92774	1001.9	9.6371	43.5285	5.6308	29.5726	14.6577	8.232	91.4096
2MWOW_W_1	Male	Khuvsgul	Urban	Winter	1	29	Sunday	February	0.732485	342.104	14.4936	7.88931	57.1904	6.85374	1.15086	574.084	1.50877	7.07371	5.81396	7.68084	450.231	6.072	123.491
2MWOW_W_2	Male	Khuvsgul	Urban	Winter	2	29	Monday	February	0.732485	158.509	14.6846	11.756	176.88	0.812679	0.662777	263.159	4.86328	17.1177	10.082	14.0697	332.837	22.82	8.69658
2MWOW_W_3	Male	Khuvsgul	Urban	Winter	3	29	Tuesday	February	0.915606	298.351	22.2202	27.2426	240.71	2.35524	1.71646	243.799	13.3367	103.613	6.53132	25.0032	273.151	27.906	8.50927
3MWOW_S_1	Male	Khuvsgul	Urban	Summer	1	53	Friday	July	1.24649	182.056	23.0788	29.2649	5.41797	1.62493	1.25331	140.059	8.59493	11.093	8.58401	23.6774	507.774	13.748	0
3MWOW_S_2	Male	Khuvsgul	Urban	Summer	2	53	Saturday	July	1.24649	78.0569	15.0658	17.5996	143.26	1.38459	0.843214	247.379	6.7075	12.9676	4.5871	17.3076	272.166	0	152.733
3MWOW_S_3	Male	Khuvsgul	Urban	Summer	3	53	Sunday	July	0.997193	85.0159	19.7411	17.4216	64.0496	1.48798	0.830506	187.072	7.87434	9.24713	10.9808	21.1239	449.733	18.368	143.772
3MWOW_W_1	Male	Khuvsgul	Urban	Winter	1	53	Sunday	February	1.07106	117.775	18.1461	28.0668	17.9399	1.64627	0.531337	125.266	14.8343	50.7939	2.84674	28.224	181.693	0	28.5495
3MWOW_W_2	Male	Khuvsgul	Urban	Winter	2	53	Monday	February	1.07106	189.536	14.6581	25.982	143.471	1.63898	0.949507	505.074	10.1654	27.4252	4.18982	24.4892	142.947	17.248	176.546
3MWOW_W_3	Male	Khuvsgul	Urban	Winter	3	53	Tuesday	February	1.33882	155.175	13.1399	15.4528	77.561	1.29885	0.638993	147.194	5.23481	15.8699	8.62034	14.567	378.634	22.544	175.577
4MWOW_S_1	Male	Khuvsgul	Urban	Summer	1	35	Friday	July	2.69781	153.658	11.766	21.3284	1046.48	2.31569	1.18132	1130.16	10.6448	29.9482	7.71249	13.8914	230.107	11.684	0
4MWOW_S_2	Male	Khuvsgul	Urban	Summer	2	35	Saturday	July	2.69781	46.7269	6.74714	5.65759	371.705	0.560261	0.311493	436.035	2.8803	25.7946	6.88199	8.34038	164.595	9.856	24.8368
4MWOW_S_3	Male	Khuvsgul	Urban	Summer	3	35	Sunday	July	2.15825	44.0373	7.26338	8.6319	226.327	0.584293	0.583417	256.58	2.64667	18.7052	2.20868	7.65056	123.171	0	0
4MWOW_W_1	Male	Khuvsgul	Urban	Winter	1	35	Sunday	February	2.45861	190.916	16.657	21.2848	342.232	1.51001	0.970485	366.905	7.02019	30.4164	4.14386	19.6402	303.38	10.65	2.28603
4MWOW_W_2	Male	Khuvsgul	Urban	Winter	2	35	Monday	February	2.45861	148.83	15.2087	18.8561	163.491	1.1579	0.636841	233.836	6.91309	19.2503	6.22807	18.8318	334.921	7.728	0
4MWOW_W_3	Male	Khuvsgul	Urban	Winter	3	35	Tuesday	February	3.07327	175.398	16.1774	16.5087	151.588	1.28425	1.27084	334.273	2.43172	13.7166	4.91942	9.16919	217	0	0
5MWOW_S_1	Male	Khuvsgul	Urban	Summer	1	41	Friday	July	2.69781	124.071	12.3423	14.3686	236.513	1.24906	1.26465	339.867	5.10754	34.178	7.49312	14.5821	207.486	13.512	128.153
5MWOW_S_2	Male	Khuvsgul	Urban	Summer	2	41	Saturday	July	2.69781	125.429	15.5772	18.8037	27.5126	1.19753	0.971596	86.461	4.08826	10.3489	7.0421	14.5664	304.083	7.884	34.1826
5MWOW_S_3	Male	Khuvsgul	Urban	Summer	3	41	Sunday	July	2.15825	176.49	14.2052	17.1223	334.562	1.62048	0.718629	405.285	6.24396	63.9036	3.23074	16.2817	209.937	55.925	34.1826
5MWOW_W_1	Male	Khuvsgul	Urban	Winter	1	40	Sunday	February	2.45861	152.788	9.97325	14.858	304.392	1.28101	0.651133	440.553	6.08158	17.8659	4.91992	15.0516	212.75	5.012	52.3984
5MWOW_W_2	Male	Khuvsgul	Urban	Winter	2	40	Monday	February	2.45861	212.544	16.6498	23.9501	22.438	1.39158	0.90567	86.5312	6.10288	8.15343	6.01381	11.266	317.721	11.6	7.03754
5MWOW_W_3	Male	Khuvsgul	Urban	Winter	3	40	Tuesday	February	3.07327	197.798	15.4825	24.4595	227.094	1.51822	0.721045	408.088	9.22393	64.2678	4.57249	24.0817	219.424	0	65.5487
6MWOW_S_1	Male	Khuvsgul	Urban	Summer	1	26	Friday	July	0.90492	167.282	11.5941	22.0879	175.207	1.65104	0.651494	390.533	7.27943	42.3742	5.11089	20.3217	156.706	10.8	36.8711
6MWOW_S_2	Male	Khuvsgul	Urban	Summer	2	26	Saturday	July	0.90492	184.205	20.3869	30.2782	53.1989	1.80005	1.14295	182.306	5.915	16.1998	13.7961	20.5012	528.021	26.712	0
6MWOW_S_3	Male	Khuvsgul	Urban	Summer	3	26	Sunday	July	0.723936	128.95	16.1481	24.7738	38.1536	1.86227	1.86205	236.364	2.76757	5.15652	2.9085	13.7754	263.634	0	91.6342
6MWOW_W_1	Male	Khuvsgul	Urban	Winter	1	26	Sunday	February	0.732485	149.6	18.9792	25.4481	0.51	2.86501	1.943	219.937	7.82372	11.7774	10.0876	21.3102	365.227	17.752	0
6MWOW_W_2	Male	Khuvsgul	Urban	Winter	2	26	Monday	February	0.732485	122.021	18.6262	15.6809	201.24	1.54864	0.72511	1266.74	5.88459	1.0329	7.61966	19.8283	293.496	29.1	0
6MWOW_W_3	Male	Khuvsgul	Urban	Winter	3	26	Tuesday	February	0.915606	118.427	21.0162	30.1893	50.0265	1.60302	0.930333	76.5357	10.4269	36.0856	3.2693	24.7062	416.875	77.7	5.64609
7MWOW_S_1	Male	Khuvsgul	Urban	Summer	1	45	Friday	July	1.24649	127.813	13.2998	15.376	245.431	2.14609	0.98761	358.239	5.55795	47.6002	9.83438	16.8111	311.881	26.418	28.1654
7MWOW_S_2	Male	Khuvsgul	Urban	Summer	2	45	Saturday	July	1.24649	56.6958	6.18953	8.45675	337.638	1.1381	0.581875	380.303	3.14035	26.8586	2.19656	7.67031	106.827	0	127.052
7MWOW_S_3	Male	Khuvsgul	Urban	Summer	3	45	Sunday	July	0.997193	48.5126	5.87969	7.72487	278.239	1.00739	0.266578	293.043	3.3104	21.8975	1.97235	9.58805	122.467	33.15	81.9358
7MWOW_W_1	Male	Khuvsgul	Urban	Winter	1	45	Sunday	February	1.07106	82.3408	26.922	21.7939	59.5747	1.43576	0.609696	186.934	12.1386	12.2277	14.0612	16.5659	536.345	28.392	140.827
7MWOW_W_2	Male	Khuvsgul	Urban	Winter	2	45	Monday	February	1.07106	251.457	23.1151	40.802	332.744	2.60539	1.14807	421.397	17.2342	120.559	10.4204	39.6594	146.726	16.296	103.805
7MWOW_W_3	Male	Khuvsgul	Urban	Winter	3	45	Tuesday	February	1.33882	85.6669	16.6815	13.4664	115.071	1.04336	0.451887	140.538	7.57656	22.6251	5.0155	19.3456	329.57	83.4	48.6501
8MWOW_S_1	Male	Khuvsgul	Urban	Summer	1	28	Friday	July	0.90492	163.519	13.6551	19.2199	36.0188	1.16115	0.696693	733.934	6.76274	8.02318	3.34777	15.4913	86.3029	9.25	54.2824
8MWOW_S_2	Male	Khuvsgul	Urban	Summer	2	28	Saturday	July	0.90492	339.899	33.754	53.4479	43.7131	4.13111	1.70711	101.614	26.38	20.0962	9.92515	25.6545	252.288	19.227	56.3308
8MWOW_S_3	Male	Khuvsgul	Urban	Summer	3	28	Sunday	July	0.723936	190.675	20.7627	29.2965	214.779	3.09509	1.47291	877.927	13.0957	101.287	6.61654	32.3682	269.051	6.15	30.4699
8MWOW_W_1	Male	Khuvsgul	Urban	Winter	1	28	Sunday	February	0.732485	146.965	5.28283	23.4857	84.7184	0.779716	0.450249	138.998	4.57527	59.0836	1.48522	4.16548	2.86555	0	0
8MWOW_W_2	Male	Khuvsgul	Urban	Winter	2	28	Monday	February	0.732485	71.8908	12.4575	16.5489	85.1592	1.23455	0.321541	118.508	7.31971	21.0085	2.38499	18.0806	254.849	54.6	196.518
8MWOW_W_3	Male	Khuvsgul	Urban	Winter	3	28	Tuesday	February	0.915606	19.4485	3.64121	7.80708	51.1829	0.518624	0.178341	51.1901	3.5848	14.1533	1.05511	7.99005	0.0209232	5.675	90.0013
9MWOW_S_1	Male	Khuvsgul	Urban	Summer	1	32	Friday	July	0.90492	153.33	17.4521	46.3642	192.08	2.76312	1.24868	278.306	5.59321	6.15792	3.43162	21.8618	168.754	27.876	0
9MWOW_S_2	Male	Khuvsgul	Urban	Summer	2	32	Saturday	July	0.90492	176.144	25.8239	31.1821	81.4967	2.10795	0.590083	165.436	20.2184	16.3049	3.02801	19.3521	236.957	26.25	28.0374
9MWOW_S_3	Male	Khuvsgul	Urban	Summer	3	32	Sunday	July	0.723936	29.4589	7.09256	8.08524	54.7707	0.863803	0.345848	114.322	3.19209	7.6976	1.68263	10.1662	195.505	3.168	126.919
9MWOW_W_1	Male	Khuvsgul	Urban	Winter	1	32	Sunday	February	0.732485	73.4191	8.19192	13.6519	27.52	0.915719	0.536707	138.568	3.89893	7.0559	1.52828	12.4383	108.235	10.8	57.8671
9MWOW_W_2	Male	Khuvsgul	Urban	Winter	2	32	Monday	February	0.732485	41.1068	9.07174	9.28333	73.006	1.03214	0.336313	111.666	4.5867	10.0628	4.96543	8.48249	142.88	8.624	172.577
9MWOW_W_3	Male	Khuvsgul	Urban	Winter	3	32	Tuesday	February	0.915606	61.2575	3.33004	6.57586	46.4682	1.93395	1.02317	56.515	1.25286	6.27881	1.1731	1.93563	37.1268	2.24	109.845
10FUMO_S_1	Female	Omnogobi	Urban	Summer	1	47	Saturday	August	1.04824	49.0075	6.01121	7.93416	252.165	1.12406	0.227095	256.016	4.59786	14.8919	1.34847	10.3416	128.863	35.1	127
10FUMO_S_2	Female	Omnogobi	Urban	Summer	2	47	Sunday	August	0.838589	47.1679	7.50168	13.3492	58.89	0.712878	0.325485	76.5876	4.26648	8.85395	1.69779	13.6292	118.451	0	0
10FUMO_S_3	Female	Omnogobi	Urban	Summer	3	47	Monday	August	0.838589	100.199	12.6779	25.5908	751.58	0.907509	0.691556	915.992	8.83461	366.781	11.7204	14.1364	246.024	14.84	0
10FUMO_W_1	Female	Omnogobi	Urban	Winter	1	47	Tuesday	March	1.06765	1310.92	70.352	54.4966	384.766	3.77681	2.59279	432.924	8.13806	14.8046	42.4304	23.4164	613.562	28.776	32.0062
10FUMO_W_2	Female	Omnogobi	Urban	Winter	2	47	Wedesday	March	1.06765	243.825	34.3631	46.4737	2.51765	2.80584	2.13423	34.4577	12.6995	17.0218	4.27644	34.9348	713.037	0	0
10FUMO_W_3	Female	Omnogobi	Urban	Winter	3	47	Thursday	March	1.06765	381.917	27.486	34.1595	237.776	1.99835	2.0045	379.502	9.45453	19.0008	12.5532	23.5579	512.15	47.704	0
11FUMO_S_1	Female	Omnogobi	Urban	Summer	1	32	Tuesday	August	1.82429	40.2109	5.74213	9.94253	1519.38	1.20884	0.229001	1523.07	17.4457	7.65693	1.19739	6.14202	0.246	0	0
11FUMO_S_2	Female	Omnogobi	Urban	Summer	2	32	Wedesday	August	1.82429	26.5215	6.26896	7.66654	93.62	0.548041	0.294783	165.516	1.31184	6.83308	5.65734	6.92398	171.965	10.36	0
11FUMO_S_3	Female	Omnogobi	Urban	Summer	3	32	Thursday	August	1.82429	184.825	16.4311	13.2732	9.5796	0.932937	1.00284	4260.44	2.74248	4.62685	8.6063	11.0244	115.658	31.5	0
11FUMO_W_1	Female	Omnogobi	Urban	Winter	1	32	Tuesday	March	1.76348	153.38	9.32435	10.6003	263.531	1.16222	0.680269	265.985	3.57406	20.7476	4.39359	8.18356	169.758	13.464	91.8934
11FUMO_W_2	Female	Omnogobi	Urban	Winter	2	32	Wedesday	March	1.76348	207.04	10.3172	13.6901	16.33	1.04402	1.26336	146.528	3.25345	64.8028	6.07206	8.79271	257.992	7.656	0
11FUMO_W_3	Female	Omnogobi	Urban	Winter	3	32	Thursday	March	1.76348	122.688	11.7048	17.6587	155.722	1.6315	0.864595	303.842	6.342	83.3688	2.66081	15.1541	147.185	31.68	66.5728
12FUMO_S_1	Female	Omnogobi	Urban	Summer	1	27	Wedesday	August	1.82429	133.511	12.1636	16.0752	276.468	1.55045	0.713446	369.336	3.80362	48.3522	11.0638	16.1931	197.389	63.822	74.1263
12FUMO_S_2	Female	Omnogobi	Urban	Summer	2	27	Thursday	August	1.82429	99.1429	13.4036	22.6973	2288.43	2.36322	1.03657	2359.79	23.45	51.3604	4.54175	15.8629	65.7386	5.664	122.52
12FUMO_S_3	Female	Omnogobi	Urban	Summer	3	27	Friday	August	1.82429	50.215	7.85848	8.13952	208.981	1.02824	0.302537	235.459	2.84354	12.9368	3.29305	9.17225	149.688	30.75	82.1722
12FUMO_W_1	Female	Omnogobi	Urban	Winter	1	26	Wedesday	February	1.76348	85.4268	16.092	16.8134	155.017	1.46767	0.684202	217.659	7.70009	62.0971	3.78189	11.6271	194.92	8.088	104.34
12FUMO_W_2	Female	Omnogobi	Urban	Winter	2	26	Thursday	February	1.76348	53.5307	12.3529	15.0816	58.5364	0.952218	0.378604	218.882	6.64779	18.3653	2.49165	14.2096	164.16	0	74.7664
12FUMO_W_3	Female	Omnogobi	Urban	Winter	3	26	Friday	February	1.76348	27.1682	8.43581	6.98991	160.455	0.756507	0.424654	176.033	4.20792	19.5614	2.18058	5.31261	107.006	0	120.372
1FUMO_S_1	Female	Omnogobi	Urban	Summer	1	55	Sunday	August	0.838589	118.768	8.04515	14.2453	253.714	1.51221	0.758193	606.443	5.75603	25.1841	2.3443	12.5464	45.7939	12.072	244.527
1FUMO_S_2	Female	Omnogobi	Urban	Summer	2	55	Monday	August	0.838589	77.7842	12.6835	15.2985	855.539	2.67387	0.976417	915.456	8.54603	65.943	7.0856	14.8765	232.774	10.612	460.285
1FUMO_S_3	Female	Omnogobi	Urban	Summer	3	55	Tuesday	August	1.04824	62.706	7.69662	13.3924	366.628	2.00467	0.672786	484.866	5.98037	41.6797	1.89226	14.1091	36.82	17.16	460.633
2FUMO_S_1	Female	Omnogobi	Urban	Summer	1	27	Tuesday	August	1.82429	37.6478	4.39147	6.03358	39.4276	0.589406	0.391707	74.7808	1.50646	7.0598	0.939951	3.98194	84.0723	0	93.2019
2FUMO_S_2	Female	Omnogobi	Urban	Summer	2	27	Wedesday	August	1.82429	69.0552	6.50282	7.12065	314.775	0.777564	0.548322	331.115	1.34656	7.44599	0.971585	3.66162	101.045	0	0
2FUMO_S_3	Female	Omnogobi	Urban	Summer	3	27	Thursday	August	1.82429	22.6676	5.04877	6.31033	22.2051	0.530851	0.294345	49.0456	2.00059	3.25805	1.03133	6.00186	88.1235	21.39	52.4901
2FUMO_W_1	Female	Omnogobi	Urban	Winter	1	27	Tuesday	March	1.76348	55.0611	8.04044	11.7589	0	0.673854	0.335879	74.1532	3.24952	3.12507	4.33667	11.784	184.899	13.84	0
2FUMO_W_2	Female	Omnogobi	Urban	Winter	2	27	Wedesday	March	1.76348	54.2601	7.90297	12.0301	0	0.546153	0.285013	32.5123	4.33676	6.87302	3.21159	11.1859	166.441	5.32	0
2FUMO_W_3	Female	Omnogobi	Urban	Winter	3	27	Thursday	March	1.76348	105.337	8.89524	11.3292	128.525	0.908375	0.399219	139.944	4.22181	57.8392	1.6631	10.4801	139.189	29.575	0
3FUMO_S_1	Female	Omnogobi	Urban	Summer	1	47	Wedesday	August	1.04824	56.0666	2.42417	6.81591	266.203	0.629442	0.415552	300.744	0.79732	29.6151	2.4254	3.45758	0.21	0	0
3FUMO_S_2	Female	Omnogobi	Urban	Summer	2	47	Thursday	August	1.04824	131.017	15.4745	19.451	767.077	1.54985	1.01002	880.116	6.05779	22.2272	4.20969	14.5723	233.352	25.95	38.7915
3FUMO_S_3	Female	Omnogobi	Urban	Summer	3	47	Friday	August	1.04824	59.743	7.96405	9.50445	85.84	0.907149	0.470271	131.591	1.91438	51.4313	5.78644	7.25362	200.375	10.08	0
3FUMO_W_1	Female	Omnogobi	Urban	Winter	1	47	Saturday	March	1.06765	151.693	10.4838	15.4226	93.985	1.5996	0.918891	93.9891	3.0281	2.92995	5.27854	13.5246	97.1321	13.112	51.978
3FUMO_W_2	Female	Omnogobi	Urban	Winter	2	47	Sunday	March	0.854118	114.315	5.5916	8.97883	236.511	2.26678	0.75454	274.651	2.70524	109.12	2.89224	10.2803	0	0	0
3FUMO_W_3	Female	Omnogobi	Urban	Winter	3	47	Monday	March	0.854118	213.591	11.037	13.4426	82.1433	1.75349	1.14513	136.86	3.56572	14.0936	4.59162	11.3392	203.109	13.904	32.0062
4FUMO_S_1	Female	Omnogobi	Urban	Summer	1	27	Friday	August	1.82429	120.05	21.6418	35.6573	0	2.17916	2.094	247.965	9.03729	19.9225	7.92455	26.6353	330.652	42.12	0
4FUMO_S_2	Female	Omnogobi	Urban	Summer	2	27	Saturday	August	1.82429	102.324	15.6039	14.4484	240	1.82863	1.22682	280.403	3.46298	22.6064	5.43114	10.7173	238.034	9.016	0
4FUMO_S_3	Female	Omnogobi	Urban	Summer	3	27	Sunday	August	1.45943	297.899	18.9551	25.8071	23.7062	1.76829	0.861534	24.25	5.27919	5.21478	26.8146	25.8077	318.749	0	55.3086
4FUMO_W_1	Female	Omnogobi	Urban	Winter	1	27	Saturday	March	1.76348	82.0773	9.96664	15.7096	281.22	1.215	1.03157	345.15	4.44201	29.5558	1.72365	11.1966	119.622	8.88	88.7449
4FUMO_W_2	Female	Omnogobi	Urban	Winter	2	27	Sunday	March	1.41079	173.6	28.7427	48.2486	0	1.86316	0.675606	81.9853	19.6438	31.9318	4.31104	48.9297	581.27	12.48	0
4FUMO_W_3	Female	Omnogobi	Urban	Winter	3	27	Monday	March	1.41079	567.967	23.9219	38.8489	328.624	2.49755	2.13533	425.393	11.1758	12.8941	12.926	27.4203	681.723	18.76	75.5884
5FUMO_S_1	Female	Omnogobi	Urban	Summer	1	22	Friday	August	1.82429	259.283	9.44459	7.20112	237.62	6.98655	0.906997	354.409	2.57536	14.9846	3.48993	9.0905	341	11.76	0
5FUMO_S_2	Female	Omnogobi	Urban	Summer	2	22	Saturday	August	1.82429	116.091	8.24179	7.66156	213.539	0.791546	0.362836	302.4	2.53751	52.2672	6.996	8.13419	129.212	6.44	23.0444
5FUMO_S_3	Female	Omnogobi	Urban	Summer	3	22	Sunday	August	1.45943	193.38	8.71392	10.2319	0.28	0.671398	0.411268	40.3066	1.15902	0.346748	20.3332	9.08346	154.941	8.932	0
5FUMO_W_1	Female	Omnogobi	Urban	Winter	1	22	Saturday	March	1.76348	179.035	30.2652	29.8928	0	2.42558	2.62387	108.265	3.71554	4.48159	9.9812	14.6642	329.34	14.4	0
5FUMO_W_2	Female	Omnogobi	Urban	Winter	2	22	Sunday	March	1.41079	268.692	44.773	54.1598	0	2.9256	2.52716	261.026	14.4965	21.4079	24.7488	40.6966	878.246	51.28	0
5FUMO_W_3	Female	Omnogobi	Urban	Winter	3	22	Monday	March	1.41079	208.506	34.6202	50.1055	440.8	3.04734	1.00614	600.652	20.4451	61.807	17.9959	52.3063	866.831	30.8	0
6FUMO_S_1	Female	Omnogobi	Urban	Summer	1	27	Saturday	August	1.82429	75.4201	5.85267	12.0666	27.6588	0.614468	0.372932	109.712	3.45675	6.20382	1.38354	10.8552	103.681	8.4	12.8025
6FUMO_S_2	Female	Omnogobi	Urban	Summer	2	27	Sunday	August	1.45943	37.2162	6.45783	9.4033	42.7933	0.733483	0.364216	89.6779	3.24792	4.28483	1.50236	10.1594	66.1847	0	25.6049
6FUMO_S_3	Female	Omnogobi	Urban	Summer	3	27	Monday	August	1.45943	177.829	13.4212	27.6531	223.048	1.82673	0.735956	481.35	12.0419	146.621	3.15123	28.0461	28.2346	36	0
6FUMO_W_1	Female	Omnogobi	Urban	Winter	1	27	Tuesday	March	1.76348	85.302	6.71639	10.8739	454.783	1.81261	0.670886	552.809	4.68041	34.7169	3.01476	12.0279	47.3745	0	280.078
6FUMO_W_2	Female	Omnogobi	Urban	Winter	2	27	Wedesday	March	1.76348	190.462	23.2399	46.7492	560.29	2.89514	0.963298	599.541	21.8714	65.0024	4.71886	47.3075	210.235	0	375
6FUMO_W_3	Female	Omnogobi	Urban	Winter	3	27	Thursday	March	1.76348	113.936	12.8539	22.6703	792.083	2.95631	0.778332	848.393	14.7696	59.7556	3.50004	26.7889	128.987	18	530.652
7FUMO_S_1	Female	Omnogobi	Urban	Summer	1	27	Wedesday	October	1.82429	233.202	8.71869	17.0348	60.0133	1.1001	0.96872	538.132	2.23371	5.62274	6.46212	11.063	44.9419	0	13.8272
7FUMO_S_2	Female	Omnogobi	Urban	Summer	2	27	Thursday	October	1.82429	235.572	15.7328	30.9422	623.9	1.68281	1.18532	1155.8	9.35129	78.0252	14.0825	28.1757	426.812	9.8	0
7FUMO_S_3	Female	Omnogobi	Urban	Summer	3	27	Friday	October	1.82429	225.624	20.0252	30.6209	162.742	2.02951	1.11866	554.133	7.58747	15.3505	6.00058	29.9124	316.125	7.2	0
7FUMO_W_1	Female	Omnogobi	Urban	Winter	1	27	Wedesday	March	1.76348	19.6078	1.96807	4.46268	23.2423	0.372238	0.137823	40.8507	1.87383	4.73263	0.585413	4.35427	0.0898082	0	55.0514
7FUMO_W_2	Female	Omnogobi	Urban	Winter	2	27	Thursday	March	1.76348	102.848	14.2113	17.0841	371.41	1.51587	1.5363	413.174	3.39959	69.3537	2.59196	6.44797	232.616	0	19.2037
7FUMO_W_3	Female	Omnogobi	Urban	Winter	3	27	Friday	March	1.76348	28.9343	8.07434	11.1221	8.12382	0.743059	0.374834	43.3798	2.47758	2.11591	3.78381	11.3177	207.759	5.6	19.2037
8FUMO_S_1	Female	Omnogobi	Urban	Summer	1	22	Friday	August	1.82429	584.659	21.6304	47.1045	15555.1	8.3045	0.869509	16151.6	170.27	140.123	7.07316	22.6406	172.551	8.4	55.9474
8FUMO_S_2	Female	Omnogobi	Urban	Summer	2	22	Saturday	August	1.82429	45.6279	7.66821	10.348	44.7933	0.846258	0.533955	82.2804	2.90759	12.8556	1.81773	7.79648	171.422	0	91.5729
8FUMO_S_3	Female	Omnogobi	Urban	Summer	3	22	Sunday	August	1.45943	65.7177	8.87993	12.3616	220.288	1.01394	0.509124	229.735	4.46822	39.615	2.21145	11.2522	175.685	0	92.7635
8FUMO_W_1	Female	Omnogobi	Urban	Winter	1	22	Tuesday	March	1.76348	66.9721	12.305	20.8104	40.0406	1.54743	0.926174	334.418	7.20535	14.1298	3.02421	19.4539	140.47	0	46.0503
8FUMO_W_2	Female	Omnogobi	Urban	Winter	2	22	Wedesday	March	1.76348	53.0091	6.67638	8.52905	142.488	1.21761	0.618637	695.072	1.2697	10.8815	2.42737	6.64341	58.2957	0	28.1896
8FUMO_W_3	Female	Omnogobi	Urban	Winter	3	22	Thursday	March	1.76348	32.0664	4.11946	4.64959	86.7333	0.685967	0.22799	115.281	1.62927	42.5016	3.30643	5.27864	92.7607	5.6	47.667
9FUMO_S_1	Female	Omnogobi	Urban	Summer	1	23	Thursday	August	1.82429	119.57	15.4892	10.7442	638.049	1.30372	0.892263	666.579	6.11762	26.7933	7.04258	11.1773	164.747	5.04	0
9FUMO_S_2	Female	Omnogobi	Urban	Summer	2	23	Friday	August	1.82429	149.906	12.5389	12.139	1480.07	1.71763	1.08719	1548.53	3.96886	142.235	6.41945	9.05776	132.993	0	0
9FUMO_S_3	Female	Omnogobi	Urban	Summer	3	23	Saturday	August	1.82429	287.62	34.2997	36.0785	924.177	3.41613	3.26581	1090.52	7.98694	142.957	11.1896	17.7438	608.356	11.256	0
9FUMO_W_1	Female	Omnogobi	Urban	Winter	1	23	Tuesday	March	1.76348	339.216	20.2604	26.6202	180.497	2.35951	1.6322	390.432	8.13941	49.6134	7.63287	17.4412	339.316	37.208	228.245
9FUMO_W_2	Female	Omnogobi	Urban	Winter	2	23	Wedesday	March	1.76348	586.45	34.3642	32.7738	802.88	2.84465	3.13122	817.24	11.0364	491.46	14.9038	15.3068	656.405	57.095	143.516
9FUMO_W_3	Female	Omnogobi	Urban	Winter	3	23	Thursday	March	1.76348	430.149	19.0464	16.6714	149.172	1.62143	1.69288	151.134	3.13421	38.4435	10.6846	5.89994	378.655	46.664	206.526
10MUMO_S_1	Male	Omnogobi	Urban	Summer	1	27	Friday	August	0.90492	103.937	14.4058	23.6727	1853.77	2.59901	1.11025	1872.7	24.1902	23.2274	3.46129	18.6691	115.03	2.64	172.275
10MUMO_S_2	Male	Omnogobi	Urban	Summer	2	27	Saturday	August	0.90492	140.007	10.9898	12.3724	154.076	1.91733	1.14196	206.963	2.68163	20.862	4.85036	9.74562	200.718	12.348	232.877
10MUMO_S_3	Male	Omnogobi	Urban	Summer	3	27	Sunday	August	0.723936	122.634	5.35632	5.69212	43.259	0.620614	0.437595	63.681	1.1043	4.84141	2.78985	4.47941	101.16	10.9216	79.7597
10MUMO_W_1	Male	Omnogobi	Urban	Winter	1	27	Tuesday	December	0.915606	192.697	25.4952	28.7277	15.8986	1.77972	1.38199	136.079	8.66036	1.30245	5.58126	15.6445	164.827	10.158	23.0444
10MUMO_W_2	Male	Omnogobi	Urban	Winter	2	27	Wedesday	December	0.915606	145.329	16.6822	16.4661	143.04	1.10451	0.732121	302.606	5.93417	11.3461	9.97947	11.3399	344.336	20.024	37.0048
10MUMO_W_3	Male	Omnogobi	Urban	Winter	3	27	Thursday	December	0.915606	165.004	26.6585	46.2507	36.5327	3.09951	1.60674	86.3627	12.4845	5.0075	12.4075	44.3997	252.952	15.52	82.7767
1MUMO_S_1	Male	Omnogobi	Urban	Summer	1	32	Thursday	August	0.90492	123.281	13.0554	18.3047	42.28	1.16442	0.713894	166.611	4.67988	4.40363	3.58625	18.8017	350.052	0	0
1MUMO_S_2	Male	Omnogobi	Urban	Summer	2	32	Friday	August	0.90492	39.2515	10.9283	20.5804	0	1.226	0.676097	69.557	5.5286	0.533679	4.20553	21.7576	79.9984	4.788	0
1MUMO_S_3	Male	Omnogobi	Urban	Summer	3	32	Saturday	August	0.90492	121.836	8.5828	15.6169	14.8937	0.996379	0.708399	262.744	4.26518	2.51769	2.32543	15.5595	122.942	19.296	35.2068
1MUMO_W_1	Male	Omnogobi	Urban	Winter	1	33	Tuesday	March	0.915606	55.3915	3.51337	7.03474	6.5	0.45301	0.287264	50.0035	1.45343	2.46578	1.4464	6.727	44.4	4.2	0
1MUMO_W_2	Male	Omnogobi	Urban	Winter	2	33	Wedesday	March	0.915606	70.9728	11.1278	19.6768	0	0.940385	0.434465	413.27	6.67747	7.67925	5.24721	19.7249	162.318	22.4	0
1MUMO_W_3	Male	Omnogobi	Urban	Winter	3	33	Thursday	March	0.915606	40.1881	14.6189	25.7215	15	1.74322	1.40973	88.3688	8.13197	108.272	6.76371	24.8211	265.942	7	0
2MUMO_S_1	Male	Omnogobi	Urban	Summer	1	27	Saturday	August	0.90492	168.496	14.9044	27.2642	63.4121	1.61292	1.2859	330.788	6.1771	14.3823	3.5383	18.6459	83.5198	25.428	61.3238
2MUMO_S_2	Male	Omnogobi	Urban	Summer	2	27	Sunday	August	0.723936	49.1569	6.75986	9.7631	213.088	0.990619	0.420294	260.703	3.46017	12.8965	2.23025	10.6671	209.705	0	81.5549
2MUMO_S_3	Male	Omnogobi	Urban	Summer	3	27	Monday	August	0.723936	202.453	22.1209	44.7946	508.565	2.71791	2.01956	521.78	18.1255	82.465	3.3694	40.6014	150.981	0	279.631
2MUMO_W_1	Male	Omnogobi	Urban	Winter	1	27	Tuesday	December	0.915606	99.8308	11.6616	22.733	139.001	1.59723	0.889813	182.075	5.87409	10.0261	4.14895	22.6786	82.492	3.344	60.1716
2MUMO_W_2	Male	Omnogobi	Urban	Winter	2	27	Wedesday	December	0.915606	76.1889	10.4138	11.1413	203.24	0.791839	0.347751	298.886	4.31273	19.6755	7.52037	11.0489	227.645	11.76	83.216
2MUMO_W_3	Male	Omnogobi	Urban	Winter	3	27	Thursday	December	0.915606	68.6826	10.683	15.1841	241.469	1.11168	0.312962	248.324	7.13061	24.6143	3.93412	16.5481	181.46	0	105.402
3MUMO_S_1	Male	Omnogobi	Urban	Summer	1	27	Friday	August	0.90492	124.254	12.0386	13.0066	238.246	1.37252	0.822043	355.759	4.63578	97.1238	2.97211	12.7342	110.929	20.18	0
3MUMO_S_2	Male	Omnogobi	Urban	Summer	2	27	Saturday	August	0.90492	208.024	19.3794	24.4083	353.669	1.51688	1.47584	354.007	8.21266	24.8016	4.34084	17.4299	397.225	8.008	0
3MUMO_S_3	Male	Omnogobi	Urban	Summer	3	27	Sunday	August	0.723936	223.837	32.0691	55.734	1464.72	3.31933	1.67397	1524.95	36.8798	42.2127	9.13242	47.6491	362.658	13.44	45.0647
3MUMO_W_1	Male	Omnogobi	Urban	Winter	1	27	Tuesday	December	0.915606	160.653	25.4304	36.6069	476.536	2.96097	1.31194	668.581	10.4341	33.5443	14.3595	33.4317	470.185	21.84	37.5
3MUMO_W_2	Male	Omnogobi	Urban	Winter	2	27	Wedesday	December	0.915606	251.357	31.9913	86.0112	773.995	5.21536	2.01856	1059.23	35.0115	55.4128	8.30139	60.9475	227.031	15.576	0
3MUMO_W_3	Male	Omnogobi	Urban	Winter	3	27	Thursday	December	0.915606	127.455	16.5539	28.9013	799.808	2.0013	1.1797	923.505	10.6587	80.1452	6.67578	30.2427	227.528	11.28	149.091
4MUMO_S_1	Male	Omnogobi	Urban	Summer	1	47	Friday	August	1.24649	75.2268	23.2174	23.3766	131.402	1.47061	0.746846	230.714	11.3278	7.28413	7.2687	18.1975	363.546	9.8	46.729
4MUMO_S_2	Male	Omnogobi	Urban	Summer	2	47	Saturday	August	1.24649	92.5946	28.1059	27.4716	262.614	1.93632	0.752755	270.464	16.6034	80.2982	8.55525	19.8695	131.616	50.538	0
4MUMO_S_3	Male	Omnogobi	Urban	Summer	3	47	Sunday	August	0.997193	35.0662	9.4688	10.1492	116.196	0.783862	0.41717	152.509	4.39038	7.30537	1.47417	9.61437	215.086	7.032	58.9796
4MUMO_W_1	Male	Omnogobi	Urban	Winter	1	47	Tuesday	December	1.33882	112.993	49.4422	47.4231	30.2681	2.38654	1.17996	98.0279	22.1451	11.632	11.6464	30.8144	280.443	20.67	38.4074
4MUMO_W_2	Male	Omnogobi	Urban	Winter	2	47	Wedesday	December	1.33882	103.128	41.3543	39.4892	321.383	2.16369	1.06402	391.957	19.7331	30.8811	10.1715	28.0527	424.937	11.76	66.368
4MUMO_W_3	Male	Omnogobi	Urban	Winter	3	47	Thursday	December	1.33882	109.45	23.5748	31.4474	456.948	2.61989	1.54409	532.156	12.3722	23.5419	3.51511	23.9807	307.639	0	32.2622
5MUMO_S_1	Male	Omnogobi	Urban	Summer	1	27	Friday	August	0.90492	188.576	21.597	27.2571	287.637	1.72125	1.56043	376.739	5.95709	38.3414	6.4156	17.7751	356.223	56.4	27.5253
5MUMO_S_2	Male	Omnogobi	Urban	Summer	2	27	Saturday	August	0.90492	341.422	19.9532	38.6919	568.672	4.95887	2.07339	577.07	9.63338	201.451	5.89809	20.2236	388.606	10.75	64.0709
5MUMO_S_3	Male	Omnogobi	Urban	Summer	3	27	Sunday	August	0.723936	230.172	12.6231	9.62708	284.863	1.22126	0.565353	1770.41	1.26774	99.2146	9.74245	6.82554	270.481	23.4	0
5MUMO_W_1	Male	Omnogobi	Urban	Winter	1	27	Tuesday	December	0.915606	150.386	19.1916	22.8348	372.49	3.34862	1.02831	423.122	5.9016	113.632	9.01676	24.9574	439.128	10.724	42.8651
5MUMO_W_2	Male	Omnogobi	Urban	Winter	2	27	Wedesday	December	0.915606	116.441	10.74	22.3632	173.288	1.54558	0.5372	694.464	9.05913	27.0222	2.95515	21.5526	22.5837	0	105.877
5MUMO_W_3	Male	Omnogobi	Urban	Winter	3	27	Thursday	December	0.915606	77.6741	20.1718	15.6204	235.442	2.67454	1.46871	345.468	8.22996	22.7231	11.5951	10.5614	364.531	21.98	218.019
6MUMO_S_1	Male	Omnogobi	Urban	Summer	1	43	Friday	August	2.69781	71.5426	17.0747	19.3539	181.921	1.48498	0.73056	263.804	4.15041	14.8193	9.25423	20.1023	451.897	73.944	40.9679
6MUMO_S_2	Male	Omnogobi	Urban	Summer	2	43	Saturday	August	2.69781	55.528	4.99894	9.49363	21.539	0.759754	0.418465	33.6685	2.74493	5.48836	0.704485	8.22235	33.5511	0	51.1588
6MUMO_S_3	Male	Omnogobi	Urban	Summer	3	43	Sunday	August	2.15825	86.9938	11.901	15.5177	127.914	1.06805	0.584498	186.096	4.90552	16.6114	7.4008	14.4241	252.194	12.6	51.1588
6MUMO_W_1	Male	Omnogobi	Urban	Winter	1	42	Tuesday	December	3.07327	109.667	10.0906	10.9973	329.625	1.66748	0.643424	349.892	3.79653	143.461	3.38408	11.0647	184.64	0	54.9226
6MUMO_W_2	Male	Omnogobi	Urban	Winter	2	42	Wedesday	December	3.07327	132.845	30.9548	35.1825	412.844	2.13961	1.5497	543.625	14.3521	43.915	5.08899	20.7485	59.2411	0	0
6MUMO_W_3	Male	Omnogobi	Urban	Winter	3	42	Thursday	December	3.07327	136.928	13.5696	18.4684	94.2172	1.09588	0.839674	244.415	4.92082	18.4028	7.90884	15.3884	274.854	21.196	0
7MUMO_S_1	Male	Omnogobi	Urban	Summer	1	32	Friday	August	0.90492	64.289	8.25281	10.9125	209.1	0.796892	0.402056	364.623	1.49196	10.1002	18.8679	8.35381	277.695	10.64	32.0062
7MUMO_S_2	Male	Omnogobi	Urban	Summer	2	32	Saturday	August	0.90492	140.037	23.3318	33.4767	3369.58	3.56909	1.30522	3442.19	44.0993	31.923	7.39927	22.2029	238.861	9.8	37.1271
7MUMO_S_3	Male	Omnogobi	Urban	Summer	3	32	Sunday	August	0.723936	23.1627	4.99976	10.6015	0	0.622224	0.386037	102.195	2.41993	0.249646	0.903432	10.5086	1.06	9.096	0
7MUMO_W_1	Male	Omnogobi	Urban	Winter	1	32	Tuesday	December	0.915606	102.01	16.3674	24.1384	70.2574	1.76596	0.948056	174.074	5.26334	8.00701	4.70242	23.6641	357.842	0	55.9468
7MUMO_W_2	Male	Omnogobi	Urban	Winter	2	32	Wedesday	December	0.915606	144.112	19.8936	37.8195	185.662	1.80958	1.45904	348.259	13.4852	24.6946	6.14054	37.3279	231.209	21.66	66.4448
7MUMO_W_3	Male	Omnogobi	Urban	Winter	3	32	Thursday	December	0.915606	106.908	22.0701	33.9488	164.474	3.88691	2.52488	249.246	8.15162	11.0963	4.01187	38.0617	428.469	9.792	151.254
8MUMO_S_1	Male	Omnogobi	Urban	Summer	1	22	Friday	August	0.90492	188.535	15.2666	22.6449	1446.01	2.35768	0.750448	1552.82	15.2306	274.431	7.99992	28.2442	1.47	24.168	0
8MUMO_S_2	Male	Omnogobi	Urban	Summer	2	22	Saturday	August	0.90492	174.604	24.6493	33.9933	133.872	3.1951	1.22435	169.017	7.60754	4.04815	6.14921	37.3767	592.278	0	0
8MUMO_S_3	Male	Omnogobi	Urban	Summer	3	22	Sunday	August	0.723936	137.324	39.3698	39.3351	189.296	2.65338	1.70211	317.996	23.1776	58.7744	4.67836	21.1672	192.255	0	32.0062
8MUMO_W_1	Male	Omnogobi	Urban	Winter	1	22	Tuesday	December	0.915606	58.5242	13.9762	10.9804	434.963	0.707353	0.503968	537.666	5.70558	30.4112	7.2275	7.48352	214.84	7.84	0
8MUMO_W_2	Male	Omnogobi	Urban	Winter	2	22	Wedesday	December	0.915606	102.965	37.4473	36.2431	467.672	1.94381	1.46332	534.712	17.1664	28.6774	8.51219	19.1218	282.886	29.05	0
8MUMO_W_3	Male	Omnogobi	Urban	Winter	3	22	Thursday	December	0.915606	85.1699	15.5856	14.9615	108.72	0.799371	0.357817	156.611	7.5139	12.6913	6.03312	12.2862	297.424	9.184	0
9MUMO_S_1	Male	Omnogobi	Urban	Summer	1	27	Friday	August	0.90492	125.576	30.1844	29.4569	92.11	1.88761	1.10573	215.937	9.78166	12.906	11.2797	26.8442	638.722	121.248	0
9MUMO_S_2	Male	Omnogobi	Urban	Summer	2	27	Saturday	August	0.90492	206.964	19.3501	16.9232	85.2659	1.20409	0.886838	162.574	5.5278	7.3751	8.30462	12.691	368.015	66.104	38.6634
9MUMO_S_3	Male	Omnogobi	Urban	Summer	3	27	Sunday	August	0.723936	153.778	13.0574	18.6432	131.59	1.51983	1.28409	148.553	3.87789	11.9139	5.03336	14.5342	158.32	10.12	67.341
9MUMO_W_1	Male	Omnogobi	Urban	Winter	1	27	Tuesday	December	0.915606	187.957	16.2836	16.8861	37.4243	1.77971	0.740613	54.5939	3.1893	1.43598	5.08211	16.1509	312.502	12.848	0
9MUMO_W_2	Male	Omnogobi	Urban	Winter	2	27	Wedesday	December	0.915606	111.294	14.829	15.214	197.869	0.993682	0.733326	315.048	5.82197	11.178	6.88893	11.1223	257.858	21.532	0
9MUMO_W_3	Male	Omnogobi	Urban	Winter	3	27	Thursday	December	0.915606	137.202	22.1712	30.8398	278.182	2.84281	1.08446	552.944	9.09436	28.1	5.85373	30.0259	253.771	22.308	102.42
10FEOW_S_1	Female	Sukhbaatar	Urban	Summer	1	51	Monday	August	0.838589	293.333	30.6169	35.3059	15092.6	9.43637	1.3173	15131	157.139	14.4003	9.34128	22.3214	274.925	30.888	246.009
10FEOW_S_2	Female	Sukhbaatar	Urban	Summer	2	51	Tuesday	August	1.04824	100.221	19.3481	18.3349	75.0564	1.74403	1.38447	88.4876	5.26973	10.7477	2.5012	7.99105	310.852	2.35	172.333
10FEOW_S_3	Female	Sukhbaatar	Urban	Summer	3	51	Wedesday	August	1.04824	40.6915	4.45191	8.09871	342.45	0.815625	0.341589	423.511	3.42987	31.4084	2.33013	8.8172	37.6026	7.104	145.948
10FEOW_W_1	Female	Sukhbaatar	Urban	Winter	1	51	Sunday	February	0.854118	167.719	33.9807	31.1459	452.814	2.34565	1.15053	465.894	15.8181	43.0862	8.15586	28.9501	330.061	12.408	236.563
10FEOW_W_2	Female	Sukhbaatar	Urban	Winter	2	51	Monday	February	0.854118	79.4874	11.5841	9.66621	55.7329	0.871435	0.444209	105.232	5.33451	7.54282	6.19099	8.87875	193.406	15.032	125.659
10FEOW_W_3	Female	Sukhbaatar	Urban	Winter	3	51	Tuesday	February	1.06765	73.5355	14.6504	10.4815	26.7656	0.723045	0.400422	47.6182	5.83526	3.84085	2.94685	8.13682	243.642	52.53	55.3217
1FEOW_S_1	Female	Sukhbaatar	Urban	Summer	1	37	Monday	August	0.974643	79.598	21.485	24.9145	128.054	1.58236	1.40836	217.339	13.0673	143.495	4.29286	27.6151	516.419	56.7	68.4932
1FEOW_S_2	Female	Sukhbaatar	Urban	Summer	2	37	Tuesday	August	1.2183	61.854	6.80985	6.96538	183.114	0.954433	0.361056	185.362	2.85654	62.5146	1.62189	6.62798	139.388	3	117.969
1FEOW_S_3	Female	Sukhbaatar	Urban	Summer	3	37	Wedesday	August	1.2183	85.1319	6.18124	16.0589	35.8742	0.812306	0.570558	174.057	4.3856	19.9747	1.58883	11.7593	20.6574	10.264	47.3155
1FEOW_W_1	Female	Sukhbaatar	Urban	Winter	1	37	Sunday	February	1.02814	220.364	22.0561	22.4233	356.377	2.86326	1.63276	1888.49	4.96959	91.4653	6.22875	10.2152	220.9	0	0
1FEOW_W_2	Female	Sukhbaatar	Urban	Winter	2	37	Monday	February	1.02814	83.4377	13.5066	13.7263	27.1335	0.992362	0.425444	3364.21	6.35496	8.50297	3.67974	17.3755	93.4984	0	64.1403
1FEOW_W_3	Female	Sukhbaatar	Urban	Winter	3	37	Tuesday	February	1.28518	115.334	26.1975	33.2597	238.843	3.12951	1.41856	356.312	13.9043	34.0302	7.4265	27.7992	298.595	9.24	466.044
2FEOW_S_1	Female	Sukhbaatar	Urban	Summer	1	36	Monday	August	0.974643	105.702	16.1543	24.3263	218.225	2.01706	0.911464	298.265	9.01454	32.1186	6.09367	22.7362	307.944	8.316	295.026
2FEOW_S_2	Female	Sukhbaatar	Urban	Summer	2	36	Tuesday	August	1.2183	102.786	13.8587	24.1436	183.073	1.45029	0.673457	229.903	9.57494	29.8287	4.05796	23.0687	216.71	4.536	133.786
2FEOW_S_3	Female	Sukhbaatar	Urban	Summer	3	36	Wedesday	August	1.2183	74.4009	12.3829	16.5734	309.201	1.12272	0.451878	412.644	6.7682	38.7187	8.74417	17.269	298.414	14.868	134.753
2FEOW_W_1	Female	Sukhbaatar	Urban	Winter	1	36	Sunday	February	1.02814	137.004	18.474	18.2167	84.8532	1.30802	0.603675	174.551	6.42443	7.30795	8.49793	16.1216	391.982	13.44	0
2FEOW_W_2	Female	Sukhbaatar	Urban	Winter	2	36	Monday	February	1.02814	169.383	11.2643	9.73341	3.33584	0.993641	0.753079	827.844	2.99079	0.888164	3.73893	10.2594	108.596	17.264	0
2FEOW_W_3	Female	Sukhbaatar	Urban	Winter	3	36	Tuesday	February	1.28518	58.1454	3.75143	4.91268	136.147	0.627487	0.250841	167.01	1.81934	13.6195	1.67617	5.18231	86.3774	1.848	96.0545
3FEOW_S_1	Female	Sukhbaatar	Urban	Summer	1	53	Monday	August	0.838589	80.7326	4.79153	6.5184	23.4171	0.488497	0.262219	73.9648	2.48941	5.32817	1.59598	6.4774	67.0822	9.376	48.7774
3FEOW_S_2	Female	Sukhbaatar	Urban	Summer	2	53	Tuesday	August	1.04824	99.5503	7.1997	11.2812	18.4429	0.702546	0.519053	94.8792	3.33698	6.60844	1.54641	8.98875	95.529	12.784	37.8953
3FEOW_S_3	Female	Sukhbaatar	Urban	Summer	3	53	Wedesday	August	1.04824	112.093	11.4291	14.6898	46.9925	0.97393	0.344905	58.0061	5.52164	13.7127	2.8034	13.99	249.592	59.818	105.876
3FEOW_W_1	Female	Sukhbaatar	Urban	Winter	1	53	Sunday	February	0.854118	61.6154	13.2747	22.7966	350.543	1.92618	0.665294	391.675	8.52531	36.7876	3.52766	22.5317	70.2034	0	324.357
3FEOW_W_2	Female	Sukhbaatar	Urban	Winter	2	53	Monday	February	0.854118	31.0686	7.00189	5.91845	281.696	0.901932	0.313564	325.865	3.28929	24.6562	2.82326	9.03394	162.295	29.55	172.388
3FEOW_W_3	Female	Sukhbaatar	Urban	Winter	3	53	Tuesday	February	1.06765	110.439	20.7553	33.7819	143.531	2.25875	1.80536	157.668	8.33444	31.6798	3.5649	20.7817	179.579	0	102.08
4FEOW_S_1	Female	Sukhbaatar	Urban	Summer	1	28	Monday	August	1.45943	143.385	22.0513	36.9297	870.257	2.15263	0.927557	956.084	16.3752	81.1458	6.83275	34.7787	174.633	36.45	156.062
4FEOW_S_2	Female	Sukhbaatar	Urban	Summer	2	28	Tuesday	August	1.82429	84.4289	21.8956	37.2009	181.57	2.57288	1.36079	286.247	11.1499	18.6095	12.0701	38.5386	245.387	18.556	96.0887
4FEOW_S_3	Female	Sukhbaatar	Urban	Summer	3	28	Wedesday	August	1.82429	30.1854	5.14429	4.85982	11.2109	0.328537	0.311014	44.694	1.14462	1.63282	6.19224	7.02334	0.0061609	5.064	26.5011
5FEOW_S_1	Female	Sukhbaatar	Urban	Summer	1	29	Monday	August	1.45943	90.6115	14.1807	20.9311	43.5403	0.991086	0.416514	170.745	9.27506	19.682	3.72506	20.4884	100.229	8.698	0
5FEOW_S_2	Female	Sukhbaatar	Urban	Summer	2	29	Tuesday	August	1.82429	355.53	51.3595	68.0954	122.667	2.99263	1.21929	519.611	25.8048	49.0594	40.4933	67.7022	1442.31	87.052	18.6916
5FEOW_S_3	Female	Sukhbaatar	Urban	Summer	3	29	Wedesday	August	1.82429	42.0938	3.3257	0.724294	402.821	0.857107	0.22771	406.142	2.07838	20.8214	1.91547	3.05841	0.00452394	0	19.4597
5FEOW_W_1	Female	Sukhbaatar	Urban	Winter	1	29	Sunday	February	1.41079	46.5876	16.7274	13.3595	6.60164	0.886877	0.316126	20.3075	7.10686	1.92457	3.40997	19.2377	358.049	89.85	15.68
5FEOW_W_2	Female	Sukhbaatar	Urban	Winter	2	29	Monday	February	1.41079	40.7815	7.04375	16.0971	108.286	1.19062	0.595102	138.897	3.83181	10.443	1.47334	5.33663	129.76	0	35.0071
5FEOW_W_3	Female	Sukhbaatar	Urban	Winter	3	29	Tuesday	February	1.76348	30.2197	8.57967	6.98465	493.272	0.801275	0.395698	520.041	4.14499	37.6765	3.54192	5.6474	111.859	0	110.616
6FEOW_S_1	Female	Sukhbaatar	Urban	Summer	1	27	Monday	August	1.45943	104.817	14.8598	21.7835	75.7002	1.47118	1.15117	180.79	6.75163	26.6637	3.97585	18.0683	123.694	14.177	71.1817
6FEOW_S_2	Female	Sukhbaatar	Urban	Summer	2	27	Tuesday	August	1.82429	81.8316	12.4868	16.7338	54.2277	1.23333	1.01412	99.5069	4.04099	12.6014	1.96828	11.0235	229.387	0	115.243
6FEOW_S_3	Female	Sukhbaatar	Urban	Summer	3	27	Wedesday	August	1.82429	31.3053	4.95578	8.82346	59.2193	0.699577	0.199833	97.9311	4.05307	12.6633	1.04378	9.45685	63.2596	0	134.426
6FEOW_W_1	Female	Sukhbaatar	Urban	Winter	1	27	Sunday	February	1.41079	51.4493	3.28767	8.59625	0	0.29955	0.243801	165.058	2.98281	4.24275	1.47528	7.50647	6.10029	0	0
6FEOW_W_2	Female	Sukhbaatar	Urban	Winter	2	27	Monday	February	1.41079	1.98922	0.4613	0.713596	5.47139	0.0789181	0.0294681	8.78249	0.208307	0.774177	0.136599	0.886905	24.2542	0	12.9955
6FEOW_W_3	Female	Sukhbaatar	Urban	Winter	3	27	Tuesday	February	1.76348	3.39459	0.857557	1.28027	30.292	0.273361	0.068901	35.8781	0.576282	4.11245	0.280293	1.77314	40.9016	0	71.7106
7FEOW_S_1	Female	Sukhbaatar	Urban	Summer	1	27	Monday	August	1.45943	57.81	6.4645	5.22481	25.849	0.492836	0.426564	31.0703	1.71936	213.202	1.46265	3.05475	101.277	2.4	20.4929
7FEOW_S_2	Female	Sukhbaatar	Urban	Summer	2	27	Tuesday	August	1.82429	65.211	3.74924	9.68105	44.8766	0.613158	0.17937	88.3088	2.36763	6.33484	0.818321	6.49224	9.40227	0	62.7321
7FEOW_W_1	Female	Sukhbaatar	Urban	Winter	1	27	Sunday	February	1.41079	58.1343	3.62195	26.0335	23.8884	2.28025	1.9421	42.0391	1.37714	4.21226	1.63985	4.39935	148.212	1.8	53.5143
7FEOW_W_2	Female	Sukhbaatar	Urban	Winter	2	27	Monday	February	1.41079	230.062	27.2428	29.744	502.457	1.42873	0.804803	525.486	8.92975	23.0508	3.79239	23.1985	548.972	100.5	29.4457
7FEOW_W_3	Female	Sukhbaatar	Urban	Winter	3	27	Tuesday	February	1.76348	137.052	18.3905	14.2863	442.816	1.21484	0.677414	446.555	5.48339	4.75818	2.57349	14.3137	342.367	0	61.4518
8FEOW_S_1	Female	Sukhbaatar	Urban	Summer	1	28	Monday	August	1.45943	287.516	32.7139	34.6128	402.416	5.0013	2.56872	435.372	16.5809	93.1316	14.9841	39.8252	172.51	14.96	215.361
8FEOW_S_2	Female	Sukhbaatar	Urban	Summer	2	28	Tuesday	August	1.82429	21.2821	2.84705	5.5202	75.6667	0.434727	0.170569	83.775	1.2017	7.3535	0.879476	3.22832	11.6639	0	55.2298
8FEOW_S_3	Female	Sukhbaatar	Urban	Summer	3	28	Wedesday	August	1.82429	96.219	2.35564	8.71682	150.561	0.60726	0.214848	166.205	0.427627	4.49757	0.487016	1.37143	16.0671	0	31.4904
8FEOW_W_1	Female	Sukhbaatar	Urban	Winter	1	28	Sunday	February	1.41079	58.1885	9.12125	11.4113	274.887	0.97351	0.806004	342.654	3.01417	26.914	1.67213	6.56169	187.167	10.656	100.226
8FEOW_W_2	Female	Sukhbaatar	Urban	Winter	2	28	Monday	February	1.41079	53.3877	4.5119	7.40834	18.9556	0.513963	0.302944	225.38	3.61295	2.54135	2.03193	8.99728	24.942	5.638	44.8086
8FEOW_W_3	Female	Sukhbaatar	Urban	Winter	3	28	Tuesday	February	1.76348	21.0456	10.1144	8.56653	26.3753	0.622311	0.293612	27.1104	4.83679	4.98584	1.34846	5.77744	141.875	4.65	62.348
9FEOW_S_1	Female	Sukhbaatar	Urban	Summer	1	52	Monday	August	0.838589	110.334	13.9658	18.2975	325.515	1.92552	0.934559	656.138	3.85093	24.7099	7.62478	16.84	205.697	19.68	153.488
9FEOW_S_2	Female	Sukhbaatar	Urban	Summer	2	52	Tuesday	August	1.04824	165.564	18.4574	17.7386	884.412	2.26028	1.5567	1004.88	3.02045	34.1399	4.58526	7.46847	240.279	0	225.451
9FEOW_S_3	Female	Sukhbaatar	Urban	Summer	3	52	Wedesday	August	1.04824	81.6393	10.4827	14.0981	395.923	2.28736	0.893291	452.936	4.47036	33.9077	4.48197	14.4336	104.192	0	331.58
9FEOW_W_1	Female	Sukhbaatar	Urban	Winter	1	52	Sunday	February	0.854118	107.852	15.8641	18.4448	235.748	1.79771	1.53994	291.305	4.37503	24.0285	3.09784	11.9976	221.323	0	159.007
9FEOW_W_2	Female	Sukhbaatar	Urban	Winter	2	52	Monday	February	0.854118	112.977	19.2024	18.0827	549.577	1.58166	0.975506	565.697	7.15969	7.32901	2.55648	10.7757	151.355	4.4	127
9FEOW_W_3	Female	Sukhbaatar	Urban	Winter	3	52	Tuesday	February	1.06765	94.4729	32.2783	33.7911	245.302	2.25761	1.43299	405.257	12.8262	7.65254	5.72349	20.9116	251.288	7.7	129.346
10MEOW_S_1	Male	Sukhbaatar	Urban	Summer	1	32	Monday	August	0.723936	113.073	11.6889	20.7774	138.505	1.33753	0.487351	232.101	9.60981	301.122	4.13428	19.7878	111.636	29.706	179.14
10MEOW_S_2	Male	Sukhbaatar	Urban	Summer	2	32	Tuesday	August	0.90492	31.2256	4.07976	6.00495	286.914	0.589289	0.252937	332.967	2.46566	25.2524	2.18478	6.50117	63.7559	0	95.9098
10MEOW_S_3	Male	Sukhbaatar	Urban	Summer	3	32	Wedesday	August	0.90492	87.9037	7.61384	11.2834	54.2534	1.09301	0.899941	274.219	1.64089	6.02563	1.83635	6.88046	84.4781	7.656	105.021
10MEOW_W_1	Male	Sukhbaatar	Urban	Winter	1	32	Sunday	February	0.732485	42.933	9.37519	11.4494	174.903	1.13667	0.271808	179.115	6.15634	27.1063	2.07222	14.4509	203.179	22.2	217.607
10MEOW_W_2	Male	Sukhbaatar	Urban	Winter	2	32	Monday	February	0.732485	100.918	18.3059	28.8617	132.298	1.5699	0.418015	134.263	12.5285	34.429	3.15036	30.4072	406.456	0	161.464
10MEOW_W_3	Male	Sukhbaatar	Urban	Winter	3	32	Tuesday	February	0.915606	57.6818	10.14	15.5454	58.0946	0.951168	0.281844	90.3631	6.74344	16.6577	1.86104	16.4527	204.604	0	117.969
1MEOW_S_1	Male	Sukhbaatar	Urban	Summer	1	49	Monday	August	0.997193	142.133	22.5939	27.7748	1312.41	2.99067	2.49313	1355.18	8.24154	96.7097	6.12496	15.9176	465.552	0	419.642
1MEOW_S_2	Male	Sukhbaatar	Urban	Summer	2	49	Tuesday	August	1.24649	44.963	12.1661	9.95362	270.149	1.34445	0.394169	355.922	7.25108	21.1539	10.1254	15.7859	315.825	19.068	258.846
1MEOW_S_3	Male	Sukhbaatar	Urban	Summer	3	49	Wedesday	August	1.24649	99.8157	20.2402	26.2205	1521.35	2.40085	1.00205	1616.24	26.5829	19.6062	11.7014	22.3708	396.104	21.168	65.0407
1MEOW_W_1	Male	Sukhbaatar	Urban	Winter	1	48	Sunday	February	1.07106	60.84	8.61381	15.0595	43.0207	0.799114	0.680912	43.0284	0.439781	5.48463	0.436029	6.67405	64.4026	0	97.2987
1MEOW_W_2	Male	Sukhbaatar	Urban	Winter	2	48	Monday	February	1.07106	76.1382	14.0799	11.9567	30.4395	0.950904	0.899954	52.5326	4.6407	6.57474	1.4926	8.83986	192.427	0	68.1091
1MEOW_W_3	Male	Sukhbaatar	Urban	Winter	3	48	Tuesday	February	1.33882	252.881	26.1458	55.9103	49.4893	2.58755	1.08398	69.1393	17.1585	27.3156	2.51358	45.1978	257.692	0	112.269
2MEOW_S_1	Male	Sukhbaatar	Urban	Summer	1	53	Monday	August	0.997193	112.551	11.846	20.8907	34.2435	1.09525	0.960645	143.975	6.23747	26.77	3.52793	18.535	140.892	16.144	23.5565
2MEOW_S_2	Male	Sukhbaatar	Urban	Summer	2	53	Tuesday	August	1.24649	125.78	10.9959	16.5457	14.2553	0.808002	0.651583	122.677	5.22393	8.51602	2.87152	13.8869	167.513	16.824	20.4839
2MEOW_S_3	Male	Sukhbaatar	Urban	Summer	3	53	Wedesday	August	1.24649	184.434	18.8049	25.9414	80.6184	1.58133	0.687192	116.341	10.3558	25.2455	5.02017	25.7505	398.547	11	175.522
2MEOW_W_1	Male	Sukhbaatar	Urban	Winter	1	53	Sunday	February	1.07106	373.473	37.9225	55.4315	7643.71	6.66692	1.46226	10920.1	83.5114	37.6679	11.2289	28.6634	64.0606	0	12.1623
2MEOW_W_2	Male	Sukhbaatar	Urban	Winter	2	53	Monday	February	1.07106	47.0301	9.9625	12.027	103.207	0.781526	0.347298	187.974	5.78609	13.4662	4.32748	11.8013	158.431	10.524	83.344
2MEOW_W_3	Male	Sukhbaatar	Urban	Winter	3	53	Tuesday	February	1.33882	131.4	19.3011	29.253	461.098	2.18834	1.07238	559.028	15.6411	51.3804	5.69215	32.9271	211.603	0	170.785
3MEOW_S_1	Male	Sukhbaatar	Urban	Summer	1	52	Monday	August	0.997193	0	0	0	0	0	0	0	0	0	0	0.0491	0	0	0
3MEOW_S_2	Male	Sukhbaatar	Urban	Summer	2	52	Tuesday	August	1.24649	62.6251	10.3647	13.6879	263.295	1.53662	0.707837	326.554	5.48699	32.9993	3.88032	12.9422	183.793	7.068	295.994
3MEOW_S_3	Male	Sukhbaatar	Urban	Summer	3	52	Wedesday	August	1.24649	133.853	11.676	19.9764	159.54	1.25551	1.02768	286.301	6.11358	23.0859	2.14181	13.9412	215.352	0	79.3753
3MEOW_W_1	Male	Sukhbaatar	Urban	Winter	1	52	Sunday	February	1.07106	81.4222	6.91985	6.08964	21.8696	0.681511	0.157169	22.119	3.8884	3.75521	1.58483	9.99895	141.354	0	48.9501
4MEOW_S_1	Male	Sukhbaatar	Urban	Summer	1	25	Monday	August	0.723936	97.5857	16.7703	19.2932	131.277	1.26723	0.763435	239.666	7.9943	19.0943	7.20019	21.2017	327.356	15.768	66.8171
4MEOW_S_2	Male	Sukhbaatar	Urban	Summer	2	25	Tuesday	August	0.90492	145.14	19.2643	22.7592	347.087	1.86477	1.61167	679.561	7.70983	226.682	5.09336	18.1786	282.373	11.728	132.33
4MEOW_S_3	Male	Sukhbaatar	Urban	Summer	3	25	Wedesday	August	0.90492	179.853	18.9981	17.8185	1099.35	1.97837	1.27137	1170.85	5.94044	19.5311	5.26599	12.814	365.486	12.384	96.5551
4MEOW_W_1	Male	Sukhbaatar	Urban	Winter	1	25	Sunday	February	0.732485	65.9042	17.4805	16.4065	78.279	1.35625	0.867298	306.668	7.5197	14.0765	5.85859	9.42593	221.039	19.484	168.096
4MEOW_W_2	Male	Sukhbaatar	Urban	Winter	2	25	Monday	February	0.732485	31.4353	5.36198	6.73502	139.4	0.757016	0.518996	150.679	2.17833	14.5308	1.13998	5.52134	64.6062	0	107.797
4MEOW_W_3	Male	Sukhbaatar	Urban	Winter	3	25	Tuesday	February	0.915606	58.6232	13.5115	13.3399	280.126	1.24817	0.430857	317.332	7.15957	27.3862	3.92332	18.5808	264.315	59.55	164.885
5MEOW_S_1	Male	Sukhbaatar	Urban	Summer	1	55	Monday	August	0.997193	369.606	35.5984	46.2118	2283.1	3.52973	2.23649	2364.75	26.5807	78.9821	23.1712	34.6435	632.354	64.032	48.1373
5MEOW_S_2	Male	Sukhbaatar	Urban	Summer	2	55	Tuesday	August	1.24649	192.509	15.7941	18.1984	1040.02	1.45792	1.26374	1105.84	10.0079	45.421	6.65397	14.5496	280.78	10.912	0
5MEOW_S_3	Male	Sukhbaatar	Urban	Summer	3	55	Wedesday	August	1.24649	104.523	11.1333	13.8195	431.424	0.917203	0.656859	504.59	4.92393	29.3962	7.87446	11.737	264.623	12.712	0
5MEOW_W_1	Male	Sukhbaatar	Urban	Winter	1	55	Sunday	February	1.07106	55.1272	10.47	12.6902	232.146	0.929866	0.600197	406.45	6.09102	16.2839	3.39743	14.9868	176.464	7.8	73.536
5MEOW_W_2	Male	Sukhbaatar	Urban	Winter	2	55	Monday	February	1.07106	64.7253	7.39905	13.7007	109.279	0.758346	1.02019	318.575	4.18704	28.4484	3.59595	10.0632	3.88865	0	12.5464
5MEOW_W_3	Male	Sukhbaatar	Urban	Winter	3	55	Tuesday	February	1.33882	61.3581	15.7453	16.1943	119.547	1.25898	0.694494	514.127	9.88158	22.6149	4.73149	21.8228	270.107	0	90.9603
6MEOW_S_1	Male	Sukhbaatar	Urban	Summer	1	34	Monday	August	2.15825	195.32	20.2582	25.249	214.414	2.0557	0.863047	344.946	9.95413	36.4465	13.1383	25.243	486.509	30.964	339.561
6MEOW_S_2	Male	Sukhbaatar	Urban	Summer	2	34	Tuesday	August	2.69781	215.37	26.7377	38.3658	247.847	2.72182	1.32614	283.429	13.6587	39.9656	5.69408	35.8656	562.805	5.72	165.444
6MEOW_S_3	Male	Sukhbaatar	Urban	Summer	3	34	Wedesday	August	2.69781	181.687	23.1153	39.3683	170.939	2.41131	1.53686	319.771	12.2207	34.9778	8.24855	32.2996	345.164	26.952	222.161
7MEOW_S_1	Male	Sukhbaatar	Urban	Summer	1	52	Monday	August	0.997193	99.3536	17.7824	31.8859	611.973	2.35122	1.21793	678.757	16.2372	30.1899	3.20017	28.5129	150.402	0	70.8669
7MEOW_S_2	Male	Sukhbaatar	Urban	Summer	2	52	Tuesday	August	1.24649	90.2848	13.8093	20.6244	970.513	1.85023	0.934255	1019.48	16.6436	23.647	2.3357	15.4179	168.532	0	145.659
7MEOW_S_3	Male	Sukhbaatar	Urban	Summer	3	52	Wedesday	August	1.24649	53.2672	9.23597	11.7528	1354.93	1.56846	0.607103	1378.66	17.5329	22.2651	4.03135	8.90451	135.236	5.292	112.727
7MEOW_W_1	Male	Sukhbaatar	Urban	Winter	1	52	Sunday	February	1.07106	136.196	28.3637	24.0024	3559.37	2.38159	1.70024	3564.76	33.6673	113.394	10.3695	22.194	376.639	0	0
7MEOW_W_2	Male	Sukhbaatar	Urban	Winter	2	52	Monday	February	1.07106	133.345	20.0107	19.2437	2686.27	2.08942	1.63627	2686.55	23.7688	82.9691	7.9656	21.3818	324.415	0	0
7MEOW_W_3	Male	Sukhbaatar	Urban	Winter	3	52	Tuesday	February	1.33882	173.142	24.0041	23.3406	3795.57	2.7008	2.15203	3795.84	31.741	116.773	10.5099	26.0535	377.153	0	0
8MEOW_S_1	Male	Sukhbaatar	Urban	Summer	1	32	Monday	August	0.723936	66.9418	5.88866	9.99821	68.4122	1.04038	0.516818	82.4464	3.53755	12.4536	0.766447	8.63581	49.3869	0	148.296
8MEOW_S_2	Male	Sukhbaatar	Urban	Summer	2	32	Tuesday	August	0.90492	92.9305	11.6098	19.249	55.2696	1.33422	0.862317	98.5336	6.08799	15.3677	1.60545	15.4037	158.767	0	125.504
8MEOW_S_3	Male	Sukhbaatar	Urban	Summer	3	32	Wedesday	August	0.90492	62.6132	9.03903	13.5227	52.3265	0.732615	0.264035	116.414	5.6073	12.6631	5.67464	13.7789	223.14	11.256	68.2739
8MEOW_W_1	Male	Sukhbaatar	Urban	Winter	1	32	Sunday	February	0.732485	119.735	19.3248	16.3192	237.446	1.66769	0.943851	527.338	7.66957	65.1456	9.01392	10.5546	211.498	19.484	201.255
8MEOW_W_2	Male	Sukhbaatar	Urban	Winter	2	32	Monday	February	0.732485	95.769	12.037	13.6118	255.753	1.37374	1.30899	277.67	1.57351	25.0961	1.98182	5.44567	225.532	0	116.502
8MEOW_W_3	Male	Sukhbaatar	Urban	Winter	3	32	Tuesday	February	0.915606	57.9183	8.98162	11.0503	236.107	1.23704	0.976325	249.355	2.45973	24.244	1.66147	6.64842	133.717	0	165.28
9MEOW_S_1	Male	Sukhbaatar	Urban	Summer	1	36	Monday	August	2.15825	52.8439	8.34029	13.0145	107.741	0.677832	0.304505	173.343	4.85228	16.6211	3.17684	12.6598	116.64	2.436	42.5042
9MEOW_S_2	Male	Sukhbaatar	Urban	Summer	2	36	Tuesday	August	2.69781	116.923	14.1034	30.5842	173.436	1.8906	0.869564	347.083	7.37704	26.3974	7.47566	22.8298	149.781	23.032	254.212
9MEOW_S_3	Male	Sukhbaatar	Urban	Summer	3	36	Wedesday	August	2.69781	18.0231	2.94155	4.51052	2.01287	0.173354	0.084459	29.1456	1.75011	2.63944	0.618365	4.48336	54.0128	0	0
9MEOW_W_1	Male	Sukhbaatar	Urban	Winter	1	36	Sunday	February	2.45861	57.1652	20.8414	19.4026	0	1.03367	0.590504	125.311	11.2103	2.03993	3.05847	18.2274	221.939	19.056	0
9MEOW_W_2	Male	Sukhbaatar	Urban	Winter	2	36	Monday	February	2.45861	63.4453	25.8564	21.8499	25.228	1.27623	0.603535	96.2671	13.2898	5.37873	4.66952	21.2491	397.12	0	51.2099
9MEOW_W_3	Male	Sukhbaatar	Urban	Winter	3	36	Tuesday	February	3.07327	95.0465	19.6973	23.3888	65.3929	1.55592	0.703466	199.609	12.4692	13.148	4.19434	23.1715	266.647	0	153.416
10FCOW_S_1	Female	Tuv	Urban	Summer	1	41	Friday	August	1.2183	146.705	29.6147	27.6507	43.4895	1.83708	1.63623	125.303	4.5449	6.58205	32.4353	33.4247	178.449	57.72	102.804
10FCOW_S_2	Female	Tuv	Urban	Summer	2	41	Saturday	August	1.2183	66.7769	8.41152	13.4984	435.697	1.32369	0.425844	547.533	6.394	27.9694	2.28646	14.2114	199.364	0	97.8326
10FCOW_S_3	Female	Tuv	Urban	Summer	3	41	Sunday	August	0.974643	136.771	19.9388	38.845	432.95	2.42869	0.728968	503.826	18.2421	60.1963	7.75244	40.1696	224.337	10.64	329.911
10FCOW_W_1	Female	Tuv	Urban	Winter	1	41	Thursday	January	1.28518	182.28	22.7603	28.1518	909.7	2.12718	1.99238	1067.88	14.535	56.663	6.12695	20.5665	340.566	35.55	31.238
10FCOW_W_2	Female	Tuv	Urban	Winter	2	41	Friday	January	1.28518	82.6286	11.084	15.0029	858.24	1.09164	0.497748	979.552	11.5758	38.7361	3.50857	17.067	177.041	28.08	47.1131
10FCOW_W_3	Female	Tuv	Urban	Winter	3	41	Saturday	January	1.28518	56.2159	8.66656	11.2668	937.848	0.870714	0.424972	940.352	11.4129	37.4777	3.39621	14.4636	112.321	0	30.5979
1FCOW_S_1	Female	Tuv	Urban	Summer	1	50	Friday	August	1.04824	125.117	9.00359	10.805	146.4	0.974335	0.383274	195.253	4.77998	11.0358	5.00526	10.8796	180.334	10.712	59.1474
1FCOW_S_2	Female	Tuv	Urban	Summer	2	50	Saturday	August	1.04824	274.47	18.4462	20.7252	72.8639	1.5082	0.890522	104.726	6.58919	16.8572	6.68449	18.7409	466.218	49.34	156.256
1FCOW_S_3	Female	Tuv	Urban	Summer	3	50	Sunday	August	0.838589	139.977	4.71286	8.75174	195.117	0.838185	0.507111	305.274	3.16879	20.8999	1.75542	8.41697	91.291	4.248	111.095
1FCOW_W_1	Female	Tuv	Urban	Winter	1	50	Thursday	January	1.06765	204.677	12.8382	24.897	64.9316	1.45303	0.824634	311.933	9.46996	20.4748	3.42104	22.6072	86.6176	14.088	127.629
1FCOW_W_2	Female	Tuv	Urban	Winter	2	50	Friday	January	1.06765	81.3077	6.86711	8.40536	100.345	0.842747	0.341163	106.654	2.96977	13.7553	1.14369	7.82586	139.403	29.25	104.051
1FCOW_W_3	Female	Tuv	Urban	Winter	3	50	Saturday	January	1.06765	63.9573	6.4732	8.41465	142.729	0.668303	0.344729	162.666	2.83129	15.6131	1.642	7.63315	125.615	27.642	55.8187
2FCOW_S_1	Female	Tuv	Urban	Summer	1	49	Friday	August	1.04824	89.218	9.66303	12.1851	354.82	1.10351	0.425031	435.868	5.14225	24.6945	3.10713	13.8882	149.354	0	0
2FCOW_S_2	Female	Tuv	Urban	Summer	2	49	Saturday	August	1.04824	260.511	21.5278	53.5708	148.906	2.16779	0.862435	279.523	9.94175	18.832	5.85678	30.9927	322.181	1.21	70.1925
2FCOW_S_3	Female	Tuv	Urban	Summer	3	49	Sunday	August	0.838589	105.811	8.30091	20.0715	122.413	1.00532	0.564441	389.348	7.11158	19.5573	2.79229	18.3899	3.5272	23.808	57.355
2FCOW_W_1	Female	Tuv	Urban	Winter	1	49	Monday	February	0.854118	74.2526	8.55284	16.573	45.1431	0.907931	0.310149	55.7083	7.98369	10.4006	1.11093	18.9876	24.3286	0	26.5043
2FCOW_W_2	Female	Tuv	Urban	Winter	2	49	Tuesday	February	1.06765	40.0316	5.67977	6.62025	25.019	0.391526	0.146139	72.6525	2.80537	4.91675	5.33009	7.34623	152.698	6.608	29.8297
2FCOW_W_3	Female	Tuv	Urban	Winter	3	49	Wedesday	February	1.06765	55.1803	3.14642	3.62045	127.041	0.395551	0.238838	180.391	2.43605	5.82562	7.91098	5.00262	0.00857168	6.984	36.8711
3FCOW_S_1	Female	Tuv	Urban	Summer	1	48	Friday	August	1.04824	128.206	33.0174	26.9346	76.7745	1.90347	0.929354	664.474	13.5441	7.5061	26.0864	37.1106	855.51	50.4	48.7774
3FCOW_S_2	Female	Tuv	Urban	Summer	2	48	Saturday	August	1.04824	89.5288	14.0446	14.1305	1362.17	2.67984	1.06725	1435.33	4.49323	77.1776	5.53932	10.6282	161.233	0	128.665
3FCOW_S_3	Female	Tuv	Urban	Summer	3	48	Sunday	August	0.838589	80.8481	14.923	14.0902	540.568	1.9841	1.22803	611.338	4.911	48.8607	8.46442	12.9285	320.708	12.124	315.197
3FCOW_W_1	Female	Tuv	Urban	Winter	1	48	Thursday	January	1.06765	60.6598	13.2751	13.3193	187.054	0.974525	0.805135	234.951	4.08229	18.3846	5.62926	7.33568	287.147	8.904	69.3776
3FCOW_W_2	Female	Tuv	Urban	Winter	2	48	Friday	January	1.06765	77.9429	12.44	13.6439	348.972	1.3174	0.629162	530.68	9.64033	67.0033	2.44425	10.7982	8.02911	27.216	108.503
3FCOW_W_3	Female	Tuv	Urban	Winter	3	48	Saturday	January	1.06765	138.696	23.0369	32.1081	317.38	2.04013	0.677517	333.703	16.6441	38.5733	5.64284	40.8789	350.337	0	125.592
4FCOW_S_1	Female	Tuv	Urban	Summer	1	25	Friday	August	1.82429	85.3139	13.978	18.9282	66.2282	1.36798	0.818097	133.976	5.45419	14.1899	4.97028	15.6744	395.459	7.224	131.872
4FCOW_S_2	Female	Tuv	Urban	Summer	2	25	Saturday	August	1.82429	258.025	19.6616	29.7218	294.655	1.85573	1.35547	447.828	10.5991	33.394	7.24348	25.4358	663.159	30.388	136.865
4FCOW_S_3	Female	Tuv	Urban	Summer	3	25	Sunday	August	1.45943	176.203	21.5036	36.163	517.625	2.56706	2.11226	877.854	16.6125	45.0689	4.94641	27.1597	205.74	0	67.8531
5FCOW_S_1	Female	Tuv	Urban	Summer	1	52	Friday	August	1.04824	102.334	6.40161	12.1592	811.971	1.98118	0.677611	967.471	8.01487	38.7111	4.05676	15.2509	135.252	0	182.018
5FCOW_S_2	Female	Tuv	Urban	Summer	2	52	Saturday	August	1.04824	179.693	21.8067	28.0396	213.547	2.35939	0.754299	385.356	11.1498	31.1625	5.8046	27.9309	325.792	48.6	174.373
5FCOW_S_3	Female	Tuv	Urban	Summer	3	52	Sunday	August	0.838589	173.005	10.4317	14.1554	225.479	1.48232	0.792884	447.488	4.28672	21.9449	6.5554	12.0975	24.6303	0	178.21
6FCOW_S_1	Female	Tuv	Urban	Summer	1	37	Friday	August	1.2183	60.4212	7.54429	11.7048	38.3668	0.818725	0.325844	89.8318	3.77696	9.75721	3.82237	9.66818	145.901	5.656	95.8621
6FCOW_S_2	Female	Tuv	Urban	Summer	2	37	Saturday	August	1.2183	97.6539	8.66839	13.0395	53.7071	0.990967	0.87362	677.798	1.9433	14.1418	3.05054	7.02438	96.7312	0	115.854
6FCOW_S_3	Female	Tuv	Urban	Summer	3	37	Sunday	August	0.974643	71.9445	7.8573	12.5421	82.7944	1.15429	0.646237	105.002	3.44993	12.3768	1.35564	10.348	212.968	0	135.421
6FCOW_W_1	Female	Tuv	Urban	Winter	1	37	Monday	January	1.02814	82.0369	8.51337	11.1956	59.485	1.12762	0.64774	95.8831	3.60576	10.4946	1.55542	9.58699	183.217	0	140.74
6FCOW_W_2	Female	Tuv	Urban	Winter	2	37	Tuesday	January	1.28518	52.9534	5.25666	8.42514	63.4749	0.724479	0.271041	97.8623	2.87795	12.5927	1.94922	6.91641	106.766	1.624	103.039
6FCOW_W_3	Female	Tuv	Urban	Winter	3	37	Wedesday	January	1.28518	29.813	3.37242	7.14062	55.1644	0.53451	0.192918	105.099	3.2287	12.0767	0.631298	7.51839	32.9236	6.216	95.2576
7FCOW_S_1	Female	Tuv	Urban	Summer	1	28	Friday	August	1.82429	188.201	25.1991	21.4972	277.253	1.62183	0.792482	362.864	7.85258	29.6827	10.9765	22.9385	884.839	28.056	0
7FCOW_S_2	Female	Tuv	Urban	Summer	2	28	Saturday	August	1.82429	197.408	9.65418	9.79782	408.16	1.86916	0.421468	464.814	5.82521	202.079	5.83926	12.0266	158.151	5.712	0
7FCOW_S_3	Female	Tuv	Urban	Summer	3	28	Sunday	August	1.45943	144.839	5.4865	16.2886	195.373	0.822294	0.34432	281.495	3.419	18.2465	1.93007	9.40164	56.9188	7.152	0
7FCOW_W_1	Female	Tuv	Urban	Winter	1	28	Monday	January	1.41079	63.3753	14.131	19.5961	29.7873	1.45092	0.598704	51.1038	7.07357	5.77552	3.24082	23.702	242.513	0	70.4136
7FCOW_W_2	Female	Tuv	Urban	Winter	2	28	Tuesday	January	1.76348	122.806	16.5765	30.4195	245.414	2.17908	0.486512	684.193	14.2069	86.6637	6.22716	31.8362	150.34	51.294	380
7FCOW_W_3	Female	Tuv	Urban	Winter	3	28	Wedesday	January	1.76348	102.878	23.8882	35.6766	96.0209	2.25727	0.762436	108.949	21.4561	23.7945	6.87404	49.0845	116.7	33.25	218.685
8FCOW_S_1	Female	Tuv	Urban	Summer	1	30	Friday	August	1.82429	45.4643	4.2209	8.43167	102.082	0.475168	0.186353	159.359	3.34797	9.09277	1.5952	7.49494	44.7856	5.28	38.987
8FCOW_S_2	Female	Tuv	Urban	Summer	2	30	Saturday	August	1.82429	121.314	16.6242	20.4458	57.9729	1.05355	1.30913	779.307	6.08718	32.106	9.16333	18.0793	346.567	14.308	0
8FCOW_S_3	Female	Tuv	Urban	Summer	3	30	Sunday	August	1.45943	238.552	9.9635	18.6718	244.584	1.42669	0.816868	476.991	6.07477	23.8986	2.89953	16.6035	309.172	5.28	147.312
9FCOW_S_1	Female	Tuv	Urban	Summer	1	39	Friday	August	1.2183	131.1	12.6223	11.3382	181.723	2.16738	1.17965	1979.03	4.54672	27.5809	3.7664	11.0477	94.9474	23.316	243.842
9FCOW_S_2	Female	Tuv	Urban	Summer	2	39	Saturday	August	1.2183	55.1405	6.45302	9.17568	440.829	1.80237	1.06306	471.902	2.48941	56.8973	2.13907	5.78503	91.9892	0	461.163
9FCOW_S_3	Female	Tuv	Urban	Summer	3	39	Sunday	August	0.974643	181.042	12.7077	12.4683	322.691	3.02051	1.08117	613.822	4.91183	41.6306	4.21745	13.3296	323.411	0	968.571
9FCOW_W_1	Female	Tuv	Urban	Winter	1	39	Monday	January	1.02814	66.1546	4.17874	8.22848	172.14	0.448784	0.296476	304.176	3.16289	14.7025	2.0667	8.59904	3.62423	9.24	0
9FCOW_W_2	Female	Tuv	Urban	Winter	2	39	Tuesday	January	1.28518	77.5124	15.3324	24.7257	238.916	1.68914	0.973522	335.019	9.63365	15.7046	5.04857	23.7877	251.436	0	26.8852
9FCOW_W_3	Female	Tuv	Urban	Winter	3	39	Wedesday	January	1.28518	109.522	10.3329	15.4189	176.304	1.01511	1.03099	227.527	1.67364	35.3806	1.42395	8.50445	141.673	7.248	0
10MCOW_S_1	Male	Tuv	Urban	Summer	1	28	Friday	August	0.90492	133.312	9.39243	13.9811	86.712	0.985743	0.732826	270.752	3.58908	4.77837	6.20333	12.4324	247.461	9.744	0
10MCOW_S_2	Male	Tuv	Urban	Summer	2	28	Saturday	August	0.90492	140.036	17.7058	25.7833	0	1.33888	0.590046	88.5305	8.88574	14.4764	8.13398	25.9422	512.837	13.86	0
10MCOW_S_3	Male	Tuv	Urban	Summer	3	28	Sunday	August	0.723936	160.818	20.0965	32.8661	422.283	1.63789	0.857057	492.202	12.5585	16.4774	6.73548	29.0052	280.405	12.432	0
10MCOW_W_1	Male	Tuv	Urban	Winter	1	28	Monday	January	0.732485	150.895	23.3268	37.098	78.2131	1.86954	1.02548	102.821	14.0394	65.8717	3.749	29.7776	567.15	70.6	120.581
10MCOW_W_2	Male	Tuv	Urban	Winter	2	28	Tuesday	January	0.915606	172.828	21.3556	34.0263	4.63069	1.78913	1.17569	75.777	12.7823	20.6702	14.7638	33.2511	330.456	0	0
10MCOW_W_3	Male	Tuv	Urban	Winter	3	28	Wedesday	January	0.915606	76.2365	35.2325	28.5415	40.2941	1.83572	0.442088	93.1268	30.8234	10.8023	7.14569	17.1239	195.268	11.788	95.2503
1MCOW_S_1	Male	Tuv	Urban	Summer	1	47	Friday	August	1.24649	133.55	17.4835	29.0076	680.12	2.00821	1.19843	774.84	12.7882	69.2596	4.02401	28.2751	189.422	0	0
1MCOW_S_2	Male	Tuv	Urban	Summer	2	47	Saturday	August	1.24649	236.594	21.4077	31.8529	47.8075	1.70252	1.14219	150.891	14.7146	35.8042	2.75745	30.8204	363.311	35.4	98.2988
1MCOW_S_3	Male	Tuv	Urban	Summer	3	47	Sunday	August	0.997193	69.3968	10.0075	16.3712	71.4337	1.29015	1.21814	125.902	6.78303	24.6262	1.92395	14.9344	88.6783	0	28.2934
1MCOW_W_1	Male	Tuv	Urban	Winter	1	47	Monday	January	1.07106	135.757	21.1969	24.2841	142.992	1.88335	0.6775	199.848	15.9265	13.5648	5.51897	37.6813	214.475	0	82.5759
1MCOW_W_2	Male	Tuv	Urban	Winter	2	47	Tuesday	January	1.33882	126.192	11.2565	14.2693	63.9271	1.23009	0.596745	64.8507	9.14038	31.2813	2.64146	20.1009	37.9546	1.92	0
1MCOW_W_3	Male	Tuv	Urban	Winter	3	47	Wedesday	January	1.33882	137.74	18.1802	23.2621	107.838	1.81315	0.726576	417.694	10.5651	24.002	4.4646	27.8927	270.348	7.2	244.527
2MCOW_S_1	Male	Tuv	Urban	Summer	1	24	Friday	August	0.90492	290.826	22.7193	36.105	96.2463	2.20492	1.98442	198.222	13.872	61.1952	8.06296	37.4053	339.371	11.156	63.6282
2MCOW_S_2	Male	Tuv	Urban	Summer	2	24	Saturday	August	0.90492	257.285	23.4595	50.4992	43.7242	2.99015	0.807878	129.303	14.8274	19.8546	11.4983	26.0229	553.106	81.12	93.714
2MCOW_S_3	Male	Tuv	Urban	Summer	3	24	Sunday	August	0.723936	306.437	12.2176	19.778	126.826	1.33809	3.09898	337.921	4.25035	105.68	3.97504	19.3554	133.209	2.376	64.5228
2MCOW_W_1	Male	Tuv	Urban	Winter	1	24	Sunday	January	0.732485	139.853	44.4535	53.0594	49.283	3.22332	2.02087	106.58	16.7482	11.9141	5.32895	39.2375	587.605	6.144	104.212
2MCOW_W_2	Male	Tuv	Urban	Winter	2	24	Monday	January	0.732485	134.256	12.7513	20.4597	102.189	1.36567	0.850059	156.861	6.45984	63.81	2.33008	15.8482	213.113	0	24.3247
2MCOW_W_3	Male	Tuv	Urban	Winter	3	24	Tuesday	January	0.915606	190.755	13.096	30.453	119.499	1.50372	0.501551	217.187	10.9131	56.6523	4.00238	25.9412	334.683	26.376	40.8399
3MCOW_S_1	Male	Tuv	Urban	Summer	1	29	Friday	August	0.90492	718.906	31.089	79.0907	195.091	4.51435	5.83402	246.98	11.9106	71.8125	7.63678	26.119	432.149	0	75.9804
3MCOW_S_2	Male	Tuv	Urban	Summer	2	29	Saturday	August	0.90492	428.883	71.7931	99.2208	45.5405	7.16941	4.31574	211.899	61.1424	96.1833	16.0383	76.9329	485.593	25.2	71.6938
3MCOW_S_3	Male	Tuv	Urban	Summer	3	29	Sunday	August	0.723936	250.765	35.227	64.8952	1.91558	2.67361	0.973179	154.017	34.5107	36.1964	3.23072	52.5368	101.983	34.4	0
3MCOW_W_1	Male	Tuv	Urban	Winter	1	29	Thursday	January	0.915606	71.1513	21.5712	17.5533	5.06991	0.954627	0.525558	152.585	9.65741	1.4076	10.6046	18.2771	428.681	17.668	0
3MCOW_W_2	Male	Tuv	Urban	Winter	2	29	Friday	January	0.915606	167.435	27.5947	33.3003	0	2.1887	1.25017	265.766	15.9672	3.17694	6.78952	42.292	309.337	38.88	0
3MCOW_W_3	Male	Tuv	Urban	Winter	3	29	Saturday	January	0.915606	97.2174	23.9585	22.1502	81.0242	1.47768	0.609721	163.344	12.9409	9.03747	6.27627	33.524	475.351	0	31.4941
4MCOW_S_1	Male	Tuv	Urban	Summer	1	44	Friday	August	2.69781	91.8704	18.2402	23.0832	24.16	1.83116	1.18243	95.1787	10.3203	17.4483	7.18056	21.1065	280.6	11.256	0
4MCOW_S_2	Male	Tuv	Urban	Summer	2	44	Saturday	August	2.69781	89.7895	15.1911	22.8678	323.29	1.25509	0.6115	334.868	8.85771	46.8974	3.44637	22.4195	325.664	0	67.2129
4MCOW_S_3	Male	Tuv	Urban	Summer	3	44	Sunday	August	2.15825	106.071	27.817	30.2906	98.5482	1.68214	0.800062	284.734	14.0897	17.7654	12.4542	25.8924	579.359	33.256	54.9808
4MCOW_W_1	Male	Tuv	Urban	Winter	1	44	Monday	January	2.45861	136.332	21.8041	19.3629	0.472451	1.20244	0.591764	49.1296	11.2236	1.43936	2.18967	12.7542	206.768	38.25	0
4MCOW_W_2	Male	Tuv	Urban	Winter	2	44	Tuesday	January	3.07327	105.171	18.7573	20.1405	15.9387	1.02726	0.505207	134.755	9.58079	6.61384	2.41441	16.6994	240.09	74.682	0
4MCOW_W_3	Male	Tuv	Urban	Winter	3	44	Wedesday	January	3.07327	106.421	12.8476	26.4231	32.1374	1.02373	0.456388	158.587	10.656	17.8353	1.9464	26.1984	129.61	15.168	0
5MCOW_S_1	Male	Tuv	Urban	Summer	1	27	Friday	August	0.90492	137.852	17.0824	25.01	137.648	2.01356	0.895214	263.76	9.04674	22.5173	3.35435	23.5304	311.733	0	230.885
5MCOW_S_2	Male	Tuv	Urban	Summer	2	27	Saturday	August	0.90492	172.864	19.5728	24.0956	29.6935	1.55997	2.36038	763.261	5.14221	39.7928	3.64613	17.6996	239.653	9.648	0
5MCOW_S_3	Male	Tuv	Urban	Summer	3	27	Sunday	August	0.723936	214.402	28.0028	38.8172	174.385	2.15683	1.26965	385.763	12.913	36.1239	13.9607	33.9536	631.26	31.756	105.62
5MCOW_W_1	Male	Tuv	Urban	Winter	1	27	Monday	January	0.732485	175.411	16.4862	23.393	217.864	1.61605	1.46985	259.12	6.5577	37.0738	4.95441	14.5281	365.659	2.3	6.68968
5MCOW_W_2	Male	Tuv	Urban	Winter	2	27	Tuesday	January	0.915606	62.3173	9.35998	14.0812	87.0648	1.2051	0.284363	116.124	6.37138	18.5587	2.37595	15.0425	186.86	0	270.726
5MCOW_W_3	Male	Tuv	Urban	Winter	3	27	Wedesday	January	0.915606	119.054	8.48023	11.5151	227.698	1.48931	0.715376	302.801	3.96462	28.1013	3.18613	9.59304	138.954	0	336.289
6MCOW_S_1	Male	Tuv	Urban	Summer	1	25	Friday	August	0.90492	43.0733	7.36093	9.96184	2.98995	0.419744	0.181215	56.4682	3.46829	5.27572	2.49946	9.13581	128.927	2.94	0
6MCOW_S_2	Male	Tuv	Urban	Summer	2	25	Saturday	August	0.90492	72.921	12.2378	15.1378	0	0.653298	0.325997	67.6842	6.13544	4.15932	5.77245	10.167	231.97	11.06	0
6MCOW_S_3	Male	Tuv	Urban	Summer	3	25	Sunday	August	0.723936	125.789	17.0847	20.1433	0	1.31135	0.580987	113.523	5.11551	4.43901	11.1461	20.4133	570.541	21.784	0
6MCOW_W_1	Male	Tuv	Urban	Winter	1	25	Thursday	January	0.915606	222.691	29.5581	38.8364	326.064	1.74605	1.16951	725.124	15.2942	37.3532	6.27076	32.4458	982.724	45.84	0
6MCOW_W_2	Male	Tuv	Urban	Winter	2	25	Friday	January	0.915606	146.362	29.9693	32.0359	11.1504	1.74983	1.65226	161.454	10.497	6.54309	4.27426	18.7304	476.808	0	0
6MCOW_W_3	Male	Tuv	Urban	Winter	3	25	Saturday	January	0.915606	173.537	34.0267	38.0896	203.836	2.06264	1.64669	320.876	13.708	25.011	5.88208	26.0057	574.602	0	0
7MCOW_S_1	Male	Tuv	Urban	Summer	1	46	Friday	August	1.24649	113.206	12.8451	16.0883	0	0.769915	0.724939	37.6429	3.31698	25.6893	4.88709	14.3942	428.15	9.15	0
7MCOW_S_2	Male	Tuv	Urban	Summer	2	46	Saturday	August	1.24649	138.432	16.5583	29.6132	0	1.31858	0.621349	84.1211	8.47078	11.332	8.57269	25.3061	456.762	14.772	0
7MCOW_S_3	Male	Tuv	Urban	Summer	3	46	Sunday	August	0.997193	66.9077	11.9776	17.3402	0	0.836517	0.375905	63.7406	5.6729	7.77768	6.87768	16.8588	313.624	12.768	0
7MCOW_W_1	Male	Tuv	Urban	Winter	1	46	Thursday	January	1.33882	235.673	26.1803	38.512	89.9196	2.65804	3.24854	244.923	7.97768	61.5124	3.27292	19.6612	381.242	8.424	0
7MCOW_W_2	Male	Tuv	Urban	Winter	2	46	Friday	January	1.33882	223.347	20.9167	18.6101	1076.89	1.97619	1.30572	1201.96	9.97176	60.515	13.2312	20.7237	426.845	15.988	32.0062
7MCOW_W_3	Male	Tuv	Urban	Winter	3	46	Saturday	January	1.33882	248.327	33.3621	37.5576	288.801	2.55989	1.9134	347.736	16.6031	25.5386	8.57875	37.5334	663.712	6.944	8.07729
8MCOW_S_1	Male	Tuv	Urban	Summer	1	29	Friday	August	0.90492	76.6911	7.68491	10.4694	0	0.6462	0.470803	128.408	1.79738	0.339543	5.81322	9.78637	275.096	10.41	0
8MCOW_S_2	Male	Tuv	Urban	Summer	2	29	Saturday	August	0.90492	116.686	16.5932	26.9724	138.449	1.67119	0.768749	1162.67	9.58411	32.8856	8.96006	26.4892	329.088	26.205	177.343
8MCOW_S_3	Male	Tuv	Urban	Summer	3	29	Sunday	August	0.723936	120.889	23.3675	27.2943	0	1.66667	0.821032	368.225	6.71112	5.41104	15.8559	27.4446	731.936	40.852	0
8MCOW_W_1	Male	Tuv	Urban	Winter	1	29	Monday	January	0.732485	480.717	41.9409	59.9353	47.5886	4.46291	2.49536	332.976	21.4044	18.1361	23.4954	55.0669	435.569	21.252	76.4307
8MCOW_W_2	Male	Tuv	Urban	Winter	2	29	Tuesday	January	0.915606	132.031	12.0698	31.0289	811.27	2.51983	1.70503	916.129	7.09523	69.858	6.47837	19.2412	184.424	12.192	151.453
8MCOW_W_3	Male	Tuv	Urban	Winter	3	29	Wedesday	January	0.915606	117.261	23.4818	19.9706	2.09674	1.08367	0.634977	197.332	11.0678	1.31021	8.64744	12.9763	310.871	30.492	0
9MCOW_S_1	Male	Tuv	Urban	Summer	1	33	Friday	August	2.69781	46.0604	10.0979	8.24075	15.1768	0.592151	0.293995	282.052	4.17258	2.47833	5.46909	12.0607	270.256	23.356	32.9023
9MCOW_S_2	Male	Tuv	Urban	Summer	2	33	Saturday	August	2.69781	126.747	20.097	22.7318	45.8796	1.82664	1.02766	127.921	12.8	6.34649	3.88482	31.0619	211.761	0	108.181
9MCOW_S_3	Male	Tuv	Urban	Summer	3	33	Sunday	August	2.15825	116.101	28.4647	26.2135	44.2291	1.89111	0.907511	219.294	11.4443	8.95042	18.4294	33.1965	818.188	34.328	105.125
9MCOW_W_1	Male	Tuv	Urban	Winter	1	34	Monday	January	2.45861	234.062	19.4084	28.1557	3743.8	2.84229	0.813912	3780.51	49.3908	24.5463	2.05574	15.7842	138.892	1.8	0
9MCOW_W_2	Male	Tuv	Urban	Winter	2	34	Tuesday	January	3.07327	161.427	19.5955	44.9496	86.9656	2.96638	2.109	180.831	11.5775	33.3125	7.97993	30.514	250.397	0	85.7765
9MCOW_W_3	Male	Tuv	Urban	Winter	3	34	Wedesday	January	3.07327	4364.17	135.798	222.341	82085.7	50.5571	5.12595	82141.9	919.497	48.646	7.34615	95.6419	137.64	72.85	0
10FULC_S_1	Female	Ulaanbaatar	Urban	Summer	1	26	Monday	July	1.45943	392.727	32.2112	49.6468	570.378	2.74634	2.32865	672.464	21.3315	40.8628	7.12865	37.6393	474.878	16.192	0
10FULC_S_2	Female	Ulaanbaatar	Urban	Summer	2	26	Tuesday	July	1.82429	365.68	27.4509	35.4084	35.1528	1.91488	1.119	190.59	12.6793	23.1051	7.93292	32.9688	563.558	20.856	58.3792
10FULC_S_3	Female	Ulaanbaatar	Urban	Summer	3	26	Wedesday	July	1.82429	199.938	35.6444	45.6742	488.244	2.51827	0.8908	617.76	18.3459	60.6895	16.6718	47.5401	829.908	155.198	85.3924
10FULG_S_1	Female	Ulaanbaatar	Urban	Summer	1	31	Friday	July	1.82429	294.121	23.4034	25.7831	41.5117	1.57108	1.08521	122.798	7.39659	14.0976	14.2793	23.1213	588.6	41.028	59.4884
10FULG_S_2	Female	Ulaanbaatar	Urban	Summer	2	31	Saturday	July	1.82429	207.086	23.887	35.5117	147.055	2.01727	1.16334	245.499	10.9649	31.4395	15.4737	33.0679	442.071	46.853	29.8297
10FULG_S_3	Female	Ulaanbaatar	Urban	Summer	3	31	Sunday	July	1.45943	241.529	27.6829	29.7628	54.9962	2.09678	1.26523	218.086	7.25672	11.9762	19.0968	27.8611	741.046	79.066	116.246
10FULG_W_1	Female	Ulaanbaatar	Urban	Winter	1	31	Wedesday	January	1.76348	27.0306	4.75549	6.94474	18.0726	0.498733	0.371584	39.27	2.44726	22.3892	0.788279	3.97723	74.2375	0	0
10FULG_W_2	Female	Ulaanbaatar	Urban	Winter	2	31	Thursday	January	1.76348	41.0382	5.32211	7.04972	571.202	1.54895	0.504051	589.371	4.06674	33.6463	1.63887	7.42925	70.4397	0	256.049
10FULG_W_3	Female	Ulaanbaatar	Urban	Winter	3	31	Friday	January	1.76348	33.2328	5.8392	9.7865	19.3516	0.572585	0.32865	57.7896	3.55931	24.0663	1.3528	6.67453	93.0181	0	0
1FULC_S_1	Female	Ulaanbaatar	Urban	Summer	1	52	Friday	July	1.04824	54.7393	9.18705	13.7835	241.629	0.994566	0.366992	274.255	6.56926	24.402	2.13724	14.4042	181.574	0	136.73
1FULC_S_2	Female	Ulaanbaatar	Urban	Summer	2	52	Saturday	July	1.04824	75.2998	11.4973	15.5456	526.727	1.01219	0.709468	586.87	7.45086	32.865	6.48378	13.7469	258.456	10.276	47.6252
1FULC_S_3	Female	Ulaanbaatar	Urban	Summer	3	52	Sunday	July	0.838589	132.499	9.92849	15.7782	440.512	1.64871	0.68248	509.897	6.09789	34.8153	4.80302	15.4087	181.64	9.468	98.3296
1FULC_W_1	Female	Ulaanbaatar	Urban	Winter	1	52	Friday	January	1.06765	44.8472	6.46314	9.93593	423.972	0.791386	0.329667	471.595	4.90445	30.2929	4.70781	10.5718	138.814	5.432	108.166
1FULC_W_2	Female	Ulaanbaatar	Urban	Winter	2	52	Saturday	January	1.06765	57.68	4.83544	6.14956	327.702	1.00866	0.332215	996.138	3.44422	21.1037	3.69461	7.60635	20.6936	5.856	69.7734
1FULC_W_3	Female	Ulaanbaatar	Urban	Winter	3	52	Sunday	January	0.854118	105.366	5.91526	12.5608	388.828	1.34412	0.534571	415.778	6.10885	24.2713	1.93111	13.5412	35.5065	0	97.4268
1FULG_S_1	Female	Ulaanbaatar	Urban	Summer	1	37	Monday	July	0.974643	68.6311	5.01037	5.17945	76.2825	0.775724	0.210988	222.109	3.10417	9.60762	10.1268	7.45942	64.8682	4.475	46.3449
1FULG_S_2	Female	Ulaanbaatar	Urban	Summer	2	37	Tuesday	July	1.2183	161.601	15.3115	26.0392	765.233	2.71531	1.36098	918.38	10.6813	89.2332	8.66463	28.14	193.392	17.208	0
1FULG_S_3	Female	Ulaanbaatar	Urban	Summer	3	37	Wedesday	July	1.2183	147.022	12.1405	13.4149	1702.89	1.69264	1.58219	1766.51	2.49277	194.577	9.8114	8.97362	168.846	7.48	144.976
1FULG_W_1	Female	Ulaanbaatar	Urban	Winter	1	37	Wedesday	January	1.28518	25.4627	3.96458	5.72864	44.0662	0.632539	0.198694	96.2326	3.65004	0	1.06934	9.62843	1.28037	0	0
1FULG_W_2	Female	Ulaanbaatar	Urban	Winter	2	37	Thursday	January	1.28518	32.6146	4.76206	6.9052	60.8002	0.815985	0.247019	123.423	4.39628	0	1.30067	11.7013	1.537	0	0
1FULG_W_3	Female	Ulaanbaatar	Urban	Winter	3	37	Friday	January	1.28518	63.2838	4.50486	6.91942	183.237	1.66985	0.367182	241.882	4.35118	0	1.48976	13.781	1.43937	0	0
2FULC_S_1	Female	Ulaanbaatar	Urban	Summer	1	42	Friday	July	1.2183	124.197	15.3194	21.7838	1046.89	2.46861	1.41725	1111.15	10.25	58.6849	5.02753	19.7258	526.952	0	245.335
2FULC_S_2	Female	Ulaanbaatar	Urban	Summer	2	42	Saturday	July	1.2183	131.497	7.96019	10.3419	314.244	1.12563	0.572989	434.335	4.74057	88.2217	3.58203	11.9158	61.8991	14.16	0
2FULC_S_3	Female	Ulaanbaatar	Urban	Summer	3	42	Sunday	July	0.974643	102.939	18.6029	16.4314	660.241	1.24105	0.696558	798.428	10.3231	17.3364	13.4684	23.0768	563.569	49.05	0
2FULC_W_1	Female	Ulaanbaatar	Urban	Winter	1	42	Wedesday	January	1.28518	74.8285	11.952	10.7767	184.203	0.861147	0.601405	250.832	4.30643	14.8199	7.89821	11.3517	297.809	14.336	28.2934
2FULC_W_2	Female	Ulaanbaatar	Urban	Winter	2	42	Thursday	January	1.28518	174.935	13.218	13.5582	260.423	1.34161	1.10433	387.166	3.16031	20.7689	4.50776	10.453	269.46	36	90.8975
2FULC_W_3	Female	Ulaanbaatar	Urban	Winter	3	42	Friday	January	1.28518	55.1188	4.83099	4.84936	457.965	0.977221	0.32573	615.377	2.78023	20.641	3.7273	7.7164	0.761566	5.544	23.9406
2FULG_S_1	Female	Ulaanbaatar	Urban	Summer	1	47	Friday	July	1.04824	111.135	13.724	18.7453	247.136	1.03213	0.804774	330.901	6.5609	19.8288	2.75028	14.9301	245.45	0	0
2FULG_S_2	Female	Ulaanbaatar	Urban	Summer	2	47	Saturday	July	1.04824	107.903	11.835	17.2465	632.897	1.37988	1.20302	885.325	5.24837	28.1395	4.25508	13.994	201.595	42.4	41.5609
2FULG_S_3	Female	Ulaanbaatar	Urban	Summer	3	47	Sunday	July	0.838589	112.343	6.50322	15.4776	169.602	1.79985	0.546179	250.153	5.33603	27.4879	2.3395	12.3002	45.2929	10.464	385.541
2FULG_W_1	Female	Ulaanbaatar	Urban	Winter	1	47	Tuesday	January	1.06765	117.839	11.3638	14.8676	286.906	1.18935	1.04762	553.937	4.06598	12.5182	3.12495	10.9928	164.75	30.612	62.476
2FULG_W_2	Female	Ulaanbaatar	Urban	Winter	2	47	Wedesday	January	1.06765	75.5776	10.9819	9.57888	231.897	2.02071	0.64929	1355.66	4.76719	24.3568	3.66658	7.6035	100.912	25.896	25.733
2FULG_W_3	Female	Ulaanbaatar	Urban	Winter	3	47	Thursday	January	1.06765	74.1912	11.6669	14.368	68.5007	0.839245	0.821642	115.498	4.3147	10.0173	1.48817	8.30942	137.727	5.304	0
3FULC_S_1	Female	Ulaanbaatar	Urban	Summer	1	47	Friday	July	1.04824	74.1856	5.99756	12.7499	122.328	0.627849	0.455013	130.856	0.126	10.4131	1.60834	3.11509	46.2863	0	0
3FULC_S_2	Female	Ulaanbaatar	Urban	Summer	2	47	Saturday	July	1.04824	122.155	14.4731	18.2169	208.791	1.09143	0.715534	303.021	5.48604	25.0934	9.51483	15.4135	364.057	18.144	22.0202
3FULC_S_3	Female	Ulaanbaatar	Urban	Summer	3	47	Sunday	July	0.838589	93.4641	5.08305	8.44341	177.411	0.584609	0.325836	207.641	2.70881	17.0061	1.63211	7.66507	62.977	0	0
3FULC_W_1	Female	Ulaanbaatar	Urban	Winter	1	47	Wedesday	January	1.06765	84.716	4.67625	4.5056	176.623	0.778854	0.221792	184.721	2.43598	15.3146	1.754	7.31741	78.4761	0	73.6142
3FULC_W_2	Female	Ulaanbaatar	Urban	Winter	2	47	Thursday	January	1.06765	100.809	5.52251	4.52531	58.2743	0.831265	0.242433	61.0002	2.41604	8.52893	1.69232	6.17834	101.945	23.4	117.281
3FULC_W_3	Female	Ulaanbaatar	Urban	Winter	3	47	Friday	January	1.06765	53.3296	4.50381	5.8745	87.0719	0.648309	0.468336	177.086	1.75043	8.0954	1.54352	4.8639	47.3634	0	77.3269
3FULG_S_1	Female	Ulaanbaatar	Urban	Summer	1	52	Friday	July	1.04824	284.096	36.1795	47.7403	189.683	3.92591	3.84041	371.11	7.36143	74.201	4.71501	21.7967	636.708	0	231.597
3FULG_S_2	Female	Ulaanbaatar	Urban	Summer	2	52	Saturday	July	1.04824	397.621	38.6243	50.0905	256.194	4.27026	2.87185	414.33	14.0324	39.5854	12.9165	37.3676	807.083	27.124	173.345
3FULG_S_3	Female	Ulaanbaatar	Urban	Summer	3	52	Sunday	July	0.838589	237.877	27.7436	36.2363	303.224	3.70197	2.38133	389.539	9.47908	88.8941	7.43491	24.9363	542.577	8.904	241.839
4FULC_S_1	Female	Ulaanbaatar	Urban	Summer	1	42	Friday	July	1.2183	141.324	12.4723	14.5221	171.65	1.10991	1.04852	537.032	3.26565	9.87043	8.25636	7.69569	201.454	6.44	25.861
4FULC_S_2	Female	Ulaanbaatar	Urban	Summer	2	42	Saturday	July	1.2183	69.2831	9.87872	17.1814	244.716	1.00769	0.785097	332.087	6.57574	22.8032	2.18038	13.3544	138.382	0	28.4215
4FULC_S_3	Female	Ulaanbaatar	Urban	Summer	3	42	Sunday	July	0.974643	280.127	11.6952	9.75674	234.308	0.923276	0.560838	525.617	2.65611	10.4422	18.1077	8.09268	220.437	18.228	0
4FULC_W_1	Female	Ulaanbaatar	Urban	Winter	1	42	Thursday	January	1.28518	62.3064	10.3862	12.5104	15.3343	0.823913	0.863421	77.7935	5.13234	10.5468	1.69941	10.4889	245.091	7.344	0
4FULC_W_2	Female	Ulaanbaatar	Urban	Winter	2	42	Friday	January	1.28518	42.0201	7.50977	9.31923	40.6191	0.812515	0.34817	103.224	5.27669	6.15223	2.103	13.1923	72.191	8.4	96.0185
4FULC_W_3	Female	Ulaanbaatar	Urban	Winter	3	42	Saturday	January	1.28518	167.282	19.0027	22.9449	559.453	1.9481	1.85017	598.086	6.64787	18.4948	2.1006	11.7869	310.626	0	66.2864
4FULG_S_1	Female	Ulaanbaatar	Urban	Summer	1	37	Friday	July	1.2183	190.68	14.36	26.1782	128.579	1.35216	0.88727	350.703	8.47108	23.5353	4.28926	22.6546	164.174	35.744	0
4FULG_S_2	Female	Ulaanbaatar	Urban	Summer	2	37	Saturday	July	1.2183	162.667	19.6418	30.8259	399.63	1.96341	1.72055	557.063	4.08597	37.5323	8.47566	14.4703	387.123	25.4	0
4FULG_S_3	Female	Ulaanbaatar	Urban	Summer	3	37	Sunday	July	0.974643	89.4689	11.0668	17.6066	114.393	1.19526	0.455156	232.242	6.34776	15.3918	6.61048	17.0955	260.542	19.84	38.6512
4FULG_W_1	Female	Ulaanbaatar	Urban	Winter	1	37	Tuesday	January	1.28518	89.3363	15.6784	18.5671	219.131	1.33695	0.911961	305.315	8.10236	34.8592	3.71494	14.2	289.144	36.148	24.0686
4FULG_W_2	Female	Ulaanbaatar	Urban	Winter	2	37	Wedesday	January	1.28518	74.6417	12.3352	14.2073	98.4993	1.27051	0.523321	165.139	5.5924	10.98	8.20512	14.182	249.288	11.06	74.8944
4FULG_W_3	Female	Ulaanbaatar	Urban	Winter	3	37	Thursday	January	1.28518	78.8535	11.5722	15.7589	164.212	1.39483	0.743523	231.271	6.57646	14.3801	7.31905	14.7695	341.111	12.936	21.1241
5FULC_S_1	Female	Ulaanbaatar	Urban	Summer	1	27	Monday	July	1.45943	67.5232	5.58516	9.93269	155.53	0.541819	0.454078	412.636	4.00147	10.6907	3.94024	10.7215	9.77765	0	0
5FULC_S_2	Female	Ulaanbaatar	Urban	Summer	2	27	Tuesday	July	1.82429	129.367	16.1314	14.8386	128.153	1.71876	0.610008	258.253	7.79794	1.30179	7.41852	22.9171	323.827	8.484	0
5FULC_S_3	Female	Ulaanbaatar	Urban	Summer	3	27	Wedesday	July	1.82429	72.3132	9.38406	15.6506	0	0.632468	0.275689	64.9121	6.07133	9.23588	3.06939	15.4645	175.978	3.192	0
5FULC_W_1	Female	Ulaanbaatar	Urban	Winter	1	27	Saturday	January	1.76348	70.186	7.62227	8.7479	105.063	0.71714	0.358534	174.742	4.5283	7.74461	6.90509	11.558	113.338	10.2	38.4074
5FULC_W_2	Female	Ulaanbaatar	Urban	Winter	2	27	Sunday	January	1.41079	100.663	7.77611	11.2789	211.52	0.693556	0.515182	468.851	4.12248	17.6808	5.56486	11.5409	117.666	13.648	0
5FULC_W_3	Female	Ulaanbaatar	Urban	Winter	3	27	Monday	January	1.41079	66.7317	5.11847	6.9642	344.218	0.805268	0.382873	395.403	4.19138	46.7462	2.13128	7.23248	51.0452	9.075	45.0016
5FULG_S_1	Female	Ulaanbaatar	Urban	Summer	1	27	Friday	July	1.82429	68.2936	7.32634	13.7952	240.09	0.690782	0.424563	313.531	4.96342	24.0762	3.39882	13.1826	78.1986	0	0
5FULG_S_2	Female	Ulaanbaatar	Urban	Summer	2	27	Saturday	July	1.82429	145.877	24.1235	36.292	107.222	1.54215	0.583135	205.407	13.8385	30.1401	10.1137	35.455	540.49	12.964	27.7813
5FULG_S_3	Female	Ulaanbaatar	Urban	Summer	3	27	Sunday	July	1.45943	64.5914	9.84697	15.013	13.8538	0.769893	0.41333	74.8236	5.34436	12.9976	1.99593	14.6101	228.014	35.55	32.9052
5FULG_W_1	Female	Ulaanbaatar	Urban	Winter	1	27	Wedesday	January	1.76348	71.1055	4.21636	6.82859	14.8613	0.439179	0.395349	56.9898	1.57981	4.69446	2.02857	4.2865	33.4398	6.312	4.76305
5FULG_W_2	Female	Ulaanbaatar	Urban	Winter	2	27	Thursday	January	1.76348	88.974	13.1496	16.3794	77.3803	1.44315	1.1681	118.652	3.08203	12.6224	4.43105	9.67504	318.048	7.924	42.3263
5FULG_W_3	Female	Ulaanbaatar	Urban	Winter	3	27	Friday	January	1.76348	53.2245	8.71455	13.3304	70.6624	0.637081	0.305176	151.416	4.98913	12.1873	2.19341	13.2665	190.187	0	26.2409
6FULC_S_1	Female	Ulaanbaatar	Urban	Summer	1	52	Monday	July	0.838589	60.7744	12.3504	13.6301	19.3888	0.953779	0.665729	84.0534	3.17727	5.8003	8.37683	11.1235	296.232	14.364	45.8328
6FULC_S_2	Female	Ulaanbaatar	Urban	Summer	2	52	Tuesday	July	1.04824	51.906	8.43965	11.4893	474.08	0.963345	0.375457	539.418	6.43577	31.0702	6.90033	12.8897	205.589	11.116	123.672
6FULC_S_3	Female	Ulaanbaatar	Urban	Summer	3	52	Wedesday	July	1.04824	32.0781	4.4857	4.13501	22.2761	0.377247	0.150001	54.0413	0.861033	2.97772	1.45694	3.72968	23.4492	4.896	50.4417
6FULC_W_1	Female	Ulaanbaatar	Urban	Winter	1	52	Saturday	January	1.06765	130.409	7.30883	14.1019	1.63202	1.03871	0.960703	7.90098	3.38689	2.50221	20.8615	8.5102	226.608	0	4.95998
6FULC_W_2	Female	Ulaanbaatar	Urban	Winter	2	52	Sunday	January	0.854118	26.3407	9.05926	6.72434	270.623	0.64499	0.294258	323.519	4.57748	18.1042	5.8745	5.26669	168.832	10.164	100.1
6FULC_W_3	Female	Ulaanbaatar	Urban	Winter	3	52	Monday	January	0.854118	62.1934	14.9474	23.5635	101.674	1.56003	0.994325	121.652	6.32075	3.6151	7.00831	20.5858	128.421	4.396	0
6FULG_S_1	Female	Ulaanbaatar	Urban	Summer	1	37	Monday	July	0.974643	45.1701	4.72291	9.0784	27.8259	0.638212	0.279134	103.206	3.07099	6.76733	0.951501	9.50565	118.79	9.12	66.0912
6FULG_S_2	Female	Ulaanbaatar	Urban	Summer	2	37	Tuesday	July	1.2183	322.753	25.3946	26.6878	624.839	3.20691	1.82052	737.628	7.82783	257.728	9.96968	19.2398	365.079	31.77	34.5667
6FULG_S_3	Female	Ulaanbaatar	Urban	Summer	3	37	Wedesday	July	1.2183	246.907	23.5226	33.1469	243.564	1.83432	1.40834	554.376	9.3638	35.9263	8.54845	25.427	472.949	55.358	0
6FULG_W_1	Female	Ulaanbaatar	Urban	Winter	1	37	Wedesday	January	1.28518	78.4595	11.4861	16.0311	12.4565	0.825638	0.322807	108.784	6.70322	8.61439	7.58945	17.4995	244.535	18.092	29.4457
6FULG_W_2	Female	Ulaanbaatar	Urban	Winter	2	37	Thursday	January	1.28518	168.431	20.1821	17.9074	5.42449	1.10165	0.541127	197.34	8.54041	1.62677	12.9498	23.659	625.724	36.7	0
6FULG_W_3	Female	Ulaanbaatar	Urban	Winter	3	37	Friday	January	1.28518	227.823	21.8728	25.7421	243.639	2.01785	1.0543	419.21	9.73105	107.543	4.98537	25.3105	292.622	81.734	0
7FULC_S_1	Female	Ulaanbaatar	Urban	Summer	1	37	Friday	July	1.2183	49.7464	2.41034	3.83637	306.17	1.91975	0.911562	310.923	3.47851	10.5906	1.11802	4.57098	62.6543	0	31.8781
7FULC_S_2	Female	Ulaanbaatar	Urban	Summer	2	37	Saturday	July	1.2183	56.1937	7.5228	5.09099	128.094	1.17892	0.218484	145.791	2.84289	4.53561	7.47196	6.63672	50.7324	0	49.9296
7FULC_S_3	Female	Ulaanbaatar	Urban	Summer	3	37	Sunday	July	0.974643	66.0003	9.68866	16.5534	8.23213	0.695734	0.316526	131.26	6.05431	10.0081	6.10027	15.6247	202.67	22.748	19.4597
7FULC_W_1	Female	Ulaanbaatar	Urban	Winter	1	37	Wedesday	January	1.28518	46.5926	6.65463	7.81016	43.0713	0.700236	0.471784	50.5322	3.46418	7.07083	1.20217	8.18005	77.7135	0	46.8364
7FULC_W_2	Female	Ulaanbaatar	Urban	Winter	2	37	Thursday	January	1.28518	52.9008	5.36798	5.33772	186.398	0.468019	0.285349	220.663	2.76494	10.7464	3.57524	6.77063	96.1127	4.76	0
7FULC_W_3	Female	Ulaanbaatar	Urban	Winter	3	37	Friday	January	1.28518	225.946	13.1137	16.8903	157.528	1.35013	0.6771	425.24	5.94207	31.7669	7.64298	16.3614	202.616	19.347	0
7FULG_S_1	Female	Ulaanbaatar	Urban	Summer	1	37	Friday	July	1.2183	84.814	6.7763	19.9676	33.5796	0.727463	0.69204	138.089	2.73272	29.9997	3.25978	7.81603	77.8003	2.8	0
7FULG_S_2	Female	Ulaanbaatar	Urban	Summer	2	37	Saturday	July	1.2183	121.97	13.4091	29.7709	74.4049	1.05337	0.626408	177.106	10.2897	14.8834	2.73985	23.8227	170.872	20.574	0
7FULG_S_3	Female	Ulaanbaatar	Urban	Summer	3	37	Sunday	July	0.974643	45.8735	6.73411	10.0917	22.2242	0.565917	0.379682	69.6024	3.34083	25.0963	5.21468	7.9047	129.713	6.02	12.8025
7FULG_W_1	Female	Ulaanbaatar	Urban	Winter	1	37	Wedesday	January	1.28518	91.3062	8.4278	12.878	69.725	1.11138	0.520847	277.144	5.18204	6.07145	5.45112	14.034	140.433	10.023	0
7FULG_W_2	Female	Ulaanbaatar	Urban	Winter	2	37	Thursday	January	1.28518	73.71	14.9504	18.7082	28.3686	0.916189	0.328879	76.8054	8.30496	14.4526	5.41264	20.9094	356.399	34.382	30.9567
7FULG_W_3	Female	Ulaanbaatar	Urban	Winter	3	37	Friday	January	1.28518	34.6944	2.90436	8.07431	77.8195	0.695276	0.227331	116.45	1.3031	0.162698	0.808364	5.4523	0.913426	5.928	0
8FULC_S_1	Female	Ulaanbaatar	Urban	Summer	1	52	Sunday	July	0.838589	109.009	10.9623	13.058	91.202	0.980928	0.657653	140.125	3.26418	13.4439	5.39948	9.79599	241.936	10.556	0
8FULC_S_2	Female	Ulaanbaatar	Urban	Summer	2	52	Monday	July	0.838589	59.4028	5.68613	10.3404	424.69	0.96937	0.350576	453.226	5.56286	40.5423	2.24678	10.9911	87.7396	1.848	173.649
8FULC_S_3	Female	Ulaanbaatar	Urban	Summer	3	52	Tuesday	July	1.04824	66.0065	3.71021	5.14731	255.773	0.452606	0.259627	338.851	3.05806	13.427	1.77825	6.95432	28.5857	10.392	0
8FULC_W_1	Female	Ulaanbaatar	Urban	Winter	1	52	Wedesday	January	1.06765	101.917	6.61885	9.41304	164.05	0.591287	0.422644	271.492	3.27856	23.2245	4.69828	9.5242	94.9493	12.196	46.4729
8FULC_W_2	Female	Ulaanbaatar	Urban	Winter	2	52	Thursday	January	1.06765	32.7323	3.55899	4.65063	43.0008	0.412802	0.223776	48.2144	1.62607	6.99093	0.636692	4.49728	54.915	0	40.9679
8FULC_W_3	Female	Ulaanbaatar	Urban	Winter	3	52	Friday	January	1.06765	107.505	9.87971	11.7779	64.5841	1.02363	0.768469	259.945	3.86763	8.21021	4.39984	11.2825	62.2765	15.318	33.6705
8FULG_S_1	Female	Ulaanbaatar	Urban	Summer	1	27	Monday	July	1.45943	89.2639	13.5823	16.8474	153.453	1.18532	1.04458	198.003	4.63283	17.782	3.41248	11.2927	233.612	0	37.6076
8FULG_S_2	Female	Ulaanbaatar	Urban	Summer	2	27	Tuesday	July	1.82429	126.308	17.9751	28.2464	249.597	1.51426	0.935217	353.364	8.10624	20.122	9.50772	19.9787	393.111	17.08	63.5002
8FULG_S_3	Female	Ulaanbaatar	Urban	Summer	3	27	Wedesday	July	1.82429	168.289	20.0296	26.9991	330.766	1.91672	0.927474	383.326	10.6478	151.147	8.09032	25.1965	275.766	20.827	0
8FULG_W_1	Female	Ulaanbaatar	Urban	Winter	1	27	Wedesday	January	1.76348	61.8203	14.4876	16.982	232.795	1.65552	0.610687	271.169	5.05261	23.0803	6.08684	18.8786	337.301	41.008	216.927
8FULG_W_2	Female	Ulaanbaatar	Urban	Winter	2	27	Thursday	January	1.76348	42.6928	6.72532	8.54078	402.897	1.24749	0.420938	454.011	3.02139	31.03	6.20936	8.74083	153.645	9.24	266.211
8FULG_W_3	Female	Ulaanbaatar	Urban	Winter	3	27	Friday	January	1.76348	64.0099	7.67816	9.84347	245.153	1.22265	0.416418	1152.11	4.59778	17.1916	6.0082	10.4449	74.9765	4.944	48.6494
9FULC_S_1	Female	Ulaanbaatar	Urban	Summer	1	52	Monday	July	0.838589	73.1693	12.1142	11.3412	323.89	1.97364	0.852309	378.286	6.12566	33.5554	6.91791	12.3201	279.573	11.872	578.255
9FULC_S_2	Female	Ulaanbaatar	Urban	Summer	2	52	Tuesday	July	1.04824	63.842	8.13099	8.93884	234.412	1.42826	0.700204	265.291	2.96885	19.6904	1.73576	6.84296	101.781	0	280
9FULC_S_3	Female	Ulaanbaatar	Urban	Summer	3	52	Wedesday	July	1.04824	65.1424	6.59743	10.6312	312.833	1.80251	0.497286	328.896	4.91025	34.0772	1.5028	10.0437	63.7787	0	522
9FULC_W_1	Female	Ulaanbaatar	Urban	Winter	1	52	Monday	January	0.854118	130.387	10.9659	13.5491	443.151	1.29958	1.1224	462.687	4.00942	28.1566	2.45062	9.33149	145.936	0	0
9FULC_W_2	Female	Ulaanbaatar	Urban	Winter	2	52	Tuesday	January	1.06765	70.329	7.14516	7.35378	98.0067	0.323885	0.156761	136.784	3.20463	0.40951	7.61133	7.87275	95.4433	0	0
9FULC_W_3	Female	Ulaanbaatar	Urban	Winter	3	52	Wedesday	January	1.06765	52.5309	9.50016	11.7056	202.516	2.97483	1.87288	267.111	6.97634	13.8832	4.35096	15.4463	91.4657	12.466	31.7501
9FULG_S_1	Female	Ulaanbaatar	Urban	Summer	1	27	Monday	July	1.45943	140.109	11.7283	11.6079	492.675	1.51505	0.99293	533.723	2.76174	147.974	3.44503	6.7815	229.973	13.234	0
9FULG_S_2	Female	Ulaanbaatar	Urban	Summer	2	27	Tuesday	July	1.82429	220.681	18.579	31.8501	557.278	2.29795	0.824718	614.808	14.2548	210.623	8.04329	32.0864	214.262	28.214	0
9FULG_S_3	Female	Ulaanbaatar	Urban	Summer	3	27	Wedesday	July	1.82429	198.901	16.2023	19.5107	535.187	2.49584	0.883133	1045.71	7.72471	137.129	5.98652	20.0825	65.7057	13.648	29.7017
9FULG_W_1	Female	Ulaanbaatar	Urban	Winter	1	27	Wedesday	January	1.76348	126.492	17.2463	23.4262	7708.25	5.03647	0.837424	7750.31	79.7651	26.0864	5.99139	16.6095	211.128	13.708	162.774
9FULG_W_2	Female	Ulaanbaatar	Urban	Winter	2	27	Thursday	January	1.76348	41.3485	6.90197	9.94116	164.241	0.762206	0.373914	178.909	4.45493	14.729	1.32433	9.25977	137.543	0	98.835
9FULG_W_3	Female	Ulaanbaatar	Urban	Winter	3	27	Friday	January	1.76348	59.0113	10.822	13.6125	182.048	0.997824	0.577928	189.619	4.36545	24.258	1.75806	11.3715	231.562	44.85	108.053
10MULC_S_1	Male	Ulaanbaatar	Urban	Summer	1	42	Monday	July	2.15825	199.115	18.1645	31.7214	162.079	2.2366	1.65915	295.205	11.7334	98.1257	6.56855	22.0102	213.511	18.976	77.1989
10MULC_S_2	Male	Ulaanbaatar	Urban	Summer	2	42	Tuesday	July	2.69781	148.814	14.0068	21.8008	3.09059	3.16226	2.23119	155.335	6.09831	9.11932	2.73838	16.8876	236.245	0.58	0
10MULC_S_3	Male	Ulaanbaatar	Urban	Summer	3	42	Wedesday	July	2.69781	236.867	22.3232	40.0791	125.595	3.34371	1.63881	191.561	16.6505	75.0493	10.8736	40.0802	341.724	22.2	0
10MULC_W_1	Male	Ulaanbaatar	Urban	Winter	1	41	Saturday	January	3.07327	276.092	36.8844	66.7515	400.657	4.03572	2.6225	478.811	31.7823	345.836	11.3536	64.6171	582.359	19.116	115.784
10MULC_W_2	Male	Ulaanbaatar	Urban	Winter	2	41	Sunday	January	2.45861	212.436	30.4518	40.494	782.051	2.66958	1.95226	1044.94	13.2387	92.397	12.7294	38.5939	1055.78	123.236	76.8148
10MULC_W_3	Male	Ulaanbaatar	Urban	Winter	3	41	Monday	January	2.45861	284.264	34.0059	52.3784	160.989	3.28441	2.99073	468.033	13.8203	91.8355	4.53442	33.5878	496.821	19.76	25.6049
10MULG_S_1	Male	Ulaanbaatar	Urban	Summer	1	27	Monday	July	0.723936	134.169	25.726	39.6392	19.4519	2.143	2.10288	166.284	21.7066	74.868	9.94244	35.4509	393.011	13.272	30.7259
10MULG_S_2	Male	Ulaanbaatar	Urban	Summer	2	27	Tuesday	July	0.90492	126.867	26.4565	29.9246	0	1.55118	0.684571	186.329	14.1807	7.91879	19.0523	37.0413	605.079	36.512	0
10MULG_S_3	Male	Ulaanbaatar	Urban	Summer	3	27	Wedesday	July	0.90492	86.6672	12.4426	24.54	119.441	1.14578	0.50097	204.413	9.05626	21.9577	3.34078	23.6578	214.375	0	46.9836
10MULG_W_1	Male	Ulaanbaatar	Urban	Winter	1	27	Friday	January	0.915606	252.88	17.9879	21.1729	30.5978	1.49792	0.886063	128.544	9.10908	7.34336	10.101	24.5674	354.919	14.98	62.7321
10MULG_W_2	Male	Ulaanbaatar	Urban	Winter	2	27	Saturday	January	0.915606	217.374	25.0381	27.8329	89.9494	2.34218	1.19889	391.103	13.1304	10.9296	6.56854	36.3464	387.787	15.675	32.0062
10MULG_W_3	Male	Ulaanbaatar	Urban	Winter	3	27	Sunday	January	0.732485	131.202	22.8623	20.1992	71.3418	1.55156	0.585798	182.327	10.7943	9.55329	12.3255	28.4155	505.184	62.684	91.6656
1MULC_S_1	Male	Ulaanbaatar	Urban	Summer	1	27	Friday	July	0.90492	91.5865	18.9958	32.6413	30.0977	1.51608	1.34988	92.9886	10.029	77.3543	4.33578	29.534	297.248	8.28	34.5667
1MULC_S_2	Male	Ulaanbaatar	Urban	Summer	2	27	Saturday	July	0.90492	103.036	18.2492	21.0587	21.7419	1.71807	1.52134	133.298	5.27918	24.3	9.80565	16.4443	278.338	16.716	48.6494
1MULC_S_3	Male	Ulaanbaatar	Urban	Summer	3	27	Sunday	July	0.723936	137.071	20.6602	19.9027	829.801	1.64134	1.20708	935.119	7.0483	0.619085	5.65944	15.7144	290.672	18.936	0
1MULC_W_1	Male	Ulaanbaatar	Urban	Winter	1	27	Sunday	January	0.732485	94.0764	11.9561	15.785	0	0.707886	0.26696	87.6435	6.00169	9.36187	8.97973	15.7721	333.244	22.338	0
1MULC_W_2	Male	Ulaanbaatar	Urban	Winter	2	27	Monday	January	0.732485	60.478	11.3728	13.2004	52.0572	1.11907	0.474803	144.591	5.5167	7.35598	3.19335	16.6839	331.053	0	112.19
1MULC_W_3	Male	Ulaanbaatar	Urban	Winter	3	27	Tuesday	January	0.915606	93.9805	22.3135	23.3528	13.8439	1.19848	0.566906	104.119	12.0347	6.61617	3.21748	18.2371	299.249	9.84	28.1654
1MULG_S_1	Male	Ulaanbaatar	Urban	Summer	1	22	Monday	July	0.723936	113.833	14.5686	17.9664	19.0166	0.879797	0.405807	74.9825	6.79828	12.5216	7.24078	17.6352	364.078	53.296	40.8399
1MULG_S_2	Male	Ulaanbaatar	Urban	Summer	2	22	Tuesday	July	0.90492	401.72	24.9708	26.3009	174.604	1.86162	1.78327	227.972	7.96859	25.108	9.97359	18.1919	495.489	54.168	126.488
1MULG_S_3	Male	Ulaanbaatar	Urban	Summer	3	22	Wedesday	July	0.90492	186.123	23.483	19.6123	607.231	1.99189	0.977506	752.598	12.3417	36.0765	17.7545	25.8434	552.153	37.528	101.652
1MULG_W_1	Male	Ulaanbaatar	Urban	Winter	1	22	Saturday	January	0.915606	112.594	28.2192	29.5595	12.4565	1.86573	0.844945	205.343	17.6801	2.97193	15.2606	44.3663	413.686	53.856	29.4457
1MULG_W_2	Male	Ulaanbaatar	Urban	Winter	2	22	Sunday	January	0.732485	220.302	35.6077	47.4988	521.624	3.8785	3.4967	689.858	15.7385	53.2327	4.6776	33.4073	352.614	32.768	0
1MULG_W_3	Male	Ulaanbaatar	Urban	Winter	3	22	Monday	January	0.732485	368.738	42.7378	53.8236	920.015	4.70786	3.05212	967.015	29.4064	315.516	11.4848	55.9686	274.829	35.01	0
2MULC_S_1	Male	Ulaanbaatar	Urban	Summer	1	32	Thursday	July	0.90492	93.8614	12.9604	14.8121	114.793	1.2602	0.931265	1252.49	4.09662	6.64785	4.1317	10.9393	166.097	27.09	0
2MULC_S_2	Male	Ulaanbaatar	Urban	Summer	2	32	Friday	July	0.90492	82.7567	12.4465	11.4399	135.684	1.32793	0.494387	278.84	4.46824	15.5642	7.94641	13.0232	205.455	19.604	250.037
2MULC_S_3	Male	Ulaanbaatar	Urban	Summer	3	32	Saturday	July	0.90492	104.728	9.31813	9.60679	19.7826	0.679353	0.551324	155.501	2.36513	6.14977	3.15304	8.79641	184.306	2.04	58
2MULC_W_1	Male	Ulaanbaatar	Urban	Winter	1	32	Friday	January	0.915606	87.4214	10.0762	13.7779	152.257	1.61172	0.38446	228.558	7.08176	12.0194	8.11296	16.2219	281.052	16.968	88.78
2MULC_W_2	Male	Ulaanbaatar	Urban	Winter	2	32	Saturday	January	0.915606	78.407	9.58023	15.7222	186.423	1.52459	0.393837	212.381	7.40355	39.4101	3.21275	16.496	165.8	0	489
2MULC_W_3	Male	Ulaanbaatar	Urban	Winter	3	32	Sunday	January	0.732485	114.541	16.9694	30.6983	294.049	2.2833	0.570975	313.829	11.4959	119.333	7.18062	19.7402	16.0396	3.672	298
2MULG_S_1	Male	Ulaanbaatar	Urban	Summer	1	57	Monday	July	0.997193	114.534	13.6273	32.6721	61.48	1.28063	0.534483	198.848	13.0665	22.7055	2.03511	31.3534	49.0459	17.904	0
2MULG_S_2	Male	Ulaanbaatar	Urban	Summer	2	57	Tuesday	July	1.24649	152.509	16.6452	29.2329	563.19	1.65853	1.09828	1080.31	12.7275	24.16	4.12419	28.3946	47.2737	38.64	0
2MULG_S_3	Male	Ulaanbaatar	Urban	Summer	3	57	Wedesday	July	1.24649	106.5	19.5109	24.5494	152.679	1.431	0.721915	206.747	11.7833	228.854	7.63964	25.7529	420.705	11.245	42.2481
2MULG_W_1	Male	Ulaanbaatar	Urban	Winter	1	56	Friday	January	1.33882	84.3704	6.56862	15.3324	95.9785	0.694594	0.480328	417.558	5.09924	13.755	3.03681	13.603	5.50515	9.225	0
2MULG_W_2	Male	Ulaanbaatar	Urban	Winter	2	56	Saturday	January	1.33882	107.823	12.3735	19.9441	347.115	1.35835	0.76766	498.515	5.87454	9.49187	2.41855	15.5849	150.997	33.666	73.6142
2MULG_W_3	Male	Ulaanbaatar	Urban	Winter	3	56	Sunday	January	1.07106	129.081	14.7424	12.4446	239.858	1.28748	0.543266	312.711	5.5738	91.4777	8.22661	8.95918	292.559	15.956	42.985
3MULC_S_1	Male	Ulaanbaatar	Urban	Summer	1	27	Friday	July	0.90492	128.221	37.3327	45.5575	23.8299	2.38744	1.07145	131.053	18.6621	16.1056	15.5162	41.5708	643.479	23.828	56.3308
3MULC_S_2	Male	Ulaanbaatar	Urban	Summer	2	27	Saturday	July	0.90492	174.291	22.4966	34.5445	238.658	1.98495	0.947024	417.454	15.1767	27.7487	7.7992	31.8853	404.579	11.34	138.14
3MULC_S_3	Male	Ulaanbaatar	Urban	Summer	3	27	Sunday	July	0.723936	152.59	27.025	40.1477	29.119	2.38937	1.0818	153.029	11.6318	15.3291	13.8981	40.8563	637.277	22.316	53.8207
3MULC_W_1	Male	Ulaanbaatar	Urban	Winter	1	27	Wedesday	January	0.915606	443.476	31.8371	53.7751	15032	9.5072	1.14757	15977.6	159.574	60.4109	12.8923	24.7347	175.304	28.084	0
3MULC_W_2	Male	Ulaanbaatar	Urban	Winter	2	27	Thursday	January	0.915606	105.967	18.8134	24.335	179.644	1.42335	1.66003	387.787	8.71022	141.07	6.56555	18.6398	197.999	0	12.202
3MULC_W_3	Male	Ulaanbaatar	Urban	Winter	3	27	Friday	January	0.915606	74.0878	7.35899	14.8781	218.59	1.0127	0.514121	401.756	7.12746	13.2777	2.43551	16.765	4.22044	10.632	78.0956
3MULG_S_1	Male	Ulaanbaatar	Urban	Summer	1	37	Monday	July	2.15825	459.713	30.0369	24.2518	1708.48	4.43618	0.807537	1858.63	18.3879	602.157	22.9012	33.2476	493.733	29.764	0
3MULG_S_2	Male	Ulaanbaatar	Urban	Summer	2	37	Tuesday	July	2.69781	125.637	20.9753	26.9564	84.8237	1.35568	1.01579	123.442	10.8195	87.7711	2.99284	25.3513	489.426	97.5	0
3MULG_S_3	Male	Ulaanbaatar	Urban	Summer	3	37	Wedesday	July	2.69781	245.718	14.5497	22.6525	614.018	2.80226	1.32504	754.691	14.7249	343.129	20.136	21.7415	10	31.112	0
3MULG_W_1	Male	Ulaanbaatar	Urban	Winter	1	37	Thursday	January	3.07327	31.4209	4.30196	5.18293	269.541	0.572309	0.394934	280.419	2.5059	17.4118	1.83421	4.4312	69.6146	1.6	70.7976
3MULG_W_2	Male	Ulaanbaatar	Urban	Winter	2	37	Friday	January	3.07327	47.4163	10.1272	9.48526	0	0.451528	0.190852	2403.83	3.69816	4.89859	1.74613	10.5622	141.246	37.08	0
3MULG_W_3	Male	Ulaanbaatar	Urban	Winter	3	37	Saturday	January	3.07327	63.4249	10.3038	19.7668	32.4866	0.978917	0.685105	36.2893	6.9285	18.9473	2.61397	16.5445	10.8851	11.25	15.363
4MULC_S_1	Male	Ulaanbaatar	Urban	Summer	1	37	Friday	July	2.69781	133.918	13.2747	19.2766	313.697	1.5656	0.621754	348.503	7.34505	121.756	4.32828	19.0815	89.3285	10.489	29.7017
4MULC_S_2	Male	Ulaanbaatar	Urban	Summer	2	37	Saturday	July	2.69781	187.175	20.3031	32.4225	320.976	1.96124	0.607416	501.209	14.0505	128.022	10.3354	33.7145	249.523	39.239	39.3036
4MULC_S_3	Male	Ulaanbaatar	Urban	Summer	3	37	Sunday	July	2.15825	97.6937	10.855	21.5758	404.814	2.37089	0.703942	463.953	6.16951	23.4558	3.48686	18.6846	122.255	0.4	157.624
4MULG_S_1	Male	Ulaanbaatar	Urban	Summer	1	52	Monday	July	0.997193	158.608	15.5682	24.0645	236.422	2.24936	1.08699	473.356	9.28873	97.3358	5.38445	21.8522	162.342	12.31	266.163
4MULG_S_2	Male	Ulaanbaatar	Urban	Summer	2	52	Tuesday	July	1.24649	167.891	19.91	39.9425	173.589	1.56742	0.838369	514.718	15.6807	43.7552	7.02135	38.3715	141.192	23.95	0
4MULG_S_3	Male	Ulaanbaatar	Urban	Summer	3	52	Wedesday	July	1.24649	150.422	22.9411	33.6233	286.923	1.64154	0.560481	370.409	15.2281	34.9935	9.39641	34.8444	539.229	14	88.5845
4MULG_W_1	Male	Ulaanbaatar	Urban	Winter	1	52	Saturday	January	1.33882	419.943	50.426	50.8549	2917.59	4.57276	3.4666	2979.32	13.5523	6.34943	8.89121	24.3525	740.391	13.776	0
4MULG_W_2	Male	Ulaanbaatar	Urban	Winter	2	52	Sunday	January	1.07106	65.6511	8.48097	19.4769	50.2503	0.673262	0.391583	104.453	1.5316	6.70045	0.70827	9.21288	53.7262	0	8.53603
4MULG_W_3	Male	Ulaanbaatar	Urban	Winter	3	52	Monday	January	1.07106	57.9354	6.22323	8.31167	140.857	0.523193	0.477412	174.859	1.84414	13.7488	1.44792	5.47454	113.435	0	0
5MULC_S_1	Male	Ulaanbaatar	Urban	Summer	1	52	Monday	July	0.997193	157.065	18.3757	29.3616	41.269	1.66848	1.74752	57.8207	10.1406	46.1685	3.14712	26.4876	289.103	0	97.5548
5MULC_S_2	Male	Ulaanbaatar	Urban	Summer	2	52	Tuesday	July	1.24649	197.626	12.0352	20.7831	143.042	1.64271	1.12117	398.084	6.65608	28.7707	2.9088	17.5053	134.18	15	163.231
5MULC_S_3	Male	Ulaanbaatar	Urban	Summer	3	52	Wedesday	July	1.24649	101.061	8.63091	20.7481	213.825	1.95967	0.605667	382.367	9.54906	36.9348	2.25304	22.0361	3.93567	8.112	414.702
5MULC_W_1	Male	Ulaanbaatar	Urban	Winter	1	52	Saturday	January	1.33882	42.0052	6.3952	8.10839	73.6559	0.954604	0.386252	173.162	4.49434	10.3956	1.9067	11.1402	44.2434	9.672	174.114
5MULC_W_2	Male	Ulaanbaatar	Urban	Winter	2	52	Sunday	January	1.07106	173.564	15.9886	18.2211	29.3541	1.70394	0.917382	859.393	8.1625	4.50158	9.00737	21.7911	251.096	9.66	69.3894
5MULC_W_3	Male	Ulaanbaatar	Urban	Winter	3	52	Monday	January	1.07106	315.332	40.1477	55.2325	46.6593	3.52076	1.67747	236.467	31.863	12.1411	12.5535	76.8381	307.884	19.764	112.84
5MULG_S_1	Male	Ulaanbaatar	Urban	Summer	1	57	Friday	July	1.24649	171.722	9.37323	18.6131	116.296	1.20051	0.928402	363.255	6.17029	47.5313	3.99195	14.2841	110.848	8.102	0
5MULG_S_2	Male	Ulaanbaatar	Urban	Summer	2	57	Saturday	July	1.24649	273.262	19.6172	47.3465	0	1.69201	1.27409	817.238	16.662	23.9906	7.57459	41.9229	98.5051	2.952	0
5MULG_S_3	Male	Ulaanbaatar	Urban	Summer	3	57	Sunday	July	0.997193	52.3119	7.7809	11.2016	242.038	0.810632	0.736444	328.743	3.0953	12.8728	1.68951	9.91206	303.094	39.636	76.2468
5MULG_W_1	Male	Ulaanbaatar	Urban	Winter	1	57	Thursday	January	1.33882	214.929	15.4067	20.6442	72.1706	1.71119	1.40802	155.051	7.30383	88.1703	3.84681	17.0728	318.493	0	139.035
5MULG_W_2	Male	Ulaanbaatar	Urban	Winter	2	57	Friday	January	1.33882	166.858	21.4481	23.1074	576.276	2.48349	1.60412	1816.14	10.5621	158.612	15.6528	25.0161	574.087	16.548	64.5244
5MULG_W_3	Male	Ulaanbaatar	Urban	Winter	3	57	Saturday	January	1.33882	113.778	9.37572	14.9674	203.9	1.01003	0.398282	283.269	3.80816	21.1191	3.18003	10.9226	84.0149	6.192	92.5618
6MULC_S_1	Male	Ulaanbaatar	Urban	Summer	1	27	Friday	July	0.90492	253.666	22.1549	27.1323	712.873	3.61356	1.16207	737.326	10.6597	91.1594	5.6892	29.6821	334.92	77.742	82.5759
6MULC_S_2	Male	Ulaanbaatar	Urban	Summer	2	27	Saturday	July	0.90492	24.5107	3.83507	4.32165	79.672	0.218355	0.144547	101.696	1.19665	10.3407	2.49146	3.7115	63.9997	3.864	0
6MULC_S_3	Male	Ulaanbaatar	Urban	Summer	3	27	Sunday	July	0.723936	82.5861	10.1688	18.4447	89.09	0.760601	0.342072	151.774	7.26981	17.0024	2.41467	18.3938	139.921	0	0
6MULC_W_1	Male	Ulaanbaatar	Urban	Winter	1	27	Wedesday	January	0.915606	65.4774	12.5745	13.4179	9.80274	0.737374	0.405676	59.853	5.39777	6.83595	6.33283	11.2261	269.484	11.116	23.1725
6MULC_W_2	Male	Ulaanbaatar	Urban	Winter	2	27	Thursday	January	0.915606	148.181	20.2686	14.1506	166.347	2.04092	0.783687	989.214	6.89089	83.5471	10.688	12.0277	394.125	10.584	62.092
6MULC_W_3	Male	Ulaanbaatar	Urban	Winter	3	27	Friday	January	0.915606	121.52	19.1233	22.2161	63.4912	1.47682	1.19439	470.07	9.11165	11.9766	5.51588	16.9151	70.3245	31.992	48.6494
6MULG_S_1	Male	Ulaanbaatar	Urban	Summer	1	47	Monday	July	0.997193	99.0555	21.5651	26.8631	15.2728	1.55792	0.67409	99.8102	8.76465	10.2389	9.42344	28.6428	542.142	67.302	36.1029
6MULG_S_2	Male	Ulaanbaatar	Urban	Summer	2	47	Tuesday	July	1.24649	119.339	20.0123	35.8386	181.576	2.34802	0.836928	184.097	12.7532	77.2461	7.67639	37.8736	253.663	11.976	77.3269
6MULG_S_3	Male	Ulaanbaatar	Urban	Summer	3	47	Wedesday	July	1.24649	66.0742	10.9595	17.0817	9.74858	0.839846	0.428808	149.916	5.67198	8.31436	7.14136	16.8145	240.7	26.1	23.0444
7MULC_S_1	Male	Ulaanbaatar	Urban	Summer	1	27	Friday	July	0.90492	293.523	18.3068	34.1032	1080.12	3.15244	0.885737	1160.2	14.5683	242.828	17.0322	33.9152	137.918	27.112	303.661
7MULC_S_2	Male	Ulaanbaatar	Urban	Summer	2	27	Saturday	July	0.90492	338.39	29.5348	41.9825	824.799	3.87643	2.66443	872.487	15.905	259.01	11.5276	24.2607	296.576	29.125	28.1654
7MULC_S_3	Male	Ulaanbaatar	Urban	Summer	3	27	Sunday	July	0.723936	206.814	24.8561	30.0021	285.841	2.26038	1.49048	425.742	10.8141	34.5097	6.20873	27.0253	241.892	9.624	50.2453
7MULG_S_1	Male	Ulaanbaatar	Urban	Summer	1	27	Monday	July	0.723936	206.956	14.9893	19.4461	149.992	1.18304	1.04323	221.706	4.19194	15.9033	4.96997	12.4442	281.421	9.856	0
7MULG_S_2	Male	Ulaanbaatar	Urban	Summer	2	27	Tuesday	July	0.90492	67.3169	10.5208	9.30827	1338.49	1.34269	0.714981	1449.52	8.00018	79.4354	7.66569	14.6281	131.53	0	152.093
7MULG_S_3	Male	Ulaanbaatar	Urban	Summer	3	27	Wedesday	July	0.90492	274.156	38.9287	45.3905	21.2844	3.08604	2.90691	157.601	10.5103	11.052	14.8573	31.0749	837.28	27.216	50.3137
7MULG_W_1	Male	Ulaanbaatar	Urban	Winter	1	27	Wedesday	January	0.915606	204.947	37.198	46.5578	158.471	3.95855	3.79138	286.848	6.70619	19.5459	10.4555	21.3129	245.627	22.688	65.4206
7MULG_W_2	Male	Ulaanbaatar	Urban	Winter	2	27	Thursday	January	0.915606	93.0945	30.1004	25.6709	8.17797	1.28776	0.822276	264.362	14.2539	2.6852	13.1206	16.5148	426.669	47.456	19.3317
7MULG_W_3	Male	Ulaanbaatar	Urban	Winter	3	27	Friday	January	0.915606	65.595	9.36005	12.4738	138.078	0.816684	0.702343	243.194	4.59463	13.3045	2.12452	12.528	104.411	13.536	14.5948
8MULC_S_1	Male	Ulaanbaatar	Urban	Summer	1	27	Friday	July	0.90492	139.055	10.3469	27.0381	125.945	1.57195	2.10909	228.502	7.35683	31.1857	6.2865	17.5264	34.5423	0	0
8MULC_S_2	Male	Ulaanbaatar	Urban	Summer	2	27	Saturday	July	0.90492	337.408	25.975	46.6881	394.082	3.06437	2.64633	831.808	14.4951	172.682	15.9029	31.0823	187.703	37.312	0
8MULC_S_3	Male	Ulaanbaatar	Urban	Summer	3	27	Sunday	July	0.723936	122.42	19.5965	28.6648	141.13	2.27586	1.72781	175.072	9.85169	38.4688	3.12218	20.7697	467.04	40.5	161.622
8MULG_S_1	Male	Ulaanbaatar	Urban	Summer	1	39	Monday	July	2.15825	66.3107	16.7711	16.6864	42.1189	1.24264	0.82117	111.309	6.00864	6.20624	6.88086	11.87	334.608	12.992	101.491
8MULG_S_2	Male	Ulaanbaatar	Urban	Summer	2	39	Tuesday	July	2.69781	223.1	33.0395	56.0946	149.632	2.8814	1.64973	1111.91	23.705	58.224	16.8232	55.3043	62.9923	4.56	124.952
8MULG_S_3	Male	Ulaanbaatar	Urban	Summer	3	39	Wedesday	July	2.69781	91.6669	11.8436	21.0882	8.52894	1.03569	0.986281	55.2294	8.07132	23.4477	1.22213	16.6781	177.518	0	22.227
9MULC_S_1	Male	Ulaanbaatar	Urban	Summer	1	23	Friday	July	0.90492	145.647	23.6166	24.6152	9.18123	1.40722	0.879156	459.288	10.8622	7.05772	16.1759	30.0856	434.19	35.993	0
9MULC_S_2	Male	Ulaanbaatar	Urban	Summer	2	23	Saturday	July	0.90492	44.9727	7.71852	9.91158	10.081	1.38291	0.914759	242.76	4.64893	4.97333	2.03343	12.6336	57.6136	10.625	0
9MULC_S_3	Male	Ulaanbaatar	Urban	Summer	3	23	Sunday	July	0.723936	45.6154	6.40635	8.91092	78.0361	0.562412	0.578546	161.635	2.5732	7.32371	1.1838	7.50224	62.7079	12.6	0
9MULC_W_1	Male	Ulaanbaatar	Urban	Winter	1	23	Friday	January	0.915606	137.908	22.3116	32.9792	121.211	1.65435	0.567122	201.609	13.5322	33.8583	8.08364	33.9513	535.901	11.508	115.948
9MULC_W_2	Male	Ulaanbaatar	Urban	Winter	2	23	Saturday	January	0.915606	138.087	21.2986	33.3948	261.529	1.75168	0.634233	392.892	13.7955	41.5485	13.7885	34.2023	441.42	26.6	136.346
9MULC_W_3	Male	Ulaanbaatar	Urban	Winter	3	23	Sunday	January	0.732485	104.834	7.22111	17.2295	163.311	0.844968	0.468995	526.206	7.04668	22.8055	1.55217	16.3277	0.00627995	18.925	27.0132
9MULG_S_1	Male	Ulaanbaatar	Urban	Summer	1	32	Monday	July	0.723936	85.2097	18.3948	19.7217	225.348	1.24652	0.489365	312.521	9.16844	25.5783	10.255	24.1475	450.91	53.61	79.3753
9MULG_S_2	Male	Ulaanbaatar	Urban	Summer	2	32	Tuesday	July	0.90492	91.1003	10.3931	13.0593	70.2807	0.895482	0.268963	145.446	5.27593	15.0136	7.75656	13.6853	271.443	16.38	96.5306
9MULG_S_3	Male	Ulaanbaatar	Urban	Summer	3	32	Wedesday	July	0.90492	103.642	16.0335	25.4054	112.893	1.4667	0.656988	303.347	11.1475	22.1703	3.63996	29.3248	163.964	18.456	131.225
9MULG_W_1	Male	Ulaanbaatar	Urban	Winter	1	32	Saturday	January	0.915606	57.4819	12.2196	13.9849	25.405	0.823022	0.598007	67.1005	5.13319	6.94735	1.75636	10.0032	209.572	0	0
9MULG_W_2	Male	Ulaanbaatar	Urban	Winter	2	32	Sunday	January	0.732485	36.0023	6.31953	8.98417	395.75	0.609682	0.3676	456.696	4.15966	19.5989	2.75712	9.58358	110.841	0	0
9MULG_W_3	Male	Ulaanbaatar	Urban	Winter	3	32	Monday	January	0.732485	98.7541	15.0743	18.0204	356.402	1.60068	1.25105	418.127	4.50874	32.5886	3.40523	11.5578	266.956	11.4	64.0123
